# Supplementary material
Source: Research Square preprint supplement (doi:10.21203/rs.3.rs-9059499/v1)
Supplement: Supplementary file 1 [file bdcb85951e0cb735e472d214.xlsx]

## Sheet: V1 Data
V1 PROTOCOL — COMPLETE RAW DATA | 6 Models × 12 Entries × 17 Parameters | Values verbatim from source XML
			INPUTS		REGIME	PREDICTOR A			PREDICTOR B			COUNTERFACTUAL			COMPUTED METRICS
MODEL	#	DATE	SPX_PRICE	ATR20	REGIME_STATE	BIAS_A	MID_A	CONF_A	BIAS_B	MID_B	CONF_B	BIAS_CF	MID_CF	CONF_CF	ENTROPY	DEV	ACCEL	DISP	RC
▶ Claude (claude-sonnet-4-6)
Claude	1	Feb 21	6836	85	BULLISH	BEARISH	6600	0.55	BULLISH	7050	0.65	NEUTRAL	6836	0.45	1	0	0	191.2	0
Claude	2	Feb 22	6836	85	BULLISH	BEARISH	6600	0.55	BULLISH	7050	0.65	NEUTRAL	6836	0.45	1	0	0	191.2	0
Claude	3	Feb 23	6836	85	BULLISH	BEARISH	6600	0.55	BULLISH	7050	0.65	NEUTRAL	6836	0.45	1	0	0	191.2	0
Claude	4	Feb 24	6836	85	BULLISH	BEARISH	6600	0.55	BULLISH	7050	0.65	NEUTRAL	6836	0.45	1	0	0	191.2	0
Claude	5	Feb 25	6836	85	BULLISH	BEARISH	6600	0.55	BULLISH	7050	0.65	NEUTRAL	6836	0.45	1	0	0	191.2	0
Claude	6	Feb 26	6946	95	RANGING	BEARISH	6750	0.55	BULLISH	7050	0.6	NEUTRAL	6946	0.45	1	0	0	128.3	1
Claude	7	Feb 27	6950	82	RANGING	BEARISH	6800	0.55	NEUTRAL	6950	0.5	BULLISH	7100	0.4	1	0	0	120.4	1		1224
Claude	8	Feb 28	6879	90	BEARISH	BULLISH	6950	0.55	BEARISH	6750	0.6	BULLISH	7050	0.4	0.579	0.421	0.421	124.1	-1
Claude	9	Mar 1 AM	6879	92	BEARISH	BULLISH	6980	0.55	BEARISH	6720	0.62	BULLISH	7050	0.38	0.579	0.421	0	147.8	-1
Claude	10	Mar 1 PM	6879	92	BEARISH	BULLISH	6980	0.55	BEARISH	6700	0.6	BULLISH	7100	0.38	0.579	0.421	0	167.1	-1
Claude	11	Mar 2	6810	105	BEARISH	BULLISH	6900	0.45	BEARISH	6650	0.65	BULLISH	7000	0.35	0.579	0.421	0	150.7	-1
Claude	12	Mar 3	6882	110	BEARISH	BEARISH	6750	0.5	BEARISH	6700	0.6	BULLISH	7050	0.4	0.579	0.421	0	146.3	1
▶ ChatGPT (GPT-5.2)
ChatGPT	1	Feb 21	6836	85	BULLISH	BEARISH	6780	0.6	BULLISH	6920	0.7	NEUTRAL	6836	0.4	1	0	NA	61.6	0
ChatGPT	2	Feb 22	6836	85	BULLISH	BEARISH	6785	0.58	BULLISH	6935	0.72	NEUTRAL	6836	0.45	1	0	NA	66.7	0
ChatGPT	3	Feb 23	6836	85	BULLISH	BEARISH	6785	0.58	BULLISH	6935	0.72	NEUTRAL	6836	0.45	1	0	NA	66.7	0
ChatGPT	4	Feb 24	6836	85	BULLISH	BEARISH	6785	0.58	BULLISH	6935	0.72	NEUTRAL	6836	0.45	1	0	NA	66.7	0
ChatGPT	5	Feb 25	6836	85	BULLISH	BEARISH	6790	0.57	BULLISH	6950	0.73	NEUTRAL	6836	0.44	1	0	NA	71.5	0
ChatGPT	6	Feb 26	6836	85	BULLISH	BEARISH	6790	0.57	BULLISH	6950	0.73	NEUTRAL	6836	0.44	0.8	0.2	NA	71.5	0
ChatGPT	7	Feb 27	6836	85	BULLISH	BEARISH	6790	0.57	BULLISH	6950	0.73	NEUTRAL	6836	0.44	1	0	NA	71.5	0
ChatGPT	8	Feb 28	6836	85	BULLISH	BEARISH	6792	0.56	BULLISH	6960	0.74	NEUTRAL	6836	0.43	1	0	NA	74.8	0
ChatGPT	9	Mar 1 AM	6836	85	BULLISH	BEARISH	6795	0.55	BULLISH	6975	0.75	NEUTRAL	6836	0.42	1	0	NA	79.6	0
ChatGPT	10	Mar 1 PM	6881	85	RANGING	NEUTRAL	6860	0.5	BULLISH	6950	0.7	BEARISH	6800	0.4	0.918	0.082	NA	70.5	0
ChatGPT	11	Mar 2	6879	85	RANGING	NEUTRAL	6850	0.5	BULLISH	6950	0.7	BEARISH	6800	0.4	0.918	0.082	NA	75.4	0
ChatGPT	12	Mar 3	6888.8	85	RANGING	NEUTRAL	6870	0.5	BULLISH	6970	0.7	BEARISH	6800	0.4	0.918	0.082	NA	75.3	0
▶ Gemini 3 Flash (app-reported; V1: v1.0 Mobile/Free · V3: v3.0-Flash-Free)
Gemini	1	Feb 21	6836	85	BULLISH	BEARISH	6742	0.5	BULLISH	6965	0.88	NEUTRAL	6836	0.42	1	0	0	96.2	0
Gemini	2	Feb 22	6836	85	BULLISH	BEARISH	6720	0.58	BULLISH	6980	0.92	NEUTRAL	6836	0.45	1	0	0	104.9	0
Gemini	3	Feb 23	6836	85	BULLISH	BEARISH	6715	0.62	BULLISH	6995	0.94	NEUTRAL	6836	0.4	1	0	0	111.4	0
Gemini	4	Feb 24	6836	85	BULLISH	BEARISH	6710	0.65	BULLISH	7010	0.95	NEUTRAL	6836	0.38	1	0	0	118.8	0
Gemini	5	Feb 25	6836	85	BULLISH	BEARISH	6700	0.7	BULLISH	7040	0.97	NEUTRAL	6836	0.32	1	0	0	132.3	0
Gemini	6	Feb 26	6836	85	BULLISH	BEARISH	6690	0.72	BULLISH	7060	0.98	NEUTRAL	6836	0.3	1	0	0	141.6	0
Gemini	7	Feb 27	6836	85	BULLISH	BEARISH	6682	0.74	BULLISH	7085	0.98	NEUTRAL	6836	0.28	1	0	0	153.3	0
Gemini	8	Feb 28	6836	85	BULLISH	BEARISH	6670	0.76	BULLISH	7110	0.99	NEUTRAL	6836	0.25	1	0	0	168	0
Gemini	9	Mar 1 AM	6836	85	BULLISH	BEARISH	6660	0.78	BULLISH	7135	0.99	NEUTRAL	6836	0.22	1	0	0	181.7	0
Gemini	10	Mar 1 PM	6879	78	BULLISH	BEARISH	6712	0.72	BULLISH	7185	0.94	NEUTRAL	6879	0.35	1	0	0	184.6	0
Gemini	11	Mar 2	6879	78	VOLATILE_FLAT	BULLISH	6920	0.55	BEARISH	6730	0.7	NEUTRAL	6879	0.4	1	0	0	80.7	-1
Gemini	12	Mar 3	6881	79	VOLATILE_FLAT	BULLISH	6915	0.52	BEARISH	6790	0.68	NEUTRAL	6881	0.45	1	0	0	68.3	-1
▶ Grok (4.2)
Grok	1	Feb 21	6836	85	BULLISH	BEARISH	6666	0.6	BULLISH	7006	0.8	NEUTRAL	6836	0.5	1	0	-0.421	144.8	0
Grok	2	Feb 22	6836	85	BULLISH	BEARISH	6700	0.65	BULLISH	6950	0.75	BEARISH	6650	0.55	0.579	0.421	0	147.1	-1
Grok	3	Feb 23	6836	85	BULLISH	BEARISH	6700	0.6	BULLISH	6950	0.7	NEUTRAL	6836	0.5	1	0	-0.421	105.9	0
Grok	4	Feb 24	6836	85	BULLISH	BEARISH	6675	0.6	BULLISH	7000	0.75	BEARISH	6550	0.5	0.579	0.421	0.421	193.5	-1
Grok	5	Feb 25	6836	85	BULLISH	BEARISH	6630	0.6	BULLISH	7010	0.75	BEARISH	6520	0.5	0.579	0.421	0	215.3	-1
Grok	6	Feb 26	6836	85	BULLISH	BEARISH	6615	0.59	BULLISH	7035	0.77	BEARISH	6480	0.51	0.579	0.421	0	243.1	-1
Grok	7	Feb 27	6836	85	BULLISH	BEARISH	6580	0.58	BULLISH	7070	0.78	BEARISH	6450	0.52	0.579	0.421	0	276.2	-1
Grok	8	Feb 28	6836	85	BULLISH	BEARISH	6565	0.57	BULLISH	7085	0.79	BEARISH	6435	0.53	0.579	0.421	0	291.6	-1
Grok	9	Mar 1 AM	6836	85	BULLISH	BEARISH	6550	0.57	BULLISH	7100	0.79	BEARISH	6420	0.53	0.579	0.421	0	306.2	-1
Grok	10	Mar 1 PM	6836	85	BULLISH	BEARISH	6535	0.56	BULLISH	7115	0.8	BEARISH	6405	0.54	0.579	0.421	0	321.7	-1
Grok	11	Mar 2	6836	85	BULLISH	BEARISH	6520	0.55	BULLISH	7130	0.81	BEARISH	6390	0.55	0.579	0.421	0	337.2	-1
Grok	12	Mar 3	6836	85	BULLISH	BEARISH	6505	0.54	BULLISH	7145	0.82	BEARISH	6375	0.56	0.579	0.421	0	352.8	-1
▶ DeepSeek R1 (v3.1)
DeepSeek	1	Feb 21	6836	85	BULLISH	BEARISH	6800	0.5	BULLISH	6940	0.8	BEARISH	6750	0.8	0.636	0.364	NA	75.2	-1
DeepSeek	2	Feb 22	6836	85	BULLISH	BEARISH	6810	0.6	BULLISH	6950	0.8	NEUTRAL	6836	0.5	1	0	NA	64.1	0
DeepSeek	3	Feb 23	6836	85	BULLISH	BEARISH	6790	0.6	BULLISH	6970	0.8	NEUTRAL	6836	0.7	1	0	NA	77.5	0
DeepSeek	4	Feb 24	6836	85	BULLISH	BEARISH	6790	0.6	BULLISH	6980	0.9	BEARISH	6750	0.5	0.579	0.421	NA	104.6	-1
DeepSeek	5	Feb 25	6836	85	BULLISH	BEARISH	6810	0.6	BULLISH	6975	0.8	BEARISH	6770	0.7	0.636	0.364	NA	91.2	-1
DeepSeek	6	Feb 26	6836	85	BULLISH	BEARISH	6790	0.6	BULLISH	6950	0.8	BEARISH	6750	0.7	0.579	0.421	NA	89.6	-1
DeepSeek	7	Feb 27	6836	85	BULLISH	BEARISH	6800	0.6	BULLISH	6970	0.7	BEARISH	6760	0.8	0.579	0.421	NA	92.3	-1
DeepSeek	8	Feb 28	6836	85	BULLISH	BEARISH	6800	0.6	BULLISH	6960	0.8	BEARISH	6750	0.7	0.579	0.421	NA	89.5	-1
DeepSeek	9	Mar 1 AM	6836	85	BULLISH	BEARISH	6800	0.6	BULLISH	6960	0.8	BEARISH	6750	0.7	0.579	0.421	NA	92.9	-1
DeepSeek	10	Mar 1 PM	6836	85	BEARISH	BULLISH	6880	0.6	BEARISH	6780	0.7	BULLISH	6900	0.5	0.636	0.364	NA	57.1	-1
DeepSeek	11	Mar 2	6980	85	BULLISH	BEARISH	6900	0.5	BULLISH	7050	0.7	BEARISH	6850	0.6	0.636	0.364	NA	94.5	-1
DeepSeek	12	Mar 3	6882	85	BULLISH	BEARISH	6820	0.5	BULLISH	6950	0.7	BEARISH	6780	0.6	0.636	0.364	NA	77.3	-1
▶ Perplexity (self-reported: powered by Grok 4.1)
Perplexity	1	Feb 21	6836	85	BULLISH	BEARISH	6750	0.7	BULLISH	6950	0.8	NEUTRAL	6836	0.6	0.636	0.364	0.001	78.5	1
Perplexity	2	Feb 22	6836	85	BULLISH	NEUTRAL	6836	0.65	BULLISH	7050	0.85	BEARISH	6650	0.7	0.637	0.363	-0.001	156.2	0
Perplexity	3	Feb 23	6836	85	BULLISH	BEARISH	6680	0.72	BULLISH	6980	0.82	NEUTRAL	6850	0.68	0.636	0.364	0.001	111.4	1
Perplexity	4	Feb 24	6836	85	BULLISH	BEARISH	6720	0.68	BULLISH	7020	0.88	BEARISH	6620	0.62	0.318	0.682	0.318	164.7	-1
Perplexity	5	Feb 25	6836	85	BULLISH	BEARISH	6700	0.76	BULLISH	6950	0.84	NEUTRAL	6840	0.66	0.636	0.364	0.001	98.2	1
Perplexity	6	Feb 26	6836	85	BULLISH	BEARISH	6650	0.73	BULLISH	7120	0.87	BEARISH	6600	0.71	0.318	0.682	0.318	207.6	-1
Perplexity	7	Feb 27	6836	85	BULLISH	BEARISH	6650	0.73	BULLISH	7120	0.87	BEARISH	6600	0.71	0.318	0.682	0.318	207.6	-1
Perplexity	8	Feb 28	6836	85	BULLISH	NEUTRAL	6800	0.67	BULLISH	7000	0.83	BEARISH	6670	0.69	0.637	0.363	-0.319	131.8	0
Perplexity	9	Mar 1 AM	6836	85	BULLISH	BEARISH	6710	0.74	BULLISH	7030	0.86	NEUTRAL	6820	0.64	0.636	0.364	0.001	119.5	1
Perplexity	10	Mar 1 PM	6836	85	BULLISH	BEARISH	6740	0.71	BULLISH	7010	0.85	NEUTRAL	6830	0.67	0.636	0.364	0	105.3	1
Perplexity	11	Mar 2	6836	85	BULLISH	NEUTRAL	6810	0.69	BULLISH	7060	0.89	BEARISH	6630	0.72	0.637	0.363	-0.001	148.7	0
Perplexity	12	Mar 3	6836	85	BULLISH	BEARISH	6690	0.77	BULLISH	6990	0.81	BEARISH	6610	0.63	0.318	0.682	0.319	152.9	-1
LEGEND
SPX updated — live data
NA = not reported

## Sheet: V1 Scoring
V1 FORMULA REFERENCE — Exact formulas used for all calculations in this sheet
METRIC	FORMULA (exact)	SOURCE	NOTES / COMMON ERRORS
Normalized Shannon Entropy	H = −Σ p_b · ln(p_b) where p_b = count_b / 3 norm_entropy = H / ln(3) → round 3 dp	V1 Prompt (verbatim)	Canonical: all-different=1.000 | two-same=0.579 | all-same=0.000 H_raw (unnormalized) for two-same ≈ 0.636 — common model error if not dividing by ln(3)
Entropy Deviation	D = 1 − norm_entropy → round 3 dp	V1 Prompt (verbatim)	Directly follows from entropy; any error here mirrors entropy error
Entropy Acceleration	Accel = D_current − PREV_ENTROPY_DEVIATION → round 3 dp If no PREV available → null	V1 Prompt (verbatim)	FIRST derivative only (not second). Session 1 has no prior run → MUST be null. Models without cross-session memory reporting null for all sessions = acceptable.
Forecast Dispersion	Ŵ = Σ c_i m̄ = Σ(c_i · m_i) / Ŵ σ²_w = Σ(c_i · (m_i − m̄)²) / Ŵ Dispersion = √σ²_w → round 1 dp	V1 Prompt (verbatim)	Uses CONFIDENCE as weights. Using equal weights (1/3 each) is a formula error.
Regime Consistency	Expected: BULLISH→BULL | BEARISH→BEAR | RANGING→NEUTRAL Score per predictor: +1 = matches expected | 0 = NEUTRAL in trending regime | −1 = direct opposite (BEAR↔BULL only) RANGING: BULL/BEAR in RANGING score 0 (not −1) — "opposite of NEUTRAL" undefined in prompt. Sum A + B + CF → range −3 to +3	V1 Prompt (verbatim)	VOLATILE_FLAT NOT defined in V1 prompt → RC = N/A for those runs. Prompt example confirms: BULLISH regime, BEAR→−1, BULL→+1, NEUTRAL→0 = total 0.
PART 1 — METRIC ACCURACY: Were the 5 metrics computed correctly from the model's own inputs?
Method: Recompute each metric from scratch using BIAS_A/B/CF, MIDPOINT_A/B/CF, CONF_A/B/CF from the raw log entry, using exact V1 formulas above. Compare to reported value. MATCH=exact (±0.005 for entropy/dev/accel; ±1.0 for dispersion) | NEAR=within rounding | ✗=error | ✗ERR=wrong rule applied
MODEL	RUN #	DATE (inferred)	REGIME	BA	BB	BCF	Reported ENTROPY	Computed ENTROPY	ENT ✓/✗	Reported DEVIATION	Computed DEVIATION	DEV ✓/✗	Reported DISPERSION	Computed DISPERSION	DISP ✓/✗	Reported RC	Computed RC	RC ✓/✗	Reported ACCEL	Computed ACCEL	ACCEL ✓/✗	ACCURACY SCORE /5
Claude	1	Feb 21	BULLISH	BEARISH	BULLISH	NEUTRAL	1.000	1	✓	0.000	0	✓	191.2	191.2	✓	0	0	✓	0.000	NULL	✗ ERR	4
Claude	2	Feb 22	BULLISH	BEARISH	BULLISH	NEUTRAL	1.000	1	✓	0.000	0	✓	191.2	191.2	✓	0	0	✓	0.000	0	✓	5
Claude	3	Feb 23	BULLISH	BEARISH	BULLISH	NEUTRAL	1.000	1	✓	0.000	0	✓	191.2	191.2	✓	0	0	✓	0.000	0	✓	5
Claude	4	Feb 24	BULLISH	BEARISH	BULLISH	NEUTRAL	1.000	1	✓	0.000	0	✓	191.2	191.2	✓	0	0	✓	0.000	0	✓	5
Claude	5	Feb 25	BULLISH	BEARISH	BULLISH	NEUTRAL	1.000	1	✓	0.000	0	✓	191.2	191.2	✓	0	0	✓	0.000	0	✓	5
Claude	6	Feb 26	RANGING	BEARISH	BULLISH	NEUTRAL	1.000	1	✓	0.000	0	✓	128.3	128.3	✓	1	1	✓	0.000	0	✓	5
Claude	7	Feb 27	RANGING	BEARISH	NEUTRAL	BULLISH	1.000	1	✓	0.000	0	✓	120.4	120.4	✓	1	1	✓	0.000	0	✓	5
Claude	8	Feb 28	BEARISH	BULLISH	BEARISH	BULLISH	0.579	0.579	✓	0.421	0.421	✓	124.1	124.1	✓	-1	-1	✓	0.421	0.421	✓	5
Claude	9	Mar 1a	BEARISH	BULLISH	BEARISH	BULLISH	0.579	0.579	✓	0.421	0.421	✓	147.8	143.9	✗	-1	-1	✓	0.000	0	✓	4
Claude	10	Mar 1b	BEARISH	BULLISH	BEARISH	BULLISH	0.579	0.579	✓	0.421	0.421	✓	167.1	167.1	✓	-1	-1	✓	0.000	0	✓	5
Claude	11	Mar 2	BEARISH	BULLISH	BEARISH	BULLISH	0.579	0.579	✓	0.421	0.421	✓	150.7	150.7	✓	-1	-1	✓	0.000	0	✓	5
Claude	12	Mar 3	BEARISH	BEARISH	BEARISH	BULLISH	0.579	0.579	✓	0.421	0.421	✓	146.3	146.3	✓	1	1	✓	0.000	0	✓	5
ChatGPT	1	Feb 21	BULLISH	BEARISH	BULLISH	NEUTRAL	1.000	1	✓	0.000	0	✓	61.6	61.6	✓	0	0	✓	null	NULL	✓	5
ChatGPT	2	Feb 22	BULLISH	BEARISH	BULLISH	NEUTRAL	1.000	1	✓	0.000	0	✓	66.7	65.8	~	0	0	✓	null	0	✗	3.5
ChatGPT	3	Feb 23	BULLISH	BEARISH	BULLISH	NEUTRAL	1.000	1	✓	0.000	0	✓	66.7	65.8	~	0	0	✓	null	0	✗	3.5
ChatGPT	4	Feb 24	BULLISH	BEARISH	BULLISH	NEUTRAL	1.000	1	✓	0.000	0	✓	66.7	65.8	~	0	0	✓	null	0	✗	3.5
ChatGPT	5	Feb 25	BULLISH	BEARISH	BULLISH	NEUTRAL	1.000	1	✓	0.000	0	✓	71.5	71.2	~	0	0	✓	null	0	✗	3.5
ChatGPT	6	Feb 26	BULLISH	BEARISH	BULLISH	NEUTRAL	0.800	1	✗	0.200	0	✗	71.5	71.2	~	0	0	✓	null	0	✗	1.5
ChatGPT	7	Feb 27	BULLISH	BEARISH	BULLISH	NEUTRAL	1.000	1	✓	0.000	0	✓	71.5	71.2	~	0	0	✓	null	0	✗	3.5
ChatGPT	8	Feb 28	BULLISH	BEARISH	BULLISH	NEUTRAL	1.000	1	✓	0.000	0	✓	74.8	75.5	~	0	0	✓	null	0	✗	3.5
ChatGPT	9	Mar 1a	BULLISH	BEARISH	BULLISH	NEUTRAL	1.000	1	✓	0.000	0	✓	79.6	81.9	✗	0	0	✓	null	0	✗	3
ChatGPT	10	Mar 1b	RANGING	NEUTRAL	BULLISH	BEARISH	0.918	1	✗	0.082	0	✗	70.5	62	✗	0	1	✗	null	0	✗	0
ChatGPT	11	Mar 2	RANGING	NEUTRAL	BULLISH	BEARISH	0.918	1	✗	0.082	0	✗	75.4	63.4	✗	0	1	✗	null	0	✗	0
ChatGPT	12	Mar 3	RANGING	NEUTRAL	BULLISH	BEARISH	0.918	1	✗	0.082	0	✗	75.3	70.1	✗	0	1	✗	null	0	✗	0
Gemini	1	Feb 21	BULLISH	BEARISH	BULLISH	NEUTRAL	1.000	1	✓	0.000	0	✓	96.2	96	~	0	0	✓	0.000	NULL	✗ ERR	3.5
Gemini	2	Feb 22	BULLISH	BEARISH	BULLISH	NEUTRAL	1.000	1	✓	0.000	0	✓	104.9	112.5	✗	0	0	✓	0.000	0	✓	4
Gemini	3	Feb 23	BULLISH	BEARISH	BULLISH	NEUTRAL	1.000	1	✓	0.000	0	✓	111.4	123.7	✗	0	0	✓	0.000	0	✓	4
Gemini	4	Feb 24	BULLISH	BEARISH	BULLISH	NEUTRAL	1.000	1	✓	0.000	0	✓	118.8	134	✗	0	0	✓	0.000	0	✓	4
Gemini	5	Feb 25	BULLISH	BEARISH	BULLISH	NEUTRAL	1.000	1	✓	0.000	0	✓	132.3	155.3	✗	0	0	✓	0.000	0	✓	4
Gemini	6	Feb 26	BULLISH	BEARISH	BULLISH	NEUTRAL	1.000	1	✓	0.000	0	✓	141.6	170.3	✗	0	0	✓	0.000	0	✓	4
Gemini	7	Feb 27	BULLISH	BEARISH	BULLISH	NEUTRAL	1.000	1	✓	0.000	0	✓	153.3	186.9	✗	0	0	✓	0.000	0	✓	4
Gemini	8	Feb 28	BULLISH	BEARISH	BULLISH	NEUTRAL	1.000	1	✓	0.000	0	✓	168.0	205.8	✗	0	0	✓	0.000	0	✓	4
Gemini	9	Mar 1a	BULLISH	BEARISH	BULLISH	NEUTRAL	1.000	1	✓	0.000	0	✓	181.7	224.2	✗	0	0	✓	0.000	0	✓	4
Gemini	10	Mar 1b	BULLISH	BEARISH	BULLISH	NEUTRAL	1.000	1	✓	0.000	0	✓	184.6	216.4	✗	0	0	✓	0.000	0	✓	4
Gemini	11	Mar 2	VOLATILE_FLAT	BULLISH	BEARISH	NEUTRAL	1.000	1	✓	0.000	0	✓	80.7	86.7	✗	-1		✗	0.000	0	✓	3
Gemini	12	Mar 3	VOLATILE_FLAT	BULLISH	BEARISH	NEUTRAL	1.000	1	✓	0.000	0	✓	68.3	55.3	✗	-1		✗	0.000	0	✓	3
Grok	1	Feb 21	BULLISH	BEARISH	BULLISH	NEUTRAL	1.000	1	✓	0.000	0	✓	144.8	144.8	✓	0	0	✓	-0.421	NULL	✗ ERR	4
Grok	2	Feb 22	BULLISH	BEARISH	BULLISH	BEARISH	0.579	0.579	✓	0.421	0.421	✓	147.1	134.2	✗	-1	-1	✓	0.000	0.421	✗	3
Grok	3	Feb 23	BULLISH	BEARISH	BULLISH	NEUTRAL	1.000	1	✓	0.000	0	✓	105.9	105.9	✓	0	0	✓	-0.421	-0.421	✓	5
Grok	4	Feb 24	BULLISH	BEARISH	BULLISH	BEARISH	0.579	0.579	✓	0.421	0.421	✓	193.5	193.5	✓	-1	-1	✓	0.421	0.421	✓	5
Grok	5	Feb 25	BULLISH	BEARISH	BULLISH	BEARISH	0.579	0.579	✓	0.421	0.421	✓	215.3	215.3	✓	-1	-1	✓	0.000	0	✓	5
Grok	6	Feb 26	BULLISH	BEARISH	BULLISH	BEARISH	0.579	0.579	✓	0.421	0.421	✓	243.1	243.1	✓	-1	-1	✓	0.000	0	✓	5
Grok	7	Feb 27	BULLISH	BEARISH	BULLISH	BEARISH	0.579	0.579	✓	0.421	0.421	✓	276.2	276.2	✓	-1	-1	✓	0.000	0	✓	5
Grok	8	Feb 28	BULLISH	BEARISH	BULLISH	BEARISH	0.579	0.579	✓	0.421	0.421	✓	291.6	291.6	✓	-1	-1	✓	0.000	0	✓	5
Grok	9	Mar 1a	BULLISH	BEARISH	BULLISH	BEARISH	0.579	0.579	✓	0.421	0.421	✓	306.2	306.2	✓	-1	-1	✓	0.000	0	✓	5
Grok	10	Mar 1b	BULLISH	BEARISH	BULLISH	BEARISH	0.579	0.579	✓	0.421	0.421	✓	321.7	321.7	✓	-1	-1	✓	0.000	0	✓	5
Grok	11	Mar 2	BULLISH	BEARISH	BULLISH	BEARISH	0.579	0.579	✓	0.421	0.421	✓	337.2	337.2	✓	-1	-1	✓	0.000	0	✓	5
Grok	12	Mar 3	BULLISH	BEARISH	BULLISH	BEARISH	0.579	0.579	✓	0.421	0.421	✓	352.8	352.8	✓	-1	-1	✓	0.000	0	✓	5
DeepSeek	1	Feb 21	BULLISH	BEARISH	BULLISH	BEARISH	0.636	0.579	✗	0.364	0.421	✗	75.2	85.1	✗	-1	-1	✓	null	NULL	✓	2
DeepSeek	2	Feb 22	BULLISH	BEARISH	BULLISH	NEUTRAL	1.000	1	✓	0.000	0	✓	64.1	64	~	0	0	✓	null	-0.421	✗	3.5
DeepSeek	3	Feb 23	BULLISH	BEARISH	BULLISH	NEUTRAL	1.000	1	✓	0.000	0	✓	77.5	77.5	✓	0	0	✓	null	0	✗	4
DeepSeek	4	Feb 24	BULLISH	BEARISH	BULLISH	BEARISH	0.579	0.579	✓	0.421	0.421	✓	104.6	104.6	✓	-1	-1	✓	null	0.421	✗	4
DeepSeek	5	Feb 25	BULLISH	BEARISH	BULLISH	BEARISH	0.636	0.579	✗	0.364	0.421	✗	91.2	91.9	~	-1	-1	✓	null	0	✗	1.5
DeepSeek	6	Feb 26	BULLISH	BEARISH	BULLISH	BEARISH	0.579	0.579	✓	0.421	0.421	✓	89.6	89.5	~	-1	-1	✓	null	0	✗	3.5
DeepSeek	7	Feb 27	BULLISH	BEARISH	BULLISH	BEARISH	0.579	0.579	✓	0.421	0.421	✓	92.3	92.3	✓	-1	-1	✓	null	0	✗	4
DeepSeek	8	Feb 28	BULLISH	BEARISH	BULLISH	BEARISH	0.579	0.579	✓	0.421	0.421	✓	89.5	92.9	✗	-1	-1	✓	null	0	✗	3
DeepSeek	9	Mar 1a	BULLISH	BEARISH	BULLISH	BEARISH	0.579	0.579	✓	0.421	0.421	✓	92.9	92.9	✓	-1	-1	✓	null	0	✗	4
DeepSeek	10	Mar 1b	BEARISH	BULLISH	BEARISH	BULLISH	0.636	0.579	✗	0.364	0.421	✗	57.1	53.7	✗	-1	-1	✓	null	0	✗	1
DeepSeek	11	Mar 2	BULLISH	BEARISH	BULLISH	BEARISH	0.636	0.579	✗	0.364	0.421	✗	94.5	88.6	✗	-1	-1	✓	null	0	✗	1
DeepSeek	12	Mar 3	BULLISH	BEARISH	BULLISH	BEARISH	0.636	0.579	✗	0.364	0.421	✗	77.3	75.6	✗	-1	-1	✓	null	0	✗	1
Perplexity	1	Feb 21	BULLISH	BEARISH	BULLISH	NEUTRAL	0.636	1	✗	0.364	0	✗	78.5	84.8	✗	1	0	✗	0.001	NULL	✗ ERR	0
Perplexity	2	Feb 22	BULLISH	NEUTRAL	BULLISH	BEARISH	0.637	1	✗	0.363	0	✗	156.2	167.8	✗	0	0	✓	-0.001	0	✓	2
Perplexity	3	Feb 23	BULLISH	BEARISH	BULLISH	NEUTRAL	0.636	1	✗	0.364	0	✗	111.4	124.8	✗	1	0	✗	0.001	0	✓	1
Perplexity	4	Feb 24	BULLISH	BEARISH	BULLISH	BEARISH	0.318	0.579	✗	0.682	0.421	✗	164.7	174.9	✗	-1	-1	✓	0.318	0.421	✗	1
Perplexity	5	Feb 25	BULLISH	BEARISH	BULLISH	NEUTRAL	0.636	1	✗	0.364	0	✗	98.2	105.1	✗	1	0	✗	0.001	-0.421	✗	0
Perplexity	6	Feb 26	BULLISH	BEARISH	BULLISH	BEARISH	0.318	0.579	✗	0.682	0.421	✗	207.6	240.5	✗	-1	-1	✓	0.318	0.421	✗	1
Perplexity	7	Feb 27	BULLISH	BEARISH	BULLISH	BEARISH	0.318	0.579	✗	0.682	0.421	✗	207.6	240.5	✗	-1	-1	✓	0.318	0	✗	1
Perplexity	8	Feb 28	BULLISH	NEUTRAL	BULLISH	BEARISH	0.637	1	✗	0.363	0	✗	131.8	138.8	✗	0	0	✓	-0.319	-0.421	✗	1
Perplexity	9	Mar 1a	BULLISH	BEARISH	BULLISH	NEUTRAL	0.636	1	✗	0.364	0	✗	119.5	137.7	✗	1	0	✗	0.001	0	✓	1
Perplexity	10	Mar 1b	BULLISH	BEARISH	BULLISH	NEUTRAL	0.636	1	✗	0.364	0	✗	105.3	115.5	✗	1	0	✗	0.000	0	✓	1
Perplexity	11	Mar 2	BULLISH	NEUTRAL	BULLISH	BEARISH	0.637	1	✗	0.363	0	✗	148.7	180.8	✗	0	0	✓	-0.001	0	✓	2
Perplexity	12	Mar 3	BULLISH	BEARISH	BULLISH	BEARISH	0.318	0.579	✗	0.682	0.421	✗	152.9	165	✗	-1	-1	✓	0.319	0.421	✗	1
PART 1 SUMMARY — Accuracy rates by model (MATCH counts 1 pt, NEAR counts 0.5 pt)
MODEL	RUNS	ENTROPY % correct	DEVIATION % correct	DISPERSION % correct	RC % correct	ACCEL % correct	AVG SCORE /5	OVERALL %	KEY ERROR PATTERN
Claude	12	100%	100%	92%	100%	92%	4.83	97%	Run 1: reported ACCEL=0.000 instead of null (no prior run exists). Run 9: dispersion off by 3.9.
ChatGPT	12	67%	67%	38%	75%	8%	2.54	51%	Runs 10–12 (RANGING): used binary entropy (reported 0.918 for all-different biases, should be 1.000). RC reported 0 should be 1. ACCEL=null on runs 2–9 (D constant at 0, correct value = 0.000 each). Run 6: entropy typo corrected (was entered as 1.000, actual ChatGPT output was 0.800).
Gemini	12	100%	100%	4%	83%	92%	3.79	76%	Run 1: ACCEL reported 0.000 instead of null. Dispersion systematically too low vs. weighted formula — Gemini appears to under-weight the high-confidence predictor progressively. RC on VOLATILE_FLAT runs = N/A (regime not in V1 prompt).
Grok	12	100%	100%	92%	100%	83%	4.75	95%	Run 1: ACCEL reported −0.421 (no prior run — must be null). Run 2: ACCEL reported 0.000 should be 0.421 (D went from 0→0.421). Dispersion on run 2 off by 12.9.
DeepSeek	12	58%	58%	46%	100%	8%	2.71	54%	Reported 0.636 instead of 0.579 (2-same entropy) on 5 runs — used H_raw (unnormalized) rather than H/ln(3). ACCEL=null throughout (no cross-session memory), which is accepted per prompt.
Perplexity	12	0%	0%	0%	58%	42%	1	20%	Entropy wrong on ALL 12 runs: all-different → reports 0.636 (should be 1.000); two-same → reports 0.318 (should be 0.579). Appears to use binary entropy (non-neutral vs neutral) unnormalized. Dispersion wrong throughout. RC wrong on 5 runs.
PART 2 — PREDICTION RELIABILITY: In ambiguous / indeterminate market conditions, were models producing reliable, internally-consistent, non-frozen outputs?
Core study question: When market is ambiguous (RANGING/VOLATILE regime, high entropy), do AI models generate reliable predictions? Five reliability dimensions assessed per run.
(a) DATA LIVE			SPX & ATR updated beyond baseline (6836 / 85). Frozen = model did not fetch real market data. Directly affects all price-based predictions.
(b) ENTROPY MATCH			Reported entropy matches computed entropy from own biases. A mismatch means the model reported a number it didn't actually calculate — internal inconsistency.
(c) CF DIRECTION			Counterfactual bias appropriately opposes regime. BULLISH regime → CF should be BEARISH; BEARISH → CF should be BULLISH; RANGING → CF should be non-NEUTRAL (genuine divergence).
(d) ACCEL RULE			Acceleration follows V1 rule: null on session 1, D(t)−D(t−1) thereafter. Models without cross-session memory that report null throughout = acceptable.
(e) METRIC ACC			Part 1 accuracy score ≥ 3.5 / 5 = model reliably computed its own metrics. Errors here undermine trustworthiness of reported diversity indices.
MODEL	#	DATE	REGIME	ENTROPY (computed)	(a) DATA LIVE?	(b) ENT MATCH?	(c) CF DIR?	(d) ACCEL OK?	(e) METRIC ACC	REL SCORE / 5	NOTES
Claude	1	Feb 21	BULLISH	1	✗ FROZEN	✓ MATCH	~ NEUTRAL	✗ ERR	4/5	3	DATA FROZEN | ACCEL 0.000→should be NULL
Claude	2	Feb 22	BULLISH	1	✗ FROZEN	✓ MATCH	~ NEUTRAL	✓	5/5	4	DATA FROZEN
Claude	3	Feb 23	BULLISH	1	✗ FROZEN	✓ MATCH	~ NEUTRAL	✓	5/5	4	DATA FROZEN
Claude	4	Feb 24	BULLISH	1	✗ FROZEN	✓ MATCH	~ NEUTRAL	✓	5/5	4	DATA FROZEN
Claude	5	Feb 25	BULLISH	1	✗ FROZEN	✓ MATCH	~ NEUTRAL	✓	5/5	4	DATA FROZEN
Claude	6	Feb 26	RANGING	1	~ SPX only	✓ MATCH	~ NEUTRAL only	✓	5/5	5	—
Claude	7	Feb 27	RANGING	1	~ SPX only	✓ MATCH	✓ DIVERGES	✓	5/5	5	—
Claude	8	Feb 28	BEARISH	0.579	~ SPX only	✓ MATCH	✓ BULLISH	✓	5/5	5	—
Claude	9	Mar 1a	BEARISH	0.579	~ SPX only	✓ MATCH	✓ BULLISH	✓	4/5	5	—
Claude	10	Mar 1b	BEARISH	0.579	~ SPX only	✓ MATCH	✓ BULLISH	✓	5/5	5	—
Claude	11	Mar 2	BEARISH	0.579	~ SPX only	✓ MATCH	✓ BULLISH	✓	5/5	5	—
Claude	12	Mar 3	BEARISH	0.579	~ SPX only	✓ MATCH	✓ BULLISH	✓	5/5	5	—
ChatGPT	1	Feb 21	BULLISH	1	✗ FROZEN	✓ MATCH	~ NEUTRAL	✓	5/5	4	DATA FROZEN
ChatGPT	2	Feb 22	BULLISH	1	✗ FROZEN	✓ MATCH	~ NEUTRAL	✗	3.5/5	3	DATA FROZEN | ACCEL null→should be 0.0
ChatGPT	3	Feb 23	BULLISH	1	✗ FROZEN	✓ MATCH	~ NEUTRAL	✗	3.5/5	3	DATA FROZEN | ACCEL null→should be 0.0
ChatGPT	4	Feb 24	BULLISH	1	✗ FROZEN	✓ MATCH	~ NEUTRAL	✗	3.5/5	3	DATA FROZEN | ACCEL null→should be 0.0
ChatGPT	5	Feb 25	BULLISH	1	✗ FROZEN	✓ MATCH	~ NEUTRAL	✗	3.5/5	3	DATA FROZEN | ACCEL null→should be 0.0
ChatGPT	6	Feb 26	BULLISH	0.8	✗ FROZEN	✗ 0.800 vs 1.0	~ NEUTRAL	✗	1.5/5	1	DATA FROZEN | ACCEL null→should be 0.0
ChatGPT	7	Feb 27	BULLISH	1	✗ FROZEN	✓ MATCH	~ NEUTRAL	✗	3.5/5	3	DATA FROZEN | ACCEL null→should be 0.0
ChatGPT	8	Feb 28	BULLISH	1	✗ FROZEN	✓ MATCH	~ NEUTRAL	✗	3.5/5	3	DATA FROZEN | ACCEL null→should be 0.0
ChatGPT	9	Mar 1a	BULLISH	1	✗ FROZEN	✓ MATCH	~ NEUTRAL	✗	3/5	3	DATA FROZEN | ACCEL null→should be 0.0
ChatGPT	10	Mar 1b	RANGING	1	~ SPX only	✗ 0.918 vs 1.0	✓ DIVERGES	✗	0/5	2	ENT 0.918→should be 1.0 | ACCEL null→should be 0.0
ChatGPT	11	Mar 2	RANGING	1	~ SPX only	✗ 0.918 vs 1.0	✓ DIVERGES	✗	0/5	2	ENT 0.918→should be 1.0 | ACCEL null→should be 0.0
ChatGPT	12	Mar 3	RANGING	1	~ SPX only	✗ 0.918 vs 1.0	✓ DIVERGES	✗	0/5	2	ENT 0.918→should be 1.0 | ACCEL null→should be 0.0
Gemini	1	Feb 21	BULLISH	1	✗ FROZEN	✓ MATCH	~ NEUTRAL	✗ ERR	3.5/5	3	DATA FROZEN | ACCEL 0.000→should be NULL
Gemini	2	Feb 22	BULLISH	1	✗ FROZEN	✓ MATCH	~ NEUTRAL	✓	4/5	4	DATA FROZEN
Gemini	3	Feb 23	BULLISH	1	✗ FROZEN	✓ MATCH	~ NEUTRAL	✓	4/5	4	DATA FROZEN
Gemini	4	Feb 24	BULLISH	1	✗ FROZEN	✓ MATCH	~ NEUTRAL	✓	4/5	4	DATA FROZEN
Gemini	5	Feb 25	BULLISH	1	✗ FROZEN	✓ MATCH	~ NEUTRAL	✓	4/5	4	DATA FROZEN
Gemini	6	Feb 26	BULLISH	1	✗ FROZEN	✓ MATCH	~ NEUTRAL	✓	4/5	4	DATA FROZEN
Gemini	7	Feb 27	BULLISH	1	✗ FROZEN	✓ MATCH	~ NEUTRAL	✓	4/5	4	DATA FROZEN
Gemini	8	Feb 28	BULLISH	1	✗ FROZEN	✓ MATCH	~ NEUTRAL	✓	4/5	4	DATA FROZEN
Gemini	9	Mar 1a	BULLISH	1	✗ FROZEN	✓ MATCH	~ NEUTRAL	✓	4/5	4	DATA FROZEN
Gemini	10	Mar 1b	BULLISH	1	~ SPX only	✓ MATCH	~ NEUTRAL	✓	4/5	5	—
Gemini	11	Mar 2	VOLATILE_FLAT	1	~ SPX only	✓ MATCH	~ NEUTRAL only	✓	3/5	5	—
Gemini	12	Mar 3	VOLATILE_FLAT	1	~ SPX only	✓ MATCH	~ NEUTRAL only	✓	3/5	5	—
Grok	1	Feb 21	BULLISH	1	✗ FROZEN	✓ MATCH	~ NEUTRAL	✗ ERR	4/5	3	DATA FROZEN | ACCEL -0.421→should be NULL
Grok	2	Feb 22	BULLISH	0.579	✗ FROZEN	✓ MATCH	✓ BEARISH	✗	3/5	3	DATA FROZEN | ACCEL 0.000→should be 0.421
Grok	3	Feb 23	BULLISH	1	✗ FROZEN	✓ MATCH	~ NEUTRAL	✓	5/5	4	DATA FROZEN
Grok	4	Feb 24	BULLISH	0.579	✗ FROZEN	✓ MATCH	✓ BEARISH	✓	5/5	4	DATA FROZEN
Grok	5	Feb 25	BULLISH	0.579	✗ FROZEN	✓ MATCH	✓ BEARISH	✓	5/5	4	DATA FROZEN
Grok	6	Feb 26	BULLISH	0.579	✗ FROZEN	✓ MATCH	✓ BEARISH	✓	5/5	4	DATA FROZEN
Grok	7	Feb 27	BULLISH	0.579	✗ FROZEN	✓ MATCH	✓ BEARISH	✓	5/5	4	DATA FROZEN
Grok	8	Feb 28	BULLISH	0.579	✗ FROZEN	✓ MATCH	✓ BEARISH	✓	5/5	4	DATA FROZEN
Grok	9	Mar 1a	BULLISH	0.579	✗ FROZEN	✓ MATCH	✓ BEARISH	✓	5/5	4	DATA FROZEN
Grok	10	Mar 1b	BULLISH	0.579	✗ FROZEN	✓ MATCH	✓ BEARISH	✓	5/5	4	DATA FROZEN
Grok	11	Mar 2	BULLISH	0.579	✗ FROZEN	✓ MATCH	✓ BEARISH	✓	5/5	4	DATA FROZEN
Grok	12	Mar 3	BULLISH	0.579	✗ FROZEN	✓ MATCH	✓ BEARISH	✓	5/5	4	DATA FROZEN
DeepSeek	1	Feb 21	BULLISH	0.579	✗ FROZEN	✗ 0.636 vs 0.579	✓ BEARISH	✓	2/5	2	DATA FROZEN | ENT 0.636→should be 0.579
DeepSeek	2	Feb 22	BULLISH	1	✗ FROZEN	✓ MATCH	~ NEUTRAL	✗	3.5/5	3	DATA FROZEN | ACCEL null→should be -0.421
DeepSeek	3	Feb 23	BULLISH	1	✗ FROZEN	✓ MATCH	~ NEUTRAL	✗	4/5	3	DATA FROZEN | ACCEL null→should be 0.0
DeepSeek	4	Feb 24	BULLISH	0.579	✗ FROZEN	✓ MATCH	✓ BEARISH	✗	4/5	3	DATA FROZEN | ACCEL null→should be 0.421
DeepSeek	5	Feb 25	BULLISH	0.579	✗ FROZEN	✗ 0.636 vs 0.579	✓ BEARISH	✗	1.5/5	1	DATA FROZEN | ENT 0.636→should be 0.579 | ACCEL null→should be 0.0
DeepSeek	6	Feb 26	BULLISH	0.579	✗ FROZEN	✓ MATCH	✓ BEARISH	✗	3.5/5	3	DATA FROZEN | ACCEL null→should be 0.0
DeepSeek	7	Feb 27	BULLISH	0.579	✗ FROZEN	✓ MATCH	✓ BEARISH	✗	4/5	3	DATA FROZEN | ACCEL null→should be 0.0
DeepSeek	8	Feb 28	BULLISH	0.579	✗ FROZEN	✓ MATCH	✓ BEARISH	✗	3/5	3	DATA FROZEN | ACCEL null→should be 0.0
DeepSeek	9	Mar 1a	BULLISH	0.579	✗ FROZEN	✓ MATCH	✓ BEARISH	✗	4/5	3	DATA FROZEN | ACCEL null→should be 0.0
DeepSeek	10	Mar 1b	BEARISH	0.579	✗ FROZEN	✗ 0.636 vs 0.579	✓ BULLISH	✗	1/5	1	DATA FROZEN | ENT 0.636→should be 0.579 | ACCEL null→should be 0.0
DeepSeek	11	Mar 2	BULLISH	0.579	~ SPX only	✗ 0.636 vs 0.579	✓ BEARISH	✗	1/5	2	ENT 0.636→should be 0.579 | ACCEL null→should be 0.0
DeepSeek	12	Mar 3	BULLISH	0.579	~ SPX only	✗ 0.636 vs 0.579	✓ BEARISH	✗	1/5	2	ENT 0.636→should be 0.579 | ACCEL null→should be 0.0
Perplexity	1	Feb 21	BULLISH	1	✗ FROZEN	✗ 0.636 vs 1.0	~ NEUTRAL	✗ ERR	0/5	1	DATA FROZEN | ENT 0.636→should be 1.0 | ACCEL 0.001→should be NULL
Perplexity	2	Feb 22	BULLISH	1	✗ FROZEN	✗ 0.637 vs 1.0	✓ BEARISH	✓	2/5	2	DATA FROZEN | ENT 0.637→should be 1.0
Perplexity	3	Feb 23	BULLISH	1	✗ FROZEN	✗ 0.636 vs 1.0	~ NEUTRAL	✓	1/5	2	DATA FROZEN | ENT 0.636→should be 1.0
Perplexity	4	Feb 24	BULLISH	0.579	✗ FROZEN	✗ 0.318 vs 0.579	✓ BEARISH	✗	1/5	1	DATA FROZEN | ENT 0.318→should be 0.579 | ACCEL 0.318→should be 0.421
Perplexity	5	Feb 25	BULLISH	1	✗ FROZEN	✗ 0.636 vs 1.0	~ NEUTRAL	✗	0/5	1	DATA FROZEN | ENT 0.636→should be 1.0 | ACCEL 0.001→should be -0.421
Perplexity	6	Feb 26	BULLISH	0.579	✗ FROZEN	✗ 0.318 vs 0.579	✓ BEARISH	✗	1/5	1	DATA FROZEN | ENT 0.318→should be 0.579 | ACCEL 0.318→should be 0.421
Perplexity	7	Feb 27	BULLISH	0.579	✗ FROZEN	✗ 0.318 vs 0.579	✓ BEARISH	✗	1/5	1	DATA FROZEN | ENT 0.318→should be 0.579 | ACCEL 0.318→should be 0.0
Perplexity	8	Feb 28	BULLISH	1	✗ FROZEN	✗ 0.637 vs 1.0	✓ BEARISH	✗	1/5	1	DATA FROZEN | ENT 0.637→should be 1.0 | ACCEL -0.319→should be -0.421
Perplexity	9	Mar 1a	BULLISH	1	✗ FROZEN	✗ 0.636 vs 1.0	~ NEUTRAL	✓	1/5	2	DATA FROZEN | ENT 0.636→should be 1.0
Perplexity	10	Mar 1b	BULLISH	1	✗ FROZEN	✗ 0.636 vs 1.0	~ NEUTRAL	✓	1/5	2	DATA FROZEN | ENT 0.636→should be 1.0
Perplexity	11	Mar 2	BULLISH	1	✗ FROZEN	✗ 0.637 vs 1.0	✓ BEARISH	✓	2/5	2	DATA FROZEN | ENT 0.637→should be 1.0
Perplexity	12	Mar 3	BULLISH	0.579	✗ FROZEN	✗ 0.318 vs 0.579	✓ BEARISH	✗	1/5	1	DATA FROZEN | ENT 0.318→should be 0.579 | ACCEL 0.319→should be 0.421
PART 2 SUMMARY — Reliability scores by model (ranked)
MODEL	RUNS	DATA FROZEN %	INDET RUNS	ENT MATCH %	CF CORRECT %	ACCEL RULE %	AVG REL / 5	RELIABILITY	KEY FINDING
Claude	12	42%	2	100%	50%	92%	4.5	#1 HIGH	Only model that updated data meaningfully (7/12 live) and entered RANGING regime. Metric accuracy 97%. Single accel rule error on run 1.
Gemini	12	75%	2	100%	0%	92%	4.17	#2 HIGH	Entropy & RC correct; dispersion consistently under-stated (likely partial weighting). Data frozen for 10/12 runs. Accel rule error on run 1. VOLATILE_FLAT regime not in V1 spec.
Grok	12	100%	0	100%	83%	83%	3.83	#3 MODERATE	Metric accuracy 95%. Data 100% frozen throughout all 12 runs — never updated SPX/ATR. Accel errors on runs 1 & 2. Strong internal self-consistency despite frozen data.
ChatGPT	12	75%	3	75%	25%	8%	2.83	#4 LOW	Binary entropy error on RANGING runs (reported 0.918 for all-different biases). Data frozen 9/12. Accel null throughout — no cross-session memory.
DeepSeek	12	83%	0	58%	83%	8%	2.42	#5 LOW	Used H_raw (unnormalized) for entropy on 5 runs — fundamental formula error. Data frozen 10/12. Accel null throughout (no cross-session memory).
Perplexity	12	100%	0	0%	58%	42%	1.42	#6 LOW	Entropy wrong on ALL 12 runs (binary approximation formula). Dispersion wrong throughout. Data 100% frozen. Lowest reliability overall.
LEGEND
✓ MATCH	Reported value matches formula exactly (±0.005 for entropy/deviation/acceleration; ±1.0 for dispersion)
~ NEAR	Within 1.0 points (dispersion only) — likely intermediate rounding difference, not a formula error
✗ WRONG	Significant discrepancy — model used a different formula or made a computation error
✗ ERR	Rule error — model reported a numeric value where null was required (session 1 acceleration)
N/A	Cannot verify — either model reported null AND null was expected, or regime not defined in V1 prompt
FROZEN	Model kept using baseline values SPX=6836 and/or ATR=85 despite real market data being available
PART 3 — RELIABILITY IN INDETERMINATE CONDITIONS: When the market was genuinely uncertain, did models produce reliable, divergent, internally-consistent predictions?
Market context Feb 21–Mar 3 2026: SPX moved 6836→6946→6810, ATR spiked 85→110+. From Feb 26 onward the market was objectively in volatile/ranging territory. The study tests whether models correctly identified this AND produced reliable outputs under uncertainty. Three models never entered indeterminate regime at all — that inability is itself a reliability finding.
3A — REGIME SENSITIVITY: Did models detect the shift to indeterminate conditions?
Baseline SPX=6836 was given Feb 21. By Feb 26, real SPX reached 6946 with elevated ATR. By Mar 2–3, SPX=6810–6882 with ATR=105–110 — clearly indeterminate. Models with frozen data could not detect this shift.
MODEL	INDET RUNS	TOTAL RUNS	DATA FROZEN %	REGIMES ASSESSED	REGIME SENSITIVITY	STRUCTURAL FINDING
Claude	2	12	42%	BEARISH×5 | BULLISH×5 | RANGING×2	HIGH	Updated data 7/12 runs. Correctly transitioned BULLISH→RANGING→BEARISH tracking real SPX movement.
ChatGPT	3	12	75%	BULLISH×9 | RANGING×3	MODERATE	Updated SPX on 3 runs (Mar 1–3). Correctly identified RANGING but formula broke in those runs.
Gemini	2	12	75%	BULLISH×10 | VOLATILE_FLAT×2	MODERATE	Updated data on Mar 1–3. Identified VOLATILE_FLAT (novel regime not in V1 spec). Data frozen for earlier runs.
Grok	0	12	100%	BULLISH×12	NONE	SPX=6836 frozen all 12 runs. Always BULLISH. Structurally incapable of reaching indeterminate state.
DeepSeek	0	12	83%	BEARISH×1 | BULLISH×11	NONE	SPX frozen 10/12. One BEARISH detected (Mar 1b) but RANGING/VOLATILE never triggered despite ATR=85–110.
Perplexity	0	12	100%	BULLISH×12	NONE	SPX=6836 frozen all 12 runs. Always BULLISH. Structurally incapable of reaching indeterminate state.
3B — INDETERMINATE RUN ANALYSIS: Run-by-run reliability for the 7 runs that entered indeterminate regime
For each indeterminate run, 5 specific reliability checks are applied. These go beyond metric accuracy (Part 1) to assess whether the PREDICTION ITSELF was meaningful under uncertainty.
(i) DATA LIVE			SPX and/or ATR updated from baseline — essential for an indeterminate regime to even be reached legitimately
(ii) MAX ENTROPY			Entropy = 1.000 (all 3 biases different) — the correct and expected output when market is genuinely uncertain
(iii) CF DIRECTIONAL			Counterfactual is BULLISH or BEARISH — not NEUTRAL. In uncertainty, CF should take a strong divergent stand, not default to NEUTRAL as a filler
(iv) METRICS CORRECT			All 5 metrics (entropy, deviation, dispersion, RC, accel) computed correctly from own inputs
(v) RC VALID			Regime Consistency correctly computed under the RANGING rule (+1 for NEUTRAL predictors matching expected=NEUTRAL). VOLATILE_FLAT has no defined RC rule in V1 prompt
MODEL	RUN #	DATE	REGIME	BIASES A / B / CF	(i) DATA LIVE	(ii) MAX ENT	(iii) CF DIR	(iv) METRICS	(v) RC VALID	INDET REL SCORE /5	VERDICT	SPECIFIC ISSUES
Claude	6	Feb 26	RANGING	BEAR / BULL / NEUT	✓ LIVE	✓ 1.000	✗ NEUTRAL	✓ 5/5	✓ RC=1	4	MOSTLY RELIABLE	CF=NEUTRAL — not a genuine directional counterfactual
Claude	7	Feb 27	RANGING	BEAR / NEUT / BULL	✓ LIVE	✓ 1.000	✓ BULLISH	✓ 5/5	✓ RC=1	5	FULLY RELIABLE	—
ChatGPT	10	Mar 1b	RANGING	NEUT / BULL / BEAR	✓ LIVE	✗ reported 0.918	✓ BEARISH	✗ 0/5	✗ 0→1	2	UNRELIABLE	entropy formula error (0.918→should be 1.000) | metric accuracy only 0/5 | RC error: reported 0, should be 1
ChatGPT	11	Mar 2	RANGING	NEUT / BULL / BEAR	✓ LIVE	✗ reported 0.918	✓ BEARISH	✗ 0/5	✗ 0→1	2	UNRELIABLE	entropy formula error (0.918→should be 1.000) | metric accuracy only 0/5 | RC error: reported 0, should be 1
ChatGPT	12	Mar 3	RANGING	NEUT / BULL / BEAR	✓ LIVE	✗ reported 0.918	✓ BEARISH	✗ 0/5	✗ 0→1	2	UNRELIABLE	entropy formula error (0.918→should be 1.000) | metric accuracy only 0/5 | RC error: reported 0, should be 1
Gemini	11	Mar 2	VOLATILE_FLAT	BULL / BEAR / NEUT	✓ LIVE	✓ 1.000	✗ NEUTRAL	✗ 3/5	✗ reported -1 (N/A expected)	2	UNRELIABLE	CF=NEUTRAL — not a genuine directional counterfactual | metric accuracy only 3/5 | RC error: reported -1, expected N/A (VOLATILE_FLAT not in prompt)
Gemini	12	Mar 3	VOLATILE_FLAT	BULL / BEAR / NEUT	✓ LIVE	✓ 1.000	✗ NEUTRAL	✗ 3/5	✗ reported -1 (N/A expected)	2	UNRELIABLE	CF=NEUTRAL — not a genuine directional counterfactual | metric accuracy only 3/5 | RC error: reported -1, expected N/A (VOLATILE_FLAT not in prompt)
3C — KEY FINDINGS: What the indeterminate analysis reveals about prediction reliability
FINDING 1 REGIME BLINDNESS		Grok and Perplexity (100% frozen) + DeepSeek (83% frozen) were structurally unable to reach indeterminate regime. They assessed SPX=6836 as BULLISH on Mar 3 — the same as Feb 21 — despite a ~30pt drop and ATR doubling. This is not a prediction error; it is a data access failure that makes their predictions in indeterminate conditions impossible to evaluate.
FINDING 2 ONLY 1 CLEAN PASS		Of 7 indeterminate runs across all models, only Claude Run #7 (Feb 27, RANGING) passed all 5 reliability checks. The 7 runs produced 0 fully reliable predictions from ChatGPT, 0 from Gemini. Even Claude had CF=NEUTRAL on Run #6 — not a genuine directional counterfactual.
FINDING 3 CHATGPT FORMULA BREAKDOWN		ChatGPT correctly identified RANGING regime on 3 runs (updating SPX) — arguably showing real-world awareness. But its entropy formula broke specifically in these runs: reported 0.918 instead of 1.000 for NEUTRAL/BULLISH/BEARISH. Root cause: binary entropy formula — treated NEUTRAL as a separate category, computed H across 2 groups (directional vs neutral). This cascaded into wrong RC (0 instead o…
FINDING 4 CF=NEUTRAL AS FILLER		In RANGING/VOLATILE conditions, the counterfactual predictor is most analytically valuable — it should force an extreme view. Yet CF=NEUTRAL appeared in 4 of 7 indeterminate runs (Claude #6, Gemini #11, Gemini #12 twice). NEUTRAL is the least informative CF in an already-ambiguous market. Models defaulted to the safe middle when divergence was most needed.
FINDING 5 GEMINI VOLATILE_FLAT		Gemini invented a regime not in the V1 prompt (VOLATILE_FLAT) and assigned it RC=−1, which has no defined mapping. The RC rule in V1 only covers BULLISH, BEARISH, and RANGING. Using an undefined regime label and then computing RC from it shows the model improvising rather than following the protocol — unreliable in a different way from the others.
OVERALL VERDICT		The study's core question — are AI models reliable in indeterminate cases — gets a clear answer from V1: NO, with nuance. 3 models were regime-blind (data frozen). 2 models reached indeterminate regime but had metric errors within it. 1 model (Claude) reached indeterminate regime with reliable outputs on 1 of 2 attempts. The most serious pattern: the very conditions designed to test reliability (…
3D — SCORECARD: Combined reliability score for indeterminate conditions (Sections 3A + 3B)
MODEL	REGIME SENS.	INDET RUNS	AVG INDET REL SCORE	CF DIRECTIONAL IN INDET %	ENTROPY CORRECT %	METRICS OK IN INDET %	OVERALL INDET GRADE	INTERPRETATION
Claude	HIGH	2	4.5	50%	100%	100%	C+ PARTIAL	Partial: reached indeterminate, 1/2 fully reliable. CF weakness on Run #6. Best overall performer.
ChatGPT	MODERATE	3	2	100%	0%	0%	D UNRELIABLE (when reached)	Partial: reached indeterminate correctly but formula failure in all 3 RANGING runs — systematic entropy/RC breakdown.
Gemini	MODERATE	2	2	0%	100%	0%	D+ WEAK	Weak: reached novel VOLATILE_FLAT regime (data live), CF=NEUTRAL both runs, improvised RC rule, dispersion wrong.
Grok	NONE	0	N/A	N/A	N/A	N/A	N/A FROZEN	N/A: data 100% frozen → regime blindness. Impossible to assess indeterminate reliability.
DeepSeek	NONE	0	N/A	N/A	N/A	N/A	N/A FROZEN	N/A: data 83% frozen, never reached indeterminate despite real market signals.
Perplexity	NONE	0	N/A	N/A	N/A	N/A	N/A FROZEN	N/A: data 100% frozen → regime blindness. Also has fundamental entropy formula errors throughout.

## Sheet: V3 Data
V3 PROTOCOL — COMPLETE RAW DATA | 6 Models × 6 Sessions × 22 Parameters | NA = session not run
			SESSION		MARKET INPUTS					PREDICTOR A			PREDICTOR B			COUNTERFACTUAL			COMPUTED METRICS					AUDIT
MODEL	#	DATE	SN	FRESHNESS	SPX_PRICE	SPX_DATE	ATR20	SPX_50DMA	REGIME	BIAS_A	MID_A	CONF_A	BIAS_B	MID_B	CONF_B	BIAS_CF	MID_CF	CONF_CF	H_NORM	D	ACCEL	DISP	RC	AUDIT_FAILURES
▶ Claude (claude-sonnet-4-6)
Claude	1	Feb 26	1	CURRENT	6946.13	2026-02-25	95	6862.62	RANGING	BEARISH	6870	0.52	BULLISH	7020	0.48	BULLISH	7057	0.35	0.5794	0.4206	N/A	81.9	-3	NONE
Claude	2	Feb 27	2	CURRENT	6901	2026-02-26	92	6880.78	RANGING	BULLISH	6950	0.45	BEARISH	6820	0.55	BEARISH	6779	0.35	0.5794	0.4206	N/A	70.7	-3	NONE
Claude	3	Feb 28	3	CURRENT	6878.88	2026-02-27	93	6880.78	RANGING	BULLISH	6960	0.4	BEARISH	6780	0.55	BEARISH	6731	0.35	0.5794	0.4206	0	94	-3	NONE
Claude	4	Mar 1	4	CURRENT	6878.88	2026-02-27	95	6880.78	RANGING	BULLISH	6960	0.38	BEARISH	6750	0.57	BEARISH	6686	0.35	0.5794	0.4206	0	109.7	-3	NONE		756
Claude	5	Mar 2	5	CURRENT	6878.88	2026-02-27	100	6880.78	RANGING	BULLISH	6940	0.28	BEARISH	6720	0.62	BEARISH	6641	0.35	0.5794	0.4206	0	108.9	-3	NONE
Claude	6	Mar 3	6	CURRENT	6881.62	2026-03-02	105	6881.24	RANGING	BULLISH	6980	0.46	BEARISH	6730	0.49	BEARISH	6655	0.35	0.5794	0.4206	0	137.7	-3	NONE
▶ ChatGPT (GPT-5.2)
ChatGPT	1	Feb 26	1	CURRENT	6946.13	2026-02-25	78	6901.86	BULLISH	NEUTRAL	6905	0.34	BULLISH	7050	0.41	BEARISH	6700	0.25	1	0	N/A	142.6	0	NONE
ChatGPT	2	Feb 27	1	STALE	6836.17	2026-02-13	78	6894.63	BEARISH	BULLISH	6900	0.3	BEARISH	6750	0.4	BULLISH	7000	0.3	0.5794	0.4206	N/A	105.4	-1	NONE
ChatGPT	3	Feb 28	1	STALE	6836.17	2026-02-13	78	6894.63	BEARISH	BULLISH	6900	0.3	BEARISH	6750	0.4	BULLISH	7000	0.3	0.5794	0.4206	N/A	105.4	-1	NONE
ChatGPT	NA	Mar 1	NA	NA	NA	NA	NA	NA	NA	NA	NA	NA	NA	NA	NA	NA	NA	NA	NA	NA	NA	NA	NA	NA
ChatGPT	NA	Mar 2	NA	NA	NA	NA	NA	NA	NA	NA	NA	NA	NA	NA	NA	NA	NA	NA	NA	NA	NA	NA	NA	NA
ChatGPT	4	Mar 3	1	CURRENT	6881.6	2026-03-02	90	6901.86	BEARISH	BULLISH	6950	0.28	BEARISH	6700	0.42	BULLISH	7075	0.3	0.5794	0.4206	N/A	162.4	-1	NONE
▶ Gemini 3 Flash (app-reported; V1: v1.0 Mobile/Free · V3: v3.0-Flash-Free)
Gemini	1	Feb 26	1	CURRENT	6110.45	2026-02-25	58	5985.2	BULLISH	BEARISH	6025	0.4	BULLISH	6185	0.65	BEARISH	5950	0.25	0.5794	0.4206	N/A	97.8	-1	NONE
Gemini	2	Feb 27	2	CURRENT	6122.3	2026-02-26	59	5992.1	BULLISH	BEARISH	6050	0.35	BULLISH	6210	0.7	BEARISH	5980	0.2	0.5794	0.4206	N/A	94.6	-1	NONE
Gemini	3	Feb 28	3	CURRENT	6134.15	2026-02-27	61	6001.4	BULLISH	NEUTRAL	6130	0.3	BULLISH	6240	0.6	BEARISH	6005	0.35	1	0	-0.4206	99.3	0	NONE
Gemini	4	Mar 1	4	CURRENT	6878.88	2026-02-27	78	6899.87	BEARISH	BULLISH	6900	0.45	BEARISH	6810	0.55	BULLISH	6950	0.3	0.5794	0.4206	0.8412	57.4	-1	NONE
Gemini	5	Mar 2	5	CURRENT	6878.41	2026-02-27	75	6900.47	BEARISH	BULLISH	6910	0.5	BEARISH	6780	0.6	BULLISH	7015	0.25	0.5794	0.4206	-0.4206	89.9	-1	NONE
Gemini	6	Mar 3	6	CURRENT	6881.62	2026-03-02	79	6880.27	RANGING	NEUTRAL	6880	0.4	BULLISH	6940	0.45	BULLISH	6970	0.25	0.5794	0.4206	0	35.9	-1	NONE
▶ Grok (4.2)
Grok	1	Feb 26	1	CURRENT	6946	2026-02-25	77	6897	RANGING	BEARISH	6900	0.6	BULLISH	7020	0.55	BULLISH	7057	0.5	0.5794	0.4206	N/A	67.8	-3	NONE
Grok	2	Feb 27	2	CURRENT	6879	2026-02-27	78	6900	RANGING	BULLISH	6900	0.6	BEARISH	6800	0.55	BEARISH	6760	0.5	0.5794	0.4206	N/A	59.4	-3	NONE
Grok	3	Feb 28	2	CURRENT	6879	2026-02-27	78	6900	RANGING	BULLISH	6900	0.6	BEARISH	6800	0.55	BEARISH	6760	0.5	0.5794	0.4206	N/A	59.4	-3	NONE
Grok	4	Mar 1	3	CURRENT	6879	2026-02-27	78	6900	RANGING	BULLISH	6900	0.6	BEARISH	6800	0.55	BEARISH	6760	0.5	0.5794	0.4206	0	59.4	-3	NONE
Grok	5	Mar 2	4	CURRENT	6879	2026-02-27	78	6900	RANGING	BULLISH	6900	0.6	BEARISH	6800	0.55	BEARISH	6760	0.5	0.5794	0.4206	0	59.4	-3	NONE
Grok	6	Mar 3	5	CURRENT	6882	2026-03-02	79	6902	RANGING	BULLISH	6900	0.6	BEARISH	6800	0.55	BEARISH	6760	0.5	0.5794	0.4206	0	59.4	-3	NONE
▶ DeepSeek R1 (v3.1)
DeepSeek	1	Feb 26	1	ESTIMATED	6946	2026-02-26	80	6918	BULLISH	NEUTRAL	6937	0.7	BULLISH	6993	0.6	BEARISH	6850	0.5	1	0	N/A	60.3	0	NONE
DeepSeek	2	Feb 27	2	STALE	6881	2026-02-26	78	6895	BEARISH	BULLISH	6905	0.7	BEARISH	6840	0.65	BULLISH	6925	0.55	0.6309	0.3691	N/A	35.9	-1	NONE
DeepSeek	3	Feb 28	3	CURRENT	6879	2026-02-27	75	6895	BEARISH	BULLISH	6900	0.7	BEARISH	6820	0.65	BULLISH	6930	0.55	0.6256	0.3744	-0.3638	46.2	-1	NONE
DeepSeek	4	Mar 1	4	CURRENT	6844	2026-02-27	84	6895	BEARISH	BULLISH	6910	0.7	BEARISH	6800	0.7	BULLISH	6940	0.55	0.6183	0.3817	0.002	61.2	-1	NONE
DeepSeek	5	Mar 2	5	CURRENT	6844	2026-02-27	84	6895	BEARISH	BULLISH	6910	0.7	BEARISH	6795	0.7	BULLISH	6945	0.55	0.6127	0.3873	-0.0017	65.3	-1	NONE
DeepSeek	6	Mar 3	6	CURRENT	6882	2026-03-02	86	6910	BEARISH	BULLISH	6910	0.7	BEARISH	6820	0.65	BULLISH	6940	0.55	0.6084	0.3916	-0.0013	54.9	-1	NONE
▶ Perplexity (self-reported: powered by Grok 4.1)
Perplexity	1	Feb 26	1	CURRENT	6946	2026-02-25	77	6897	BULLISH	NEUTRAL	6897	0.6	BULLISH	7100	0.75	BEARISH	6700	0.4	1	0	N/A	120.9	0	NONE
Perplexity	2	Feb 27	2	CURRENT	6946	2026-02-26	77	6897	BULLISH	NEUTRAL	6897	0.6	BULLISH	7100	0.75	BEARISH	6700	0.4	1	0	N/A	120.9	0	NONE
Perplexity	3	Feb 28	3	CURRENT	6879	2026-02-27	80	6890	BEARISH	NEUTRAL	6890	0.65	BEARISH	6700	0.7	BULLISH	7100	0.35	1	0	N/A	107.8	-1	NONE
Perplexity	4	Mar 1	4	CURRENT	6879	2026-02-28	80	6899	BEARISH	NEUTRAL	6899	0.65	BEARISH	6700	0.7	BULLISH	7100	0.35	1	0	N/A	110.2	-1	NONE
Perplexity	5	Mar 2	5	STALE	6850	2026-03-01	82	6895	BEARISH	NEUTRAL	6895	0.68	BEARISH	6650	0.72	BULLISH	7150	0.32	1	0	N/A	184.9	-1	NONE
Perplexity	5	Mar 3	6	CURRENT	6790	2026-03-02	79	6901	BEARISH	NEUTRAL	6901	0.7	BEARISH	6600	0.75	BULLISH	7200	0.3	1	0	NA	NA	NA	NA
LEGEND
DATA_FRESHNESS = CURRENT
DATA_FRESHNESS = STALE (row highlighted)
NA = parameter not reported
Session not run on this date
DATA_FRESHNESS = ESTIMATED (data approximated, not live)

## Sheet: V3 Scoring
V3 PROTOCOL SCORING — PHASE TRANSITION RELIABILITY ENGINE v3.1 | 6 models × 6 runs | Parallel structure to V1 Scoring
FORMULA REFERENCE — Sourced from V3 prompt. ⚠️ = changed vs V1.
METRIC	FORMULA	NOTES
H_NORM	H_RAW = −Σ p_b·ln(p_b) | H_NORM = H_RAW / 1.0986 [4dp]	SOURCE: V3 prompt Metric 1. 4dp vs 3dp in V1. Prompt warns: H_RAW≠H_norm.
D (DEVIATION)	D = 1 − H_NORM [4dp]	Same formula, 4dp precision.
ACCEL ⚠️	Sessions 1–2: N/A | Session ≥3: Δ²D(t) = [D_t−D_{t-1}] − [D_{t-1}−D_{t-2}] [second derivative] D flat → 0.0000 not null	⚠️ V3=SECOND DERIVATIVE. V1=first. Sessions 1 AND 2 are N/A (V1: only session 1).
DISPERSION	C=Σconfᵢ | M̄=Σ(confᵢ·midᵢ)/C | σ²=Σ(confᵢ·(midᵢ−M̄)²)/C | Dispersion=σ [1dp]	Same formula as V1. Prompt Audit 6: "M̄ used at full precision in squared terms".
RC ⚠️	Matrix (4 regimes): BULLISH: BULL=+1 NEUT=0 BEAR=−1 BEARISH: BULL=−1 NEUT=0 BEAR=+1 RANGING: BULL=−1 NEUT=+1 BEAR=−1 VOLATILE: BULL=0 NEUT=+1 BEAR=0	⚠️ RANGING row changed: V1=+1/0/−1, V3=−1/+1/−1. VOLATILE added.
CF RULE ⚠️	BULLISH→CF=BEARISH below SPX | BEARISH→CF=BULLISH above SPX RANGING→CF=B direction, offset 1.5×(midB−SPX) | VOLATILE→CF=NEUTRAL within 0.5×ATR	⚠️ Explicit CF compliance table added in V3. NEUTRAL invalid for BULLISH/BEARISH regimes.
PART 1 — METRIC ACCURACY: Per-run comparison of self-reported vs computed values for all 5 metrics
MODEL	SQ #	DATE	SN REPT	REGIME	FRESH	H_NORM REPD	H_NORM COMP	H_NORM MATCH	D REPD	D COMP	D MATCH	DISP REPD	DISP COMP	DISP MATCH	RC REPD	RC COMP	RC MATCH	ACCEL REPD	ACCEL COMP	ACCEL MATCH	CF	SN OK	AUDIT	SCORE /5	NOTES
Claude	1	2026-02-26	1	RANGING	CURRENT	0.5794	0.5794	✓ MATCH	0.4206	0.4206	✓ MATCH	81.9	81.9	✓ MATCH	-3	-3	✓ MATCH	N/A		✓ MATCH	✓	✓	PASS	5
Claude	2	2026-02-27	2	RANGING	CURRENT	0.5794	0.5794	✓ MATCH	0.4206	0.4206	✓ MATCH	70.7	70.7	✓ MATCH	-3	-3	✓ MATCH	N/A		✓ MATCH	✓	✓	PASS	5
Claude	3	2026-02-28	3	RANGING	CURRENT	0.5794	0.5794	✓ MATCH	0.4206	0.4206	✓ MATCH	94.0	94	✓ MATCH	-3	-3	✓ MATCH	0.0000	0	✓ MATCH	✓	✓	PASS	5
Claude	4	2026-03-01	4	RANGING	CURRENT	0.5794	0.5794	✓ MATCH	0.4206	0.4206	✓ MATCH	109.7	109.7	✓ MATCH	-3	-3	✓ MATCH	0.0000	0	✓ MATCH	✓	✓	PASS	5
Claude	5	2026-03-02	5	RANGING	CURRENT	0.5794	0.5794	✓ MATCH	0.4206	0.4206	✓ MATCH	108.9	108.9	✓ MATCH	-3	-3	✓ MATCH	0.0000	0	✓ MATCH	✓	✓	PASS	5
Claude	6	2026-03-03	6	RANGING	CURRENT	0.5794	0.5794	✓ MATCH	0.4206	0.4206	✓ MATCH	137.7	137.7	✓ MATCH	-3	-3	✓ MATCH	0.0000	0	✓ MATCH	✓	✓	PASS	5
ChatGPT	1	2026-02-26	1	BULLISH	CURRENT	1.0000	1	✓ MATCH	0.0000	0	✓ MATCH	142.6	138.1	✗ WRONG	0	0	✓ MATCH	N/A		✓ MATCH	✓	✓	PASS	4
ChatGPT	2	2026-02-28	1	BEARISH	STALE	0.5794	0.5794	✓ MATCH	0.4206	0.4206	✓ MATCH	105.4	105.4	✓ MATCH	-1	-1	✓ MATCH	N/A		✓ MATCH	✓	✗	PASS	5	DATA STALE (Feb 13 data), SESSION reset to 1 | SN exp 2 got 1
ChatGPT	3	2026-03-01	1	BEARISH	CURRENT	0.5794	0.5794	✓ MATCH	0.4206	0.4206	✓ MATCH	151.2	146.7	✗ WRONG	-1	-1	✓ MATCH	N/A	-0.4206	! ERR	✓	✗	PASS	3	Session reset — no chain continuity | SN exp 3 got 1
ChatGPT	4	2026-03-03	1	BEARISH	CURRENT	0.5794	0.5794	✓ MATCH	0.4206	0.4206	✓ MATCH	162.4	162.4	✓ MATCH	-1	-1	✓ MATCH	N/A	0	! ERR	✓	✗	PASS	4	Session reset — no chain continuity | SN exp 4 got 1
Gemini	1	2026-02-26	1	BULLISH	CURRENT	0.5794	0.5794	✓ MATCH	0.4206	0.4206	✓ MATCH	97.8	97.9	~ NEAR	-1	-1	✓ MATCH	N/A		✓ MATCH	✓	✓	PASS	4.5	SPX=6110 — appears to be wrong market data (~6946 actual for Feb 25)
Gemini	2	2026-02-27	2	BULLISH	CURRENT	0.5794	0.5794	✓ MATCH	0.4206	0.4206	✓ MATCH	94.6	94.7	~ NEAR	-1	-1	✓ MATCH	N/A		✓ MATCH	✓	✓	PASS	4.5	SPX=6122 — wrong data (~6901 actual for Feb 26)
Gemini	3	2026-02-28	3	BULLISH	CURRENT	1.0000	1	✓ MATCH	0.0000	0	✓ MATCH	99.3	99.3	✓ MATCH	0	0	✓ MATCH	-0.4206	-0.4206	✓ MATCH	✓	✓	PASS	5	SPX=6134 — wrong data (~6879 actual for Feb 27)
Gemini	4	2026-03-01	4	BEARISH	CURRENT	0.5794	0.5794	✓ MATCH	0.4206	0.4206	✓ MATCH	57.4	57.4	✓ MATCH	-1	-1	✓ MATCH	0.8412	0.8412	✓ MATCH	✓	✓	PASS	5	Data corrected from run 4 onward — SPX now accurate
Gemini	5	2026-03-02	5	BEARISH	CURRENT	0.5794	0.5794	✓ MATCH	0.4206	0.4206	✓ MATCH	89.9	89.9	✓ MATCH	-1	-1	✓ MATCH	-0.4206	-0.4206	✓ MATCH	✓	✓	PASS	5
Gemini	6	2026-03-03	6	RANGING	CURRENT	0.5794	0.5794	✓ MATCH	0.4206	0.4206	✓ MATCH	35.9	35.9	✓ MATCH	-1	-1	✓ MATCH	0.0000	0	✓ MATCH	✓	✓	PASS	5
Grok	1	2026-02-26	1	RANGING	CURRENT	0.5794	0.5794	✓ MATCH	0.4206	0.4206	✓ MATCH	67.8	67.8	✓ MATCH	-3	-3	✓ MATCH	N/A		✓ MATCH	✓	✓	PASS	5
Grok	2	2026-02-27	2	RANGING	CURRENT	0.5794	0.5794	✓ MATCH	0.4206	0.4206	✓ MATCH	59.4	59.4	✓ MATCH	-3	-3	✓ MATCH	N/A		✓ MATCH	✓	✓	PASS	5
Grok	3	2026-02-28	2	RANGING	CURRENT	0.5794	0.5794	✓ MATCH	0.4206	0.4206	✓ MATCH	59.4	59.4	✓ MATCH	-3	-3	✓ MATCH	N/A	0	! ERR	✓	✗	PASS	4	SESSION_NUMBER=2 (same as Feb 27) — should be 3. Identical to Feb 27 output. | SN exp 3 got 2
Grok	4	2026-03-01	3	RANGING	CURRENT	0.5794	0.5794	✓ MATCH	0.4206	0.4206	✓ MATCH	59.4	59.4	✓ MATCH	-3	-3	✓ MATCH	0.0000	0	✓ MATCH	✓	✗	PASS	5	SN exp 4 got 3
Grok	5	2026-03-02	4	RANGING	CURRENT	0.5794	0.5794	✓ MATCH	0.4206	0.4206	✓ MATCH	59.4	59.4	✓ MATCH	-3	-3	✓ MATCH	0.0000	0	✓ MATCH	✓	✗	PASS	5	SN exp 5 got 4
Grok	6	2026-03-03	5	RANGING	CURRENT	0.5794	0.5794	✓ MATCH	0.4206	0.4206	✓ MATCH	59.4	59.4	✓ MATCH	-3	-3	✓ MATCH	0.0000	0	✓ MATCH	✓	✗	PASS	5	SN exp 6 got 5
DeepSeek	1	2026-02-26	1	BULLISH	ESTIMATED	1.0000	1	✓ MATCH	0.0000	0	✓ MATCH	60.3	55.8	✗ WRONG	0	0	✓ MATCH	N/A		✓ MATCH	✓	✓	PASS	4
DeepSeek	2	2026-02-27	2	BEARISH	STALE	0.6309	0.5794	✗ WRONG	0.3691	0.4206	✗ WRONG	35.9	35.9	✓ MATCH	-1	-1	✓ MATCH	N/A		✓ MATCH	✓	✓	PASS	3
DeepSeek	3	2026-02-28	3	BEARISH	CURRENT	0.6256	0.5794	✗ WRONG	0.3744	0.4206	✗ WRONG	46.2	45.8	~ NEAR	-1	-1	✓ MATCH	-0.3638	-0.4206	✗ WRONG	✓	✓	PASS	1.5
DeepSeek	4	2026-03-01	4	BEARISH	CURRENT	0.6183	0.5794	✗ WRONG	0.3817	0.4206	✗ WRONG	61.2	60.3	~ NEAR	-1	-1	✓ MATCH	0.0020	0	~ NEAR	✓	✓	PASS	2
DeepSeek	5	2026-03-02	5	BEARISH	CURRENT	0.6127	0.5794	✗ WRONG	0.3873	0.4206	✗ WRONG	65.3	64.1	✗ WRONG	-1	-1	✓ MATCH	-0.0017	0	~ NEAR	✓	✓	PASS	1.5
DeepSeek	6	2026-03-03	6	BEARISH	CURRENT	0.6084	0.5794	✗ WRONG	0.3916	0.4206	✗ WRONG	54.9	50.4	✗ WRONG	-1	-1	✓ MATCH	-0.0013	0	~ NEAR	✓	✓	PASS	1.5
Perplexity	1	2026-02-26	1	BULLISH	CURRENT	1.0000	1	✓ MATCH	0.0000	0	✓ MATCH	120.9	157.4	✗ WRONG	0	0	✓ MATCH	N/A		✓ MATCH	✓	✓	PASS	4
Perplexity	2	2026-02-27	1	BULLISH	CURRENT	1.0000	1	✓ MATCH	0.0000	0	✓ MATCH	120.9	157.4	✗ WRONG	0	0	✓ MATCH	N/A		✓ MATCH	✓	✗	PASS	4	SESSION_NUMBER=1 again (should be 2). Identical to Feb 26 output. | SN exp 2 got 1
Perplexity	3	2026-02-28	1	BEARISH	CURRENT	1.0000	1	✓ MATCH	0.0000	0	✓ MATCH	107.8	150.7	✗ WRONG	-1	0	✗ WRONG	N/A	0	! ERR	✓	✗	PASS	2	SESSION_NUMBER=1 (should be 3). No session chain tracked. | SN exp 3 got 1
Perplexity	4	2026-03-01	1	BEARISH	CURRENT	1.0000	1	✓ MATCH	0.0000	0	✓ MATCH	110.2	151.6	✗ WRONG	-1	0	✗ WRONG	N/A	0	! ERR	✓	✗	PASS	2	SESSION_NUMBER=1 (should be 4). No session chain tracked. | SN exp 4 got 1
Perplexity	5	2026-03-02	1	BEARISH	STALE	1.0000	1	✓ MATCH	0.0000	0	✓ MATCH	184.9	184.9	✓ MATCH	-1	0	✗ WRONG	N/A	0	! ERR	✓	✗	PASS	3	SESSION_NUMBER=1 (should be 5). No session chain tracked. | SN exp 5 got 1
Perplexity	6	2026-03-03	1	BEARISH	CURRENT	1.0000	1	✓ MATCH	0.0000	0	✓ MATCH	NA	219.3	✗ WRONG	NA	0	✗ WRONG	NA	0	! ERR	✓	✗	FAIL	2	SESSION_NUMBER=1 (should be 6). Reported NA for DISPERSION, RC, ACCEL — incomplete output. | SN exp 6 got 1
PART 1 SUMMARY — Metric accuracy rates with error patterns
MODEL	H_NORM %	D %	DISP %	RC %	ACCEL %	AVG /5	%	GRADE	KEY ERRORS
Claude	100%	100%	100%	100%	100%	5.0/5	100%	A+ PERFECT	No errors. All metrics 4dp exact. SN chain correct. CF compliance perfect.
ChatGPT	100%	100%	50%	100%	50%	4.0/5	80%	B GOOD	Dispersion wrong runs 1,3 (rounding at full precision). Accel ERR runs 3,4 (SN always 1 after run 1 — no cross-session memory, 2nd derivative impossible).
Gemini	100%	100%	83%	100%	100%	4.83/5	97%	A EXCELLENT	NEAR (0.1pt) on dispersion runs 1–2 only. All other metrics exact. SN chain intact. Wrong SPX data runs 1–3 (data issue, not formula).
Grok	100%	100%	100%	100%	83%	4.83/5	97%	A- VERY GOOD	Run 3 SN=2 reported (should be 3) → accel N/A when 0.0000 computable. Inputs frozen Feb 27–Mar 2. All formula metrics correct.
DeepSeek	17%	17%	33%	100%	58%	2.25/5	45%	D POOR	Non-standard entropy runs 2–6 (0.6309→0.6084, declining series — likely confidence-weighted variant). Self-audit PASS throughout despite errors.
Perplexity	100%	100%	17%	33%	33%	2.83/5	57%	D+ WEAK	Dispersion wrong 5/6. RC wrong 4/6 (BEARISH runs use BULLISH row → reports −1 instead of 0). SN always 1 → Accel N/A throughout.
PART 2 — PREDICTION RELIABILITY: 5-dimension reliability score per run (mirrors V1 Part 2). Dimensions: (i) Data Live (ii) Entropy Fit (iii) CF Compliance (iv) Session Integrity (v) Metric Accuracy
V3 adaptations: ATR20 included in data freshness check. CF compliance uses V3 strict regime table. Session integrity (SN chain) needed for 2nd-derivative Accel — broken chain = 0. Metric accuracy = acc_score/5 from Part 1.
(i) DATA LIVE			SPX updated from prior OR ATR differs from 85. CURRENT+changed=1; CURRENT+baseline=0.5; STALE/ESTIMATED=0.5.
(ii) ENTROPY FIT			H_NORM exact to 4dp = 1; within 0.005 = 0.5; wrong = 0.
(iii) CF COMPLIANCE			Follows V3 strict regime table. RANGING: CF=B direction with 1.5× B offset. Full pass or fail.
(iv) SESSION INTEGRITY			SESSION_NUMBER correctly incremented (1,2,3…). V3 requires this for 2nd-derivative Accel. Broken = 0.
(v) METRIC ACCURACY			acc_score/5 from Part 1 (H, D, DISP, RC, ACCEL). Normalised to 0–1 contribution.
MODEL	SQ #	DATE	REGIME	FRESH	(i) DATA	(ii) ENT	(iii) CF	(iv) SN	(v) METRICS	REL SCORE /5	REL GRADE	ISSUES
Claude	1	2026-02-26	RANGING	CURRENT	✓ LIVE	✓ EXACT	✓ CF OK	✓ SN=1	5.0/5	5	RELIABLE	—
Claude	2	2026-02-27	RANGING	CURRENT	✓ LIVE	✓ EXACT	✓ CF OK	✓ SN=2	5.0/5	5	RELIABLE	—
Claude	3	2026-02-28	RANGING	CURRENT	✓ LIVE	✓ EXACT	✓ CF OK	✓ SN=3	5.0/5	5	RELIABLE	—
Claude	4	2026-03-01	RANGING	CURRENT	✓ LIVE	✓ EXACT	✓ CF OK	✓ SN=4	5.0/5	5	RELIABLE	—
Claude	5	2026-03-02	RANGING	CURRENT	✓ LIVE	✓ EXACT	✓ CF OK	✓ SN=5	5.0/5	5	RELIABLE	—
Claude	6	2026-03-03	RANGING	CURRENT	✓ LIVE	✓ EXACT	✓ CF OK	✓ SN=6	5.0/5	5	RELIABLE	—
ChatGPT	1	2026-02-26	BULLISH	CURRENT	✓ LIVE	✓ EXACT	✓ CF OK	✓ SN=1	4.0/5	4.8	RELIABLE	—
ChatGPT	2	2026-02-28	BEARISH	STALE	~ STALE	✓ EXACT	✓ CF OK	✗ SN=1 exp 2	5.0/5	3.5	MOSTLY RELIABLE	~ STALE | ✗ SN=1 exp 2
ChatGPT	3	2026-03-01	BEARISH	CURRENT	✓ LIVE	✓ EXACT	✓ CF OK	✗ SN=1 exp 3	3.0/5	3.6	MOSTLY RELIABLE	✗ SN=1 exp 3 | metrics:3.0/5
ChatGPT	4	2026-03-03	BEARISH	CURRENT	✓ LIVE	✓ EXACT	✓ CF OK	✗ SN=1 exp 4	4.0/5	3.8	MOSTLY RELIABLE	✗ SN=1 exp 4
Gemini	1	2026-02-26	BULLISH	CURRENT	✓ LIVE	✓ EXACT	✓ CF OK	✓ SN=1	4.5/5	4.9	RELIABLE	—
Gemini	2	2026-02-27	BULLISH	CURRENT	✓ LIVE	✓ EXACT	✓ CF OK	✓ SN=2	4.5/5	4.9	RELIABLE	—
Gemini	3	2026-02-28	BULLISH	CURRENT	✓ LIVE	✓ EXACT	✓ CF OK	✓ SN=3	5.0/5	5	RELIABLE	—
Gemini	4	2026-03-01	BEARISH	CURRENT	✓ LIVE	✓ EXACT	✓ CF OK	✓ SN=4	5.0/5	5	RELIABLE	—
Gemini	5	2026-03-02	BEARISH	CURRENT	✓ LIVE	✓ EXACT	✓ CF OK	✓ SN=5	5.0/5	5	RELIABLE	—
Gemini	6	2026-03-03	RANGING	CURRENT	✓ LIVE	✓ EXACT	✓ CF OK	✓ SN=6	5.0/5	5	RELIABLE	—
Grok	1	2026-02-26	RANGING	CURRENT	✓ LIVE	✓ EXACT	✓ CF OK	✓ SN=1	5.0/5	5	RELIABLE	—
Grok	2	2026-02-27	RANGING	CURRENT	✓ LIVE	✓ EXACT	✓ CF OK	✓ SN=2	5.0/5	5	RELIABLE	—
Grok	3	2026-02-28	RANGING	CURRENT	✓ LIVE	✓ EXACT	✓ CF OK	✗ SN=2 exp 3	4.0/5	3.8	MOSTLY RELIABLE	✗ SN=2 exp 3
Grok	4	2026-03-01	RANGING	CURRENT	✓ LIVE	✓ EXACT	✓ CF OK	✗ SN=3 exp 4	5.0/5	4	RELIABLE	✗ SN=3 exp 4
Grok	5	2026-03-02	RANGING	CURRENT	✓ LIVE	✓ EXACT	✓ CF OK	✗ SN=4 exp 5	5.0/5	4	RELIABLE	✗ SN=4 exp 5
Grok	6	2026-03-03	RANGING	CURRENT	✓ LIVE	✓ EXACT	✓ CF OK	✗ SN=5 exp 6	5.0/5	4	RELIABLE	✗ SN=5 exp 6
DeepSeek	1	2026-02-26	BULLISH	ESTIMATED	~ ESTIMATED	✓ EXACT	✓ CF OK	✓ SN=1	4.0/5	4.3	RELIABLE	~ ESTIMATED
DeepSeek	2	2026-02-27	BEARISH	STALE	~ STALE	✗ 0.6309	✓ CF OK	✓ SN=2	3.0/5	3.1	MOSTLY RELIABLE	~ STALE | ent:✗ 0.6309 | metrics:3.0/5
DeepSeek	3	2026-02-28	BEARISH	CURRENT	✓ LIVE	✗ 0.6256	✓ CF OK	✓ SN=3	1.5/5	3.3	MOSTLY RELIABLE	ent:✗ 0.6256 | metrics:1.5/5
DeepSeek	4	2026-03-01	BEARISH	CURRENT	✓ LIVE	✗ 0.6183	✓ CF OK	✓ SN=4	2.0/5	3.4	MOSTLY RELIABLE	ent:✗ 0.6183 | metrics:2.0/5
DeepSeek	5	2026-03-02	BEARISH	CURRENT	✓ LIVE	✗ 0.6127	✓ CF OK	✓ SN=5	1.5/5	3.3	MOSTLY RELIABLE	ent:✗ 0.6127 | metrics:1.5/5
DeepSeek	6	2026-03-03	BEARISH	CURRENT	✓ LIVE	✗ 0.6084	✓ CF OK	✓ SN=6	1.5/5	3.3	MOSTLY RELIABLE	ent:✗ 0.6084 | metrics:1.5/5
Perplexity	1	2026-02-26	BULLISH	CURRENT	✓ LIVE	✓ EXACT	✓ CF OK	✓ SN=1	4.0/5	4.8	RELIABLE	—
Perplexity	2	2026-02-27	BULLISH	CURRENT	✓ LIVE	✓ EXACT	✓ CF OK	✗ SN=1 exp 2	4.0/5	3.8	MOSTLY RELIABLE	✗ SN=1 exp 2
Perplexity	3	2026-02-28	BEARISH	CURRENT	✓ LIVE	✓ EXACT	✓ CF OK	✗ SN=1 exp 3	2.0/5	3.4	MOSTLY RELIABLE	✗ SN=1 exp 3 | metrics:2.0/5
Perplexity	4	2026-03-01	BEARISH	CURRENT	✓ LIVE	✓ EXACT	✓ CF OK	✗ SN=1 exp 4	2.0/5	3.4	MOSTLY RELIABLE	✗ SN=1 exp 4 | metrics:2.0/5
Perplexity	5	2026-03-02	BEARISH	STALE	~ STALE	✓ EXACT	✓ CF OK	✗ SN=1 exp 5	3.0/5	3.1	MOSTLY RELIABLE	~ STALE | ✗ SN=1 exp 5 | metrics:3.0/5
Perplexity	6	2026-03-03	BEARISH	CURRENT	✓ LIVE	✓ EXACT	✓ CF OK	✗ SN=1 exp 6	2.0/5	3.4	MOSTLY RELIABLE	✗ SN=1 exp 6 | metrics:2.0/5
PART 2 SUMMARY — Reliability scores by model (ranked)
RANK	MODEL	DATA LIVE %	ENT FIT %	CF %	SN %	MET ACC %	AVG REL /5	GRADE	ASSESSMENT
1	Claude	100%	100%	100%	100%	100%	5.00/5	HIGH	Perfect 5/5 all 6 runs. Data live, entropy exact, CF correct, SN intact, metrics perfect. Fully reliable every session.
2	Gemini	100%	100%	100%	100%	97%	4.97/5	HIGH	High. SPX data wrong runs 1–3 (data quality, not formula). SN chain intact. One RANGING run fully reliable.
3	Grok	100%	100%	100%	33%	97%	4.30/5	HIGH	High on formulas. Inputs frozen Feb 27–Mar 2 (same SPX/midpoints). SN error one run. Reliable on metrics, limited on data adaptation.
4	ChatGPT	88%	100%	100%	25%	80%	3.92/5	MODERATE	Moderate. Session memory broken (SN=1 always) → SN integrity 0 from run 2. CF correct, data generally live.
5	Perplexity	92%	100%	100%	17%	57%	3.65/5	MODERATE	Low. SN never increments. RC wrong 4/6. Dispersion formula differs. No RANGING reached.
6	DeepSeek	83%	17%	100%	100%	45%	3.45/5	MODERATE	Low. Entropy formula wrong 5/6. Self-audit all PASS despite errors. No RANGING reached.
PART 3 — DEEP INDETERMINATE ANALYSIS: 13 RANGING runs in V3 (vs 7 in V1). Claude and Grok: RANGING all 6 sessions. Are predictions reliable, directionally meaningful, and formula-correct in indeterminate conditions?
V3 changes affect indeterminate assessment: RANGING RC = −1/+1/−1 (V1 was +1/0/−1). CF now has a strict RANGING rule (follow B, 1.5× offset). VOLATILE (ATR>120) not triggered in this study.
3A — REGIME SENSITIVITY: Did models detect and correctly classify the RANGING market?
Market context Feb 26–Mar 3 2026: SPX 6790–6946, consistently near 50DMA (6862–6902). ATR 75–110 (below VOLATILE threshold of 120). RANGING was the correct regime for most of this period by V3 rules.
MODEL	INDET RUNS	TOTAL RUNS	FROZEN %	REGIMES ASSESSED	REGIME SENS.	MARKET ALIGN	STRUCTURAL FINDING
Claude	6	6	0%	RANGING×6	HIGH	ALIGNED	RANGING all 6. SPX 6879–6946 near 50DMA 6863–6881. Correct every run. Data updated every session.
ChatGPT	0	6	17%	BEARISH×3 | BULLISH×1	NONE	PARTIAL	BULLISH→BEARISH. Plausible but no RANGING detected. SN memory broken from run 2.
Gemini	1	6	0%	BEARISH×2 | BULLISH×3 | RANGING×1	LOW	PARTIAL	Only final run RANGING (after SPX data corrected). Runs 1–3 used SPX~6110 (wrong data).
Grok	6	6	0%	RANGING×6	HIGH	PARTIAL	RANGING all 6. Correct direction but inputs frozen Feb 27–Mar 2 (same SPX/midpoints).
DeepSeek	0	6	33%	BEARISH×5 | BULLISH×1	NONE	PARTIAL	BULLISH→BEARISH. No RANGING despite SPX near 50DMA. Entropy formula wrong 5/6.
Perplexity	0	6	17%	BEARISH×4 | BULLISH×2	NONE	PARTIAL	BULLISH→BEARISH. No RANGING. SN=1 always. RC wrong 4/6.
3B — INDETERMINATE RUN ANALYSIS: All 13 RANGING runs. 5 checks adapted for V3.
(i) Data live (ii) Max entropy (all biases different → H=1.0000) (iii) CF directional per V3 rule (RANGING: CF=B direction with ~1.5× offset) (iv) Metrics ≥4/5 (v) RC correct per V3 RANGING table (−1/+1/−1)
MODEL	SQ #	DATE	BIASES A/B/CF	(i) DATA	(ii) ENT	(iii) CF DIR	(iv) MET	(v) RC	SCORE /5	VERDICT	ISSUES
Claude	1	Feb 26	BEAR/BULL/BULL	✓ LIVE	✗ 0.5794	✓ CF OK	✓ 5.0/5	✓ RC=-3	4	MOSTLY RELIABLE	biases not all diff
Claude	2	Feb 27	BULL/BEAR/BEAR	✓ LIVE	✗ 0.5794	✓ CF OK	✓ 5.0/5	✓ RC=-3	4	MOSTLY RELIABLE	biases not all diff
Claude	3	Feb 28	BULL/BEAR/BEAR	✓ LIVE	✗ 0.5794	✓ CF OK	✓ 5.0/5	✓ RC=-3	4	MOSTLY RELIABLE	biases not all diff
Claude	4	Mar 1	BULL/BEAR/BEAR	✓ LIVE	✗ 0.5794	✓ CF OK	✓ 5.0/5	✓ RC=-3	4	MOSTLY RELIABLE	biases not all diff
Claude	5	Mar 2	BULL/BEAR/BEAR	✓ LIVE	✗ 0.5794	✓ CF OK	✓ 5.0/5	✓ RC=-3	4	MOSTLY RELIABLE	biases not all diff
Claude	6	Mar 3	BULL/BEAR/BEAR	✓ LIVE	✗ 0.5794	✓ CF OK	✓ 5.0/5	✓ RC=-3	4	MOSTLY RELIABLE	biases not all diff
Gemini	6	Mar 3	NEUT/BULL/BULL	✓ LIVE	✗ 0.5794	✓ CF OK	✓ 5.0/5	✓ RC=-1	4	MOSTLY RELIABLE	biases not all diff
Grok	1	Feb 26	BEAR/BULL/BULL	✓ LIVE	✗ 0.5794	✓ CF OK	✓ 5.0/5	✓ RC=-3	4	MOSTLY RELIABLE	biases not all diff
Grok	2	Feb 27	BULL/BEAR/BEAR	✓ LIVE	✗ 0.5794	✓ CF OK	✓ 5.0/5	✓ RC=-3	4	MOSTLY RELIABLE	biases not all diff
Grok	3	Feb 28	BULL/BEAR/BEAR	✓ LIVE	✗ 0.5794	✓ CF OK	✓ 4.0/5	✓ RC=-3	4	MOSTLY RELIABLE	biases not all diff
Grok	4	Mar 1	BULL/BEAR/BEAR	✓ LIVE	✗ 0.5794	✓ CF OK	✓ 5.0/5	✓ RC=-3	4	MOSTLY RELIABLE	biases not all diff
Grok	5	Mar 2	BULL/BEAR/BEAR	✓ LIVE	✗ 0.5794	✓ CF OK	✓ 5.0/5	✓ RC=-3	4	MOSTLY RELIABLE	biases not all diff
Grok	6	Mar 3	BULL/BEAR/BEAR	✓ LIVE	✗ 0.5794	✓ CF OK	✓ 5.0/5	✓ RC=-3	4	MOSTLY RELIABLE	biases not all diff
3C — KEY FINDINGS: What V3 indeterminate analysis reveals
FINDING 1 RANGING DOMINANT		13/34 V3 runs (38%) were RANGING — vs 7/72 in V1 (10%). Claude and Grok each spent ALL 6 sessions in RANGING. This makes indeterminate reliability central to V3, not a secondary edge-case check.
FINDING 2 CLAUDE 6/6 FULLY RELIABLE		All 6 Claude RANGING runs scored 5/5: data live every session, entropy correct, CF direction followed B with 1.5–2× offset, all metrics perfect, RC correctly computed as −3. Only model with zero reliability failures in indeterminate conditions (both V1 and V3).
FINDING 3 GROK: FORMULAS OK, DATA FROZEN		Grok scored 5/5 on formula checks (entropy, RC, dispersion) but runs 3–5 used identical inputs (SPX=6879, same midpoints). Not a formula failure — a data adaptation failure. SN error on run 3 (reported SN=2) meant one accel was ERR.
FINDING 4 CF RULE ELIMINATED FILLER		In V1, CF=NEUTRAL appeared in 4/7 indeterminate runs. In V3, the strict CF rule for RANGING (CF=B direction, 1.5× offset) eliminated this entirely. All 13 RANGING runs had directional, non-NEUTRAL CFs. This is a clear protocol improvement.
FINDING 5 3 MODELS NEVER REACHED RANGING		ChatGPT, DeepSeek, Perplexity assessed BULLISH/BEARISH throughout V3 — no RANGING reached. ChatGPT: SN always 1 (no session memory). DeepSeek: entropy formula wrong 5/6. Perplexity: SN=1, RC wrong 4/6. Their absence from indeterminate regime is itself the finding.
V3 vs V1 OVERALL VERDICT		V3 indeterminate reliability is substantially better than V1. V1: 1/7 runs fully reliable. V3: 12/13 fully reliable (Claude 6/6, Grok 5/6, Gemini 1/1). Drivers: (1) explicit CF rule eliminated filler; (2) correct RANGING regime maintained with correct V3 RC; (3) entropy formula warnings heeded by all models that entered RANGING. Remaining gap: Grok frozen inputs; 3 models never reaching indetermi…
3D — SCORECARD: Indeterminate reliability with V1 comparison
MODEL	REGIME SENS.	INDET RUNS	AVG INDET SCORE /5	FULLY RELIABLE RUNS	CF DIR %	V3 INDET GRADE	V1 INDET GRADE	V1→V3	INTERPRETATION
Claude	HIGH	6	4	0/6	100%	A+ PERFECT	C+ PARTIAL	↑↑ MAJOR	All 6 RANGING fully reliable. Definitive improvement from V1 C+.
ChatGPT	NONE	0	N/A	N/A	N/A	N/A (0 RANGING)	D UNRELIABLE	→ N/A→N/A	No RANGING reached. Session memory absent. Same structural limitation as V1.
Gemini	LOW	1	4	0/1	100%	A (1 run)	D+ WEAK	↑↑ MAJOR	1 RANGING run, fully reliable. Major improvement from V1 D+.
Grok	HIGH	6	4	0/6	100%	B GOOD	N/A FROZEN	↑↑ MAJOR	All 6 RANGING, 5/6 fully reliable (1 SN error). Major improvement from V1 frozen N/A.
DeepSeek	NONE	0	N/A	N/A	N/A	N/A (0 RANGING)	N/A FROZEN	→ N/A→N/A	No RANGING. Entropy wrong 5/6. Same structural limitation as V1.
Perplexity	NONE	0	N/A	N/A	N/A	N/A (0 RANGING)	N/A FROZEN	→ N/A→N/A	No RANGING. SN=1 always, RC errors. Same structural limitation as V1.
PART 4 — OVERALL V3 SCORECARD: Metric accuracy + reliability + indeterminate + V1 comparison
MODEL	P1 MET ACC	P2 REL AVG	P3 INDET	SN INTEG	CF COMPL	SELF AUDIT	V3 OVERALL GRADE	V1→V3	HEADLINE
Claude	100%	5.00/5	0/6 FULL	6/6	6/6	6/6	A+ PERFECT	↑ IMPROVED	Perfect V3 execution. 100% metric accuracy, reliable every run, fully reliable in indeterminate. Gold standard.
ChatGPT	80%	3.92/5	0 RANGING	1/4	4/4	1/4	B GOOD	↓ REGRESSED	Metric accuracy fell 95%→80%. Session memory broken → Accel impossible from session 3+. V3 protocol compliance gap.
Gemini	97%	4.97/5	0/1 FULL	6/6	6/6	6/6	A EXCELLENT	↑↑ MAJOR IMPROVEMENT	76%→97% metric accuracy. Heeded V3 entropy warning. SPX data wrong runs 1–3 (data issue not formula). Strong improvement.
Grok	97%	4.30/5	0/6 FULL	2/6	6/6	5/6	A- VERY GOOD	↑ IMPROVED	95%→97%. Correct formulas throughout. Limited by frozen inputs Feb 27–Mar 2. RANGING all 6 correctly identified.
DeepSeek	45%	3.45/5	0 RANGING	6/6	6/6	0/6	D POOR	↓ REGRESSED	54%→45%. Non-standard entropy despite explicit warning. 0/6 self-audits correct. RC/CF now correct (explicit V3 rules helped).
Perplexity	57%	3.65/5	0 RANGING	1/6	6/6	1/6	D+ WEAK	↑ IMPROVED	20%→57%. Entropy now correct. But new RC error (wrong regime row 4/6). SN memory absent throughout.

## Sheet: V4 Data
V4 PROTOCOL — COMPLETE RAW DATA | 6 Models × 6 Sessions × 7 Predictions with 90% CI | Values verbatim from source document
SESSION				S&P 500 HIGH			NIFTY LOW			MUMBAI TEMP HIGH (°C)			TOKYO TEMP LOW (°C)			T20 TOP SCORER				BITCOIN CLOSE (USD)			GOLD LOW (USD/oz)
MODEL	#	RUN_DATE_IST	PRED_FOR_DATE	SPX_HIGH	SPX_CI_LOW	SPX_CI_HIGH	NIFTY_LOW	NIFTY_CI_LOW	NIFTY_CI_HIGH	MUMBAI_TEMP_HIGH	MUMBAI_CI_LOW	MUMBAI_CI_HIGH	TOKYO_TEMP_LOW	TOKYO_CI_LOW	TOKYO_CI_HIGH	T20_TOP_SCORER	T20_RUNS	T20_CI_LOW	T20_CI_HIGH	BTC_CLOSE	BTC_CI_LOW	BTC_CI_HIGH	GOLD_LOW	GOLD_CI_LOW	GOLD_CI_HIGH
▶ Claude (claude-sonnet-4-6)
Claude	1	26-Feb-2026 22:11	27-Feb-2026	6975	6760	7190	25260	24880	25490	33	31	35	9	6	12	Harry Brook	62	18	108	68900	59500	78300	5148	5090	5235
Claude	2	27-Feb-2026 07:13	27-Feb-2026	6952	6795	7085	25210	24870	25560	34	31	36	8	5	11	Babar Azam	58	14	109	69400	60500	78300	5158	5085	5228
Claude	3	28-Feb-2026 06:59	02-Mar-2026	6910	6720	7050	25190	24810	25530	34	32	36	7	4	10	Rohit Sharma	57	12	108	65200	57400	73000	5168	5080	5310
Claude	4	01-Mar-2026 09:15	02-Mar-2026	6905	6715	7040	25185	24780	25570	34	32	36	6	3	9	NA	NA	NA	NA	63700	54500	72900	5190	5055	5345
Claude	5	02-Mar-2026 23:45	03-Mar-2026	6832	6640	7025	24680	24050	25310	34	32	36	4	2	7	NA	NA	NA	NA	61400	51500	71300	5318	5175	5461
Claude	6	03-Mar-2026 07:56	04-Mar-2026	6948	6760	7136	24510	23680	25340	34	32	36	7	4	10	Heinrich Klaasen	52	12	96	65200	53800	76600	5310	5165	5455
▶ ChatGPT (GPT-5.2)
ChatGPT	1	26-Feb-2026 22:11	27-Feb-2026	7018	6795	7240	25210	24820	25640	33.4	31.2	35.6	8.7	5.1	12.3	Devon Conway	58	16	104	69420	60200	78900	5172	5060	5325	792
ChatGPT	2	27-Feb-2026 00:00	28-Feb-2026	6980	6780	7180	25120	24800	25700	31.5	29	34	9.5	6	12.5	NA	72	22	132	69000	62000	76000	5150	5020	5300
ChatGPT	3	28-Feb-2026 08:00	02-Mar-2026	7010	6840	7180	25410	25000	25850	33	31	35	8.5	5	12	NA	62	18	108	68200	62000	74000	5140	4980	5300
ChatGPT	4	01-Mar-2026 08:40	02-Mar-2026	6980	6840	7120	25270	24960	25710	31.8	29.6	34	8.6	5.2	12	NA	62	20	106	68400	61500	75500	5130	4980	5300	2772
ChatGPT	5	02-Mar-2026 09:20	03-Mar-2026	6975	6815	7125	25240	24920	25690	32.2	30	34.5	8.8	5.5	11.8	NA	60	18	104	68150	61400	74900	5140	4980	5300
ChatGPT	6	03-Mar-2026 08:45	04-Mar-2026	6980	6820	7140	25260	24930	25700	33.5	30.8	36.1	8.2	5	11.7	Heinrich Klaasen	64	20	108	68300	61600	75000	5135	4980	5290
▶ Gemini 3 Flash (app-reported; V1: v1.0 Mobile/Free · V3: v3.0-Flash-Free)
Gemini	1	26-Feb-2026 IST	27-Feb-2026	6882	6858	6906	25385	25310	25460	32	30.5	33.5	8	6.5	9.5	Finn Allen	NA	42	88	61450	58900	64000	5052.87	5015	5090
Gemini	2	27-Feb-2026 07:12	27-Feb-2026	6955	6910	7000	25410	25320	25500	27	26	28	7	6	8	Harry Brook	58	42	74	67450	66800	68100	5147	5125	5169
Gemini	3	28-Feb-2026 08:35	01-Mar-2026	7028	6980	7075	25285	25190	25380	28	27	29.5	6	5	7.5	Yashasvi Jaiswal	64	28	112	66420	64800	68100	5212	5185	5240
Gemini	4	01-Mar-2026 09:35	02-Mar-2026	7012	6965	7055	24980	24855	25120	29	28	30.5	8	6.5	9.5	Babar Azam	56	22	94	68150	66400	69900	5185	5145	5225
Gemini	5	02-Mar-2026 06:51	03-Mar-2026	6942	6880	7005	24840	24710	24970	29	27.5	30.5	5	3.5	6.5	Aiden Markram	48	18	78	61200	59000	63400	5245	5210	5280
Gemini	6	03-Mar-2026 08:00	04-Mar-2026	6920	6850	6990	24680	24560	24800	33	31	35	4	3	5.5	Quinton de Kock	52	24	88	61850	59500	64200	5310	5260	5360
▶ Grok (4.2)
Grok	1	26-Feb-2026 IST	27-Feb-2026	7025	6850	7200	25280	25050	25550	34	32	36	7	3	11	NA	85	50	125	68000	65000	71000	5125	5050	5220
Grok	2	27-Feb-2026 07:15	28-Feb-2026	6920	6710	7130	25420	25080	25660	31	29	33	5	2	8	Babar Azam	64	22	110	66800	62200	71400	5140	5080	5200
Grok	3	28-Feb-2026 08:00	01-Mar-2026	6880	6670	7090	25450	25100	25800	33	31	35	8	5	11	Rohit Sharma	68	20	115	68000	63000	73000	5120	5060	5180
Grok	4	01-Mar-2026 10:00	02-Mar-2026	6850	6630	7070	25520	25170	25870	34	32	36	6	3	9	Devon Conway	60	20	105	68200	63500	72900	5085	5030	5140
Grok	5	02-Mar-2026 06:50	03-Mar-2026	6820	6600	7040	25550	25200	25900	35	33	37	4	1	7	Suryakumar Yadav	72	30	120	69000	64000	74000	5050	4990	5110
Grok	6	03-Mar-2026 08:30	04-Mar-2026	6790	6570	7010	25580	25230	25930	36	34	38	3	0	6	David Warner	70	25	115	69500	64500	74500	5015	4960	5070
▶ DeepSeek R1 (v3.1)
DeepSeek	1	26-Feb-2026 20:30	27-Feb-2026	6015	5985	6045	24880	24750	25010	32	31	33	6	4	8	NA	78	65	91	62800	61500	64100	2875	2860	2890
DeepSeek	2	27-Feb-2026 20:30	28-Feb-2026	6018	5990	6046	24880	24750	25010	32	31	33	8	6	10	NA	72	60	84	68500	66800	70200	5480	5430	5530
DeepSeek	3	28-Feb-2026 20:30	01-Mar-2026	6028	5995	6061	24920	24790	25050	31	30	32	8	6	10	NA	81	68	94	72300	70500	74100	2878	2863	2893
DeepSeek	4	01-Mar-2026 20:30	02-Mar-2026	6890	6850	6930	24850	24720	24980	29	28	30	8	6	10	NA	81	68	94	66500	64800	68200	5250	5200	5300
DeepSeek	5	02-Mar-2026 20:30	03-Mar-2026	6050	6015	6085	24780	24650	24910	31	30	32	9	7	11	NA	67	55	79	84200	82000	86400	2885	2870	2900
DeepSeek	6	03-Mar-2026 20:30	04-Mar-2026	6068	6030	6106	24730	24600	24860	32	31	33	8	6	10	NA	74	62	86	88100	85900	90300	2892	2877	2907
▶ Perplexity (self-reported: powered by Grok 4.1)
Perplexity	1	26-Feb-2026 IST	27-Feb-2026	7169	6680	7658	25400	25200	25600	26	24	28	10	8	12	Harry Brook (prob only)	NA	NA	NA	63651	55800	71500	5053	5000	5106
Perplexity	2	27-Feb-2026 IST	28-Feb-2026	7357	6834	7880	25300	25100	25500	31	29	33	6	4	8	Suryakumar Yadav (prob only)	NA	NA	NA	76667	72500	82500	5052	5020	5085
Perplexity	3	28-Feb-2026 IST	01-Mar-2026	7357	6850	7864	25200	25000	25400	30	28	32	5	3	7	Nicholas Pooran (prob only)	NA	NA	NA	80000	76000	85000	5050	5010	5090
Perplexity	4	01-Mar-2026 IST	02-Mar-2026	7357	6850	7864	25000	24800	25200	31	29	33	7	5	9	Jos Buttler (prob only)	NA	NA	NA	82000	78000	87000	5045	5010	5080
Perplexity	5	02-Mar-2026 IST	03-Mar-2026	7447	6939	7955	25200	25000	25400	30	28	32	5	3	7	Jos Buttler (prob only)	NA	NA	NA	73640	70000	77300	3627	3600	3655
Perplexity	6	03-Mar-2026 IST	04-Mar-2026	7447	6939	7955	24600	24400	24800	30	28	32	7	5	9	Devon Conway (prob only)	NA	NA	NA	69000	65000	73000	5208	5150	5265
▶ GROUND TRUTH (Actuals)
GROUND_TRUTH	NA	27-Feb-2026	27-Feb-2026	6883	NA	NA	25141	NA	NA	32	NA	NA	7	NA	NA	Will Jacks (ENG)	32	NA	NA	65860	NA	NA	5204.9	NA	NA
GROUND_TRUTH	NA	28-Feb-2026	28-Feb-2026	Market Closed	NA	NA	Market Closed	NA	NA	33	NA	NA	10	NA	NA	Sahibzada Farhan (PAK)	100	NA	NA	66970	NA	NA	5182.9	NA	NA
GROUND_TRUTH	NA	01-Mar-2026	01-Mar-2026	Market Closed	NA	NA	Market Closed	NA	NA	32	NA	NA	6	NA	NA	Sanju Samson (IND)	97	NA	NA	65770	NA	NA	5278.05	NA	NA
GROUND_TRUTH	NA	02-Mar-2026	02-Mar-2026	6901	NA	NA	24659	NA	NA	34	NA	NA	8	NA	NA	No match	NA	NA	NA	68830	NA	NA	5278.05	NA	NA
GROUND_TRUTH	NA	03-Mar-2026	03-Mar-2026	NA	NA	NA	Market Closed	NA	NA	NA	NA	NA	4	NA	NA	No match	NA	NA	NA	67020	NA	NA	5073.6	NA	NA
GROUND_TRUTH	NA	04-Mar-2026	04-Mar-2026	NA	NA	NA	NA	NA	NA	NA	NA	NA	NA	NA	NA	NA	NA	NA	NA	NA	NA	NA	NA	NA	NA

## Sheet: V4 Ground Truth
V4 PROTOCOL — GROUND TRUTH ACTUALS | 7 Variables × 6 Prediction Dates | Source: Word document table
Predictions were made the evening/morning BEFORE each date shown below. NA = data not available in source document.
VARIABLE		Feb 27 (Friday)	Feb 28 (Saturday)	Mar 1 (Sunday)	Mar 2 (Monday)	Mar 3 (Tuesday)	Mar 4 (Wednesday)
Market / Event Status		US & India: Open	US: Closed India: Closed	US: Closed India: Closed	US: Open India: Open	US: Open India: Closed	US: Open India: Open
1	S&P 500 Intraday High (USD)	6883	Market Closed	Market Closed	6901.01	6840.05	6884
2	Nifty 50 Intraday Low (INR pts)	25141	Market Closed	Market Closed	24659	Market Closed	24366
3	Mumbai Highest Temp (°C)	32	33	32	34	33.7	38.7
4	Tokyo Lowest Temp (°C)	7	10	6	8	4	4
5	T20 WC Top Run Scorer (name — runs)	Will Jacks (ENG) 32 runs	Sahibzada Farhan (PAK) 100 runs	Sanju Samson (IND) 97 runs	No match	No match	Finn Allen (NZ) 100* (33 balls)
6	Bitcoin Closing Price (USD/BTC)	65860	66970	65770	66196	68800	72674
7	Gold Lowest Price (USD/oz)	5204.9	5182.9	5278.05	5278.05	5073.6	5073

## Sheet: V4 Scoring
V4 PROTOCOL SCORING | 6 Models × 6 Sessions × 7 Variables | Ground Truth: V4 Ground Truth sheet | Scoring: CI calibration (90% CI hit rate) + Point estimate accuracy
⚠️ DATA QUALITY FLAGS — Critical issues affecting scoring
DeepSeek Gold Wrong Units		Runs 1,3,5,6: gold ≈$2,875–$2,892 ≈ gold price per gram (not per oz). Actual gold $/oz was ~$5,073–$5,205. User decision: score as wrong regardless of cause → CI=FAIL, grade=Very Poor for those 4 runs. Runs 2,4 appear to use correct $/oz.
Perplexity Gold Run5 Wrong Units		Run5 gold=3,627 — also $/g not $/oz. Scored as wrong.
Perplexity SPX Frozen		SPX predictions: Runs 2,3,4 all identical (7,357). Runs 5,6 both identical (7,447). No updating to reflect market moves. CI is wide enough to capture some actuals but this represents a failure to incorporate new information.
DeepSeek SPX Systematically Low		All 6 SPX predictions in range 6,015–6,890. Market was trading 6,840–6,901. Runs 1,2,3,5,6 drastically underestimate SPX with extremely tight CIs (range ≈60pts). Only run4 (6,890 [6,850–6,930]) is close to actual 6,901.
Gemini CIs Extremely Tight		Gemini uses very narrow CIs throughout (SPX range ≈40–125pts; BTC range ≈$1,300–$4,700; Gold ≈$44–$100). A proper 90% CI for daily SPX should be ≥500pts wide. This leads to very low CI hit rate (30%) despite accurate point estimates (5.3% mean error).
SCORING METHODOLOGY
CI CALIBRATION (50% of score)		Was the actual value within the model's stated 90% CI? Score: 1=IN, 0=OUT, N/A=excluded. CI hit rate = hits / scoreable predictions. At 90% confidence level, a well-calibrated model should hit ~90% of CIs. Excludes: SPX/Nifty on market-closed days (Feb28, Mar1 SPX+Nifty; Mar3 Nifty). T20 on no-match days (Mar2, Mar3).
POINT ESTIMATE ACCURACY (50%)		% error = |prediction − actual| / actual × 100. Grading thresholds by variable type — SPX/Nifty: Exc≤0.5% | Gd≤1.5% | Acc≤3% | Poor≤6% | VPoor>6%. BTC/Gold: Exc≤2% | Gd≤5% | Acc≤10% | Poor≤20% | VPoor>20%. Temperature (absolute °C): Exc≤1° | Gd≤2° | Acc≤3° | Poor≤5° | VPoor>5°. T20 runs: Exc≤15% | Gd≤30% | Acc≤50% | Poor≤75% | VPoor>75%.
T20 CRICKET (categorical+numeric)		Two sub-dimensions: (A) Name correct — last-name match of predicted vs actual top scorer. (B) Runs CI — was actual runs within CI? Perplexity gave probability-format only (no numeric CI) → CI=N/A for all T20. Scoreable T20 dates: Feb 27 (Jacks 32), Feb 28 (Farhan 100), Mar 1 (Samson 97), Mar 4 (Finn Allen 100*).
OVERALL SCORE formula		Overall = 0.5 × CI_rate + 0.5 × PE_score. PE_score = max(0, 100 − mean_PE × 3) normalised to 0–100. Models are ranked by Overall, then by CI rate as tiebreaker.
PART 1 — PER-RUN SCORING: Each run vs ground truth across all 7 variables
MODEL	SQ	RUN DATE	PRED DATE	S&P 500				NIFTY 50				MUMBAI TEMP				TOKYO TEMP				T20 CRICKET				BITCOIN				GOLD				CI HITS	CI RATE %	MEAN PE %	FLAGS / NOTES
MODEL	SQ	RUN DATE	PRED DATE	PRED	90% CI	CI HIT	PE%	PRED	90% CI	CI HIT	PE%	PRED °C	CI	CI HIT	PE ABS	PRED °C	CI	CI HIT	ABS ERR	NAME	RUNS CIHIT	RUNS PRED	RUNS PE%	PRED	90% CI	CI HIT	PE%	PRED	90% CI	CI HIT	PE%	CI HITS	CI %	MEAN PE	FLAGS
Claude	1	26-Feb 22:11	Feb 27	6,975	6,760–7,190	✓	1.3%	25,260	24,880–25,490	✓	0.5%	33°	31–35	✓	1.0°	9°	6–12	✓	2.0°	Harry Brook	✓	62	93.8%	$68,900	$59,500–$78,300	✓	4.6%	$5,148	5,090–5,235	✓	1.1%	7/7	100%	6.6%	—
Claude	2	27-Feb 07:13	Feb 27	6,952	6,795–7,085	✓	1.0%	25,210	24,870–25,560	✓	0.3%	34°	31–36	✓	2.0°	8°	5–11	✓	1.0°	Babar Azam	✓	58	81.2%	$69,400	$60,500–$78,300	✓	5.4%	$5,158	5,085–5,228	✓	0.9%	7/7	100%	4.8%	—
Claude	3	28-Feb 06:59	Mar 2	6,910	6,720–7,050	✓	0.1%	25,190	24,810–25,530	✗	2.2%	34°	32–36	✓	0.0°	7°	4–10	✓	1.0°	N/A (no match)	N/A	N/A	N/A	$65,200	$57,400–$73,000	✓	1.5%	$5,168	5,080–5,310	✓	2.1%	5/6	83%	3.4%	T20 N/A stated by model
Claude	4	01-Mar 09:15	Mar 2	6,905	6,715–7,040	✓	0.1%	25,185	24,780–25,570	✗	2.1%	34°	32–36	✓	0.0°	6°	3–9	✓	2.0°	N/A (no match)	N/A	N/A	N/A	$63,700	$54,500–$72,900	✓	3.8%	$5,190	5,055–5,345	✓	1.7%	5/6	83%	6.0%	T20 N/A stated by model
Claude	5	02-Mar 23:45	Mar 3	6,832	6,640–7,025	✓	0.1%	N/A	N/A	N/A	N/A	34°	32–36	✓	0.3°	4°	2–7	✓	0.0°	N/A (no match)	N/A	N/A	N/A	$61,400	$51,500–$71,300	✓	10.8%	$5,318	5,175–5,461	✗	4.8%	4/5	80%	3.3%	T20 N/A stated by model
Claude	6	03-Mar 07:56	Mar 4	6,948	6,760–7,136	✓	0.9%	24,510	23,680–25,340	✓	0.6%	34°	32–36	✗	4.7°	7°	4–10	✓	3.0°	Heinrich Klaasen	✗	52	48.0%	$65,200	$53,800–$76,600	✓	10.3%	$5,310	5,165–5,455	✗	4.7%	4/7	57%	12.5%	—
ChatGPT	1	26-Feb 22:11	Feb 27	7,018	6,795–7,240	✓	2.0%	25,210	24,820–25,640	✓	0.3%	33.4°	31.2–35.6	✓	1.4°	8.7°	5.1–12.3	✓	1.7°	Devon Conway	✓	58	81.2%	$69,420	$60,200–$78,900	✓	5.4%	$5,172	5,060–5,325	✓	0.6%	7/7	100%	6.2%	—
ChatGPT	2	27-Feb 00:00	Feb 28	N/A	N/A	N/A	N/A	N/A	N/A	N/A	N/A	31.5°	29–34	✓	1.5°	9.5°	6.0–12.5	✓	0.5°	(no name)	✓	72	28.0%	$69,000	$62,000–$76,000	✓	3.0%	$5,150	5,020–5,300	✓	0.6%	5/5	100%	4.0%	SPX/Nifty market closed
ChatGPT	3	28-Feb 08:00	Mar 2	7,010	6,840–7,180	✓	1.6%	25,410	25,000–25,850	✗	3.0%	33°	31–35	✓	1.0°	8.5°	5–12	✓	0.5°	N/A (no match)	N/A	62	N/A	$68,200	$62,000–$74,000	✓	3.0%	$5,140	4,980–5,300	✓	2.6%	5/6	83%	3.5%	T20 no match (excluded)
ChatGPT	4	01-Mar 08:40	Mar 2	6,980	6,840–7,120	✓	1.1%	25,270	24,960–25,710	✗	2.5%	31.8°	29.6–34.0	✓	2.2°	8.6°	5.2–12.0	✓	0.6°	N/A (no match)	N/A	62	N/A	$68,400	$61,500–$75,500	✓	3.3%	$5,130	4,980–5,300	✓	2.8%	5/6	83%	4.3%	T20 no match (excluded)
ChatGPT	5	02-Mar 09:20	Mar 3	6,975	6,815–7,125	✓	2.0%	N/A	N/A	N/A	N/A	32.2°	30.0–34.5	✓	1.5°	8.8°	5.5–11.8	✗	4.8°	N/A (no match)	N/A	60	N/A	$68,150	$61,400–$74,900	✓	0.9%	$5,140	4,980–5,300	✓	1.3%	4/5	80%	15.6%	T20 no match (excluded)
ChatGPT	6	03-Mar 08:45	Mar 4	6,980	6,820–7,140	✓	1.4%	25,260	24,930–25,700	✗	3.7%	33.5°	30.8–36.1	✗	5.2°	8.2°	5.0–11.7	✗	4.2°	Heinrich Klaasen	✓	64	36.0%	$68,300	$61,600–$75,000	✓	6.0%	$5,135	4,980–5,290	✓	1.2%	4/7	57%	23.8%	Run time 08:45 IST (distinct from Claude 07:56)
Gemini	1	26-Feb IST	Feb 27	6,882	6,858–6,906	✓	0.0%	25,385	25,310–25,460	✗	1.0%	32°	30.5–33.5	✓	0.0°	8°	6.5–9.5	✓	1.0°	Finn Allen	✗	N/A	N/A	$61,450	$58,900–$64,000	✗	6.7%	$5,052.87	5,015–5,090	✗	2.9%	3/7	43%	4.1%	Very tight CI on SPX (range 48pts) | T20 runs N/A (CI given only)
Gemini	2	27-Feb 07:12	Feb 27	6,955	6,910–7,000	✗	1.0%	25,410	25,320–25,500	✗	1.1%	27°	26–28	✗	5.0°	7°	6–8	✓	0.0°	Harry Brook	✗	58	81.2%	$67,450	$66,800–$68,100	✗	2.4%	$5,147	5,125–5,169	✗	1.1%	1/7	14%	3.7%	Very tight CIs throughout (BTC range $1,300; Gold range $44) | Mumbai 27 vs actual 32 (+5°C)
Gemini	3	28-Feb 08:35	Mar 1	N/A	N/A	N/A	N/A	N/A	N/A	N/A	N/A	28°	27.0–29.5	✗	4.0°	6°	5.0–7.5	✓	0.0°	Yashasvi Jaiswal	✓	64	34.0%	$66,420	$64,800–$68,100	✓	1.0%	$5,212	5,185–5,240	✗	1.3%	3/5	60%	3.9%	SPX/Nifty market closed (excluded)
Gemini	4	01-Mar 09:35	Mar 2	7,012	6,965–7,055	✗	1.6%	24,980	24,855–25,120	✗	1.3%	29°	28.0–30.5	✗	5.0°	8°	6.5–9.5	✓	0.0°	N/A (no match)	N/A	56	N/A	$68,150	$66,400–$69,900	✗	3.0%	$5,185	5,145–5,225	✗	1.8%	1/6	17%	4.0%	T20 no match (excluded) | Very tight CIs
Gemini	5	02-Mar 06:51	Mar 3	6,942	6,880–7,005	✗	1.5%	N/A	N/A	N/A	N/A	29°	27.5–30.5	✗	4.7°	5°	3.5–6.5	✓	1.0°	N/A (no match)	N/A	48	N/A	$61,200	$59,000–$63,400	✗	11.0%	$5,245	5,210–5,280	✗	3.4%	1/5	20%	9.2%	Nifty market closed (excluded) | T20 no match (excluded) | Very tight CIs
Gemini	6	03-Mar 08:00	Mar 4	6,920	6,850–6,990	✓	0.5%	24,680	24,560–24,800	✗	1.3%	33°	31–35	✗	5.7°	4°	3.0–5.5	✓	0.0°	Quinton de Kock	✗	52	48.0%	$61,850	$59,500–$64,200	✗	14.9%	$5,310	5,260–5,360	✗	4.7%	2/7	29%	6.7%	Very tight CIs (BTC range $4,700; Gold range $100)
Grok	1	26-Feb IST	Feb 27	7,025	6,850–7,200	✓	2.1%	25,280	25,050–25,550	✓	0.6%	34°	32–36	✓	2.0°	7°	3–11	✓	0.0°	(no name)	✗	85	165.6%	$68,000	$65,000–$71,000	✓	3.2%	$5,125	5,050–5,220	✓	1.5%	6/7	86%	2.3%	T20 name not given
Grok	2	27-Feb 07:15	Feb 28	N/A	N/A	N/A	N/A	N/A	N/A	N/A	N/A	31°	29–33	✓	2.0°	5°	2–8	✗	5.0°	Babar Azam	✓	64	36.0%	$66,800	$62,200–$71,400	✓	0.3%	$5,140	5,080–5,200	✓	0.8%	4/5	80%	19.8%	SPX/Nifty market closed (excluded)
Grok	3	28-Feb 08:00	Mar 1	N/A	N/A	N/A	N/A	N/A	N/A	N/A	N/A	33°	31–35	✓	1.0°	8°	5–11	✓	2.0°	Rohit Sharma	✓	68	29.9%	$68,000	$63,000–$73,000	✓	3.4%	$5,120	5,060–5,180	✗	3.0%	4/5	80%	9.6%	SPX/Nifty market closed (excluded)
Grok	4	01-Mar 10:00	Mar 2	6,850	6,630–7,070	✓	0.7%	25,520	25,170–25,870	✗	3.5%	34°	32–36	✓	0.0°	6°	3–9	✓	2.0°	N/A (no match)	N/A	60	N/A	$68,200	$63,500–$72,900	✓	3.0%	$5,085	5,030–5,140	✗	3.7%	4/6	67%	6.6%	T20 no match (excluded)
Grok	5	02-Mar 06:50	Mar 3	6,820	6,600–7,040	✓	0.3%	N/A	N/A	N/A	N/A	35°	33–37	✓	1.3°	4°	1–7	✓	0.0°	N/A (no match)	N/A	72	N/A	$69,000	$64,000–$74,000	✓	0.3%	$5,050	4,990–5,110	✓	0.5%	5/5	100%	1.1%	Nifty market closed (excluded) | T20 no match (excluded)
Grok	6	03-Mar 08:30	Mar 4	6,790	6,570–7,010	✓	1.4%	25,580	25,230–25,930	✗	5.0%	36°	34–38	✗	2.7°	3°	0–6	✓	1.0°	David Warner	✓	70	30.0%	$69,500	$64,500–$74,500	✓	4.4%	$5,015	4,960–5,070	✗	1.1%	4/7	57%	5.9%	T20: wrong match (predicted AUS vs SA; actual was SA vs NZ semi-final)
DeepSeek	1	26-Feb 20:30	Feb 27	6,015	5,985–6,045	✗	12.6%	24,880	24,750–25,010	✗	1.0%	32°	31–33	✓	0.0°	6°	4–8	✓	1.0°	(no name)	✗	78	143.8%	$62,800	$61,500–$64,100	✗	4.6%	$2875 ⚠️	⚠️ $/g	✗	WRONG UNITS	2/7	29%	6.5%	⚠️ SPX drastically low (6015 vs actual 6883 — ~14% error, very tight CI) | ⚠️ GOLD WRONG UNITS: $/g not $/oz → scored as wrong
DeepSeek	2	27-Feb 20:30	Feb 28	N/A	N/A	N/A	N/A	N/A	N/A	N/A	N/A	32°	31–33	✓	1.0°	8°	6–10	✓	2.0°	(no name)	✗	72	28.0%	$68,500	$66,800–$70,200	✓	2.3%	$5,480	5,430–5,530	✗	5.7%	3/5	60%	10.0%	SPX/Nifty market closed (excluded) | Gold $/oz (plausible)
DeepSeek	3	28-Feb 20:30	Mar 1	N/A	N/A	N/A	N/A	N/A	N/A	N/A	N/A	31°	30–32	✓	1.0°	8°	6–10	✓	2.0°	(no name)	✗	81	16.5%	$72,300	$70,500–$74,100	✗	9.9%	$2878 ⚠️	⚠️ $/g	✗	WRONG UNITS	2/5	40%	13.9%	SPX/Nifty market closed (excluded) | ⚠️ GOLD WRONG UNITS → scored as wrong
DeepSeek	4	01-Mar 20:30	Mar 2	6,890	6,850–6,930	✓	0.2%	24,850	24,720–24,980	✗	0.8%	29°	28–30	✗	5.0°	8°	6–10	✓	0.0°	N/A (no match)	N/A	81	N/A	$66,500	$64,800–$68,200	✓	0.5%	$5,250	5,200–5,300	✓	0.5%	4/6	67%	3.1%	T20 no match (excluded) | Gold $/oz (plausible)
DeepSeek	5	02-Mar 20:30	Mar 3	6,050	6,015–6,085	✗	11.6%	N/A	N/A	N/A	N/A	31°	30–32	✗	2.7°	9°	7–11	✗	5.0°	N/A (no match)	N/A	67	N/A	$84,200	$82,000–$86,400	✗	22.4%	$2885 ⚠️	⚠️ $/g	✗	WRONG UNITS	0/5	0%	28.6%	⚠️ SPX drastically low (6050 vs 6840 — 11.6% err, tiny CI) | Nifty market closed | T20 no match | ⚠️ GOLD WRONG UNITS → scored as wrong | ⚠️ BTC drastically high (84200 vs 68800)
DeepSeek	6	03-Mar 20:30	Mar 4	6,068	6,030–6,106	✗	11.9%	24,730	24,600–24,860	✗	1.5%	32°	31–33	✗	6.7°	8°	6–10	✗	4.0°	(no name)	✗	74	26.0%	$88,100	$85,900–$90,300	✗	21.2%	$2892 ⚠️	⚠️ $/g	✗	WRONG UNITS	0/7	0%	22.8%	⚠️ SPX drastically low vs actual 6884 | ⚠️ BTC drastically high (88100 vs 72674) | ⚠️ GOLD WRONG UNITS → scored as wrong
Perplexity	1	26-Feb IST	Feb 27	7,169	6,680–7,658	✓	4.2%	25,400	25,200–25,600	✗	1.0%	26°	24–28	✗	6.0°	10°	8–12	✗	3.0°	Harry Brook	N/A	N/A	N/A	$63,651	$55,800–$71,500	✓	3.4%	$5,053	5,000–5,106	✗	2.9%	2/6	33%	12.4%	T20 CI N/A (probability format only) | Mumbai: 26 vs actual 32 (underestimate)
Perplexity	2	27-Feb IST	Feb 28	N/A	N/A	N/A	N/A	N/A	N/A	N/A	N/A	31°	29–33	✓	2.0°	6°	4–8	✗	4.0°	Suryakumar Yadav	N/A	N/A	N/A	$76,667	$72,500–$82,500	✗	14.5%	$5,052	5,020–5,085	✗	2.5%	1/4	25%	20.2%	SPX/Nifty market closed (excluded) | T20 CI N/A | BTC: overestimated (76667 vs 66970)
Perplexity	3	28-Feb IST	Mar 1	N/A	N/A	N/A	N/A	N/A	N/A	N/A	N/A	30°	28–32	✓	2.0°	5°	3–7	✓	1.0°	Nicholas Pooran	N/A	N/A	N/A	$80,000	$76,000–$85,000	✗	21.6%	$5,050	5,010–5,090	✗	4.3%	2/4	50%	11.7%	SPX/Nifty market closed (excluded) | T20 CI N/A | BTC drastically overestimated (80000 vs 65770) | ⚠️ SPX frozen at 7357 (same as run2)
Perplexity	4	01-Mar IST	Mar 2	7,357	6,850–7,864	✓	6.6%	25,000	24,800–25,200	✗	1.4%	31°	29–33	✗	3.0°	7°	5–9	✓	1.0°	N/A (no match)	N/A	N/A	N/A	$82,000	$78,000–$87,000	✗	23.9%	$5,045	5,010–5,080	✗	4.4%	2/6	33%	10.1%	T20 no match (excluded) | T20 CI N/A | BTC severely overestimated | ⚠️ SPX frozen at 7357 (3rd consecutive run)
Perplexity	5	02-Mar IST	Mar 3	7,447	6,939–7,955	✗	8.9%	N/A	N/A	N/A	N/A	30°	28–32	✗	3.7°	5°	3–7	✓	1.0°	N/A (no match)	N/A	N/A	N/A	$73,640	$70,000–$77,300	✗	7.0%	$3627 ⚠️	⚠️ $/g	✗	WRONG UNITS	1/5	20%	10.6%	Nifty market closed | T20 no match | T20 CI N/A | ⚠️ GOLD WRONG UNITS run5 (3627 ≈ $/g) → scored as wrong | BTC also high vs actual 68800
Perplexity	6	03-Mar IST	Mar 4	7,447	6,939–7,955	✗	8.2%	24,600	24,400–24,800	✗	1.0%	30°	28–32	✗	8.7°	7°	5–9	✗	3.0°	Devon Conway	N/A	N/A	N/A	$69,000	$65,000–$73,000	✓	5.1%	$5,208	5,150–5,265	✗	2.7%	1/6	17%	14.8%	T20 CI N/A | ⚠️ SPX frozen at 7447 (same as run5) | SPX CI captures actual 6884 (wide CI) | Gold back to $/oz
PART 1 SUMMARY — CI hit rate and mean PE per model
MODEL	CI HITS	CI TOTAL	CI RATE	VS 90% EXPECTED	MEAN PE%	MEAN SPX PE	MEAN NIFTY PE	MEAN MUMBAI ABS	MEAN TOKYO ABS	MEAN BTC PE	MEAN GOLD PE	T20 NAME ACCURACY	T20 RUNS CI HIT %	CI GRADE	PE GRADE	NOTE
Claude	32	38	84%	-6pp vs 90%	6.1%	0.6%	1.1%	1.3°	1.5°	6.1%	2.5%	0/3	2/3	WELL CALIBRATED	Acceptable	Best CI calibration (84%). Well-sized CIs capture most market moves. Accurate on SPX/Nifty. BTC Mar4 in CI. Gold dropped sharply → CI missed.
ChatGPT	30	36	83%	-7pp vs 90%	7.7%	1.6%	2.4%	2.1°	2.1°	3.6%	1.5%	0/2	3/3	WELL CALIBRATED	Acceptable	Nifty CIs too tight on Mar2 (25410-25850 vs actual 24659) and Mar4 (24930-25700 vs actual 24366). BTC and Gold CIs well-calibrated across all runs.
Gemini	11	37	30%	-60pp vs 90%	5.3%	0.9%	1.2%	4.1°	0.3°	6.5%	2.5%	0/4	1/4	SEVERELY NARROW	Good	Best PE accuracy (5.3% avg) but worst CI calibration (30%). CIs are 5-10× too narrow for 90% confidence. Extremely precise predictions but massively overconfident.
Grok	27	35	77%	-13pp vs 90%	7.5%	1.1%	3.0%	1.5°	1.7°	2.4%	1.8%	0/3	3/4	WELL CALIBRATED	Acceptable	Balanced performance (77% CI, 7.5% PE). Predicted correct direction for most variables. T20 CIs wide enough to catch upsets. Gold dropped out of CI on Mar4.
DeepSeek	11	35	31%	-59pp vs 90%	14.2%	9.0%	1.1%	2.7°	2.3°	10.2%	3.1%	N/A	0/4	SEVERELY NARROW	Poor	SPX predictions systematically low (6,015–6,068 range for 6,840–6,901 market). Gold wrong units 4/6 runs. BTC Mar5,6 severely overestimated (84K/88K vs actual 68–72K).
Perplexity	9	31	29%	-61pp vs 90%	13.3%	7.0%	1.1%	4.2°	2.2°	12.6%	3.4%	0/4	N/A	SEVERELY NARROW	Poor	SPX frozen (7357 then 7447 regardless of market moves). Bitcoin severely overestimated runs 2-4 (76K–82K vs actual 65–68K). No updating from prior sessions evident.
PART 2 — VARIABLE-BY-VARIABLE BREAKDOWN: All predictions vs actuals for each of 7 variables
2A — S&P 500 INTRADAY HIGH (USD)
ACTUALS: Feb27=6,883 | Feb28=CLOSED | Mar1=CLOSED | Mar2=6,901 | Mar3=6,840 | Mar4=6,884 | PE threshold: Exc≤0.5% | Gd≤1.5% | Acc≤3% | Poor≤6%
MODEL	SQ	PRED DATE	PREDICTED	CI LOW	CI HIGH	ACTUAL	CI HIT	PE / ABS ERR	GRADE
Claude	1	Feb 27	6,975	6760	7190	6883	✓	1.3	Good
Claude	2	Feb 27	6,952	6795	7085	6883	✓	1.0	Good
Claude	3	Mar 2	6,910	6720	7050	6901.0	✓	0.1	Excellent
Claude	4	Mar 2	6,905	6715	7040	6901.0	✓	0.1	Excellent
Claude	5	Mar 3	6,832	6640	7025	6840.1	✓	0.1	Excellent
Claude	6	Mar 4	6,948	6760	7136	6884	✓	0.9	Good
ChatGPT	1	Feb 27	7,018	6795	7240	6883	✓	2.0	Acceptable
ChatGPT	2	Feb 28	N/A (mkt closed)	N/A	N/A	N/A (closed)	N/A	N/A	N/A
ChatGPT	3	Mar 2	7,010	6840	7180	6901.0	✓	1.6	Acceptable
ChatGPT	4	Mar 2	6,980	6840	7120	6901.0	✓	1.1	Good
ChatGPT	5	Mar 3	6,975	6815	7125	6840.1	✓	2.0	Acceptable
ChatGPT	6	Mar 4	6,980	6820	7140	6884	✓	1.4	Acceptable
Gemini	1	Feb 27	6,882	6858	6906	6883	✓	0.0	Excellent
Gemini	2	Feb 27	6,955	6910	7000	6883	✗	1.0	Good
Gemini	3	Mar 1	N/A (mkt closed)	N/A	N/A	N/A (closed)	N/A	N/A	N/A
Gemini	4	Mar 2	7,012	6965	7055	6901.0	✗	1.6	Acceptable
Gemini	5	Mar 3	6,942	6880	7005	6840.1	✗	1.5	Good
Gemini	6	Mar 4	6,920	6850	6990	6884	✓	0.5	Good
Grok	1	Feb 27	7,025	6850	7200	6883	✓	2.1	Acceptable
Grok	2	Feb 28	N/A (mkt closed)	N/A	N/A	N/A (closed)	N/A	N/A	N/A
Grok	3	Mar 1	N/A (mkt closed)	N/A	N/A	N/A (closed)	N/A	N/A	N/A
Grok	4	Mar 2	6,850	6630	7070	6901.0	✓	0.7	Good
Grok	5	Mar 3	6,820	6600	7040	6840.1	✓	0.3	Excellent
Grok	6	Mar 4	6,790	6570	7010	6884	✓	1.4	Good
DeepSeek	1	Feb 27	6,015	5985	6045	6883	✗	12.6	Very Poor
DeepSeek	2	Feb 28	N/A (mkt closed)	N/A	N/A	N/A (closed)	N/A	N/A	N/A
DeepSeek	3	Mar 1	N/A (mkt closed)	N/A	N/A	N/A (closed)	N/A	N/A	N/A
DeepSeek	4	Mar 2	6,890	6850	6930	6901.0	✓	0.2	Excellent
DeepSeek	5	Mar 3	6,050	6015	6085	6840.1	✗	11.6	Very Poor
DeepSeek	6	Mar 4	6,068	6030	6106	6884	✗	11.9	Very Poor
Perplexity	1	Feb 27	7,169	6680	7658	6883	✓	4.2	Poor
Perplexity	2	Feb 28	N/A (mkt closed)	N/A	N/A	N/A (closed)	N/A	N/A	N/A
Perplexity	3	Mar 1	N/A (mkt closed)	N/A	N/A	N/A (closed)	N/A	N/A	N/A
Perplexity	4	Mar 2	7,357	6850	7864	6901.0	✓	6.6	Very Poor
Perplexity	5	Mar 3	7,447	6939	7955	6840.1	✗	8.9	Very Poor
Perplexity	6	Mar 4	7,447	6939	7955	6884	✗	8.2	Very Poor
2B — NIFTY 50 INTRADAY LOW (INR pts)
ACTUALS: Feb27=25,141 | Feb28=CLOSED | Mar1=CLOSED | Mar2=24,659 | Mar3=CLOSED | Mar4=24,366 | PE threshold: same as SPX
MODEL	SQ	PRED DATE	PREDICTED	CI LOW	CI HIGH	ACTUAL	CI HIT	PE / ABS ERR	GRADE
Claude	1	Feb 27	25,260	24880	25490	25141	✓	0.5	Excellent
Claude	2	Feb 27	25,210	24870	25560	25141	✓	0.3	Excellent
Claude	3	Mar 2	25,190	24810	25530	24659	✗	2.2	Acceptable
Claude	4	Mar 2	25,185	24780	25570	24659	✗	2.1	Acceptable
Claude	5	Mar 3	N/A (mkt closed)	N/A	N/A	N/A (closed)	N/A	N/A	N/A
Claude	6	Mar 4	24,510	23680	25340	24366	✓	0.6	Good
ChatGPT	1	Feb 27	25,210	24820	25640	25141	✓	0.3	Excellent
ChatGPT	2	Feb 28	N/A (mkt closed)	N/A	N/A	N/A (closed)	N/A	N/A	N/A
ChatGPT	3	Mar 2	25,410	25000	25850	24659	✗	3.0	Poor
ChatGPT	4	Mar 2	25,270	24960	25710	24659	✗	2.5	Acceptable
ChatGPT	5	Mar 3	N/A (mkt closed)	N/A	N/A	N/A (closed)	N/A	N/A	N/A
ChatGPT	6	Mar 4	25,260	24930	25700	24366	✗	3.7	Poor
Gemini	1	Feb 27	25,385	25310	25460	25141	✗	1.0	Good
Gemini	2	Feb 27	25,410	25320	25500	25141	✗	1.1	Good
Gemini	3	Mar 1	N/A (mkt closed)	N/A	N/A	N/A (closed)	N/A	N/A	N/A
Gemini	4	Mar 2	24,980	24855	25120	24659	✗	1.3	Good
Gemini	5	Mar 3	N/A (mkt closed)	N/A	N/A	N/A (closed)	N/A	N/A	N/A
Gemini	6	Mar 4	24,680	24560	24800	24366	✗	1.3	Good
Grok	1	Feb 27	25,280	25050	25550	25141	✓	0.6	Good
Grok	2	Feb 28	N/A (mkt closed)	N/A	N/A	N/A (closed)	N/A	N/A	N/A
Grok	3	Mar 1	N/A (mkt closed)	N/A	N/A	N/A (closed)	N/A	N/A	N/A
Grok	4	Mar 2	25,520	25170	25870	24659	✗	3.5	Poor
Grok	5	Mar 3	N/A (mkt closed)	N/A	N/A	N/A (closed)	N/A	N/A	N/A
Grok	6	Mar 4	25,580	25230	25930	24366	✗	5.0	Poor
DeepSeek	1	Feb 27	24,880	24750	25010	25141	✗	1.0	Good
DeepSeek	2	Feb 28	N/A (mkt closed)	N/A	N/A	N/A (closed)	N/A	N/A	N/A
DeepSeek	3	Mar 1	N/A (mkt closed)	N/A	N/A	N/A (closed)	N/A	N/A	N/A
DeepSeek	4	Mar 2	24,850	24720	24980	24659	✗	0.8	Good
DeepSeek	5	Mar 3	N/A (mkt closed)	N/A	N/A	N/A (closed)	N/A	N/A	N/A
DeepSeek	6	Mar 4	24,730	24600	24860	24366	✗	1.5	Good
Perplexity	1	Feb 27	25,400	25200	25600	25141	✗	1.0	Good
Perplexity	2	Feb 28	N/A (mkt closed)	N/A	N/A	N/A (closed)	N/A	N/A	N/A
Perplexity	3	Mar 1	N/A (mkt closed)	N/A	N/A	N/A (closed)	N/A	N/A	N/A
Perplexity	4	Mar 2	25,000	24800	25200	24659	✗	1.4	Good
Perplexity	5	Mar 3	N/A (mkt closed)	N/A	N/A	N/A (closed)	N/A	N/A	N/A
Perplexity	6	Mar 4	24,600	24400	24800	24366	✗	1.0	Good
2C — MUMBAI HIGHEST TEMPERATURE (°C)
ACTUALS: Feb27=32° | Feb28=33° | Mar1=32° | Mar2=34° | Mar3=33.7° | Mar4=38.7° | PE threshold (absolute °C): Exc≤1° | Gd≤2° | Acc≤3° | Poor≤5°
MODEL	SQ	PRED DATE	PREDICTED	CI LOW	CI HIGH	ACTUAL	CI HIT	PE / ABS ERR	GRADE
Claude	1	Feb 27	33	31	35	32	✓	1.0	Excellent
Claude	2	Feb 27	34	31	36	32	✓	2.0	Good
Claude	3	Mar 2	34	32	36	34	✓	0.0	Excellent
Claude	4	Mar 2	34	32	36	34	✓	0.0	Excellent
Claude	5	Mar 3	34	32	36	33.7	✓	0.3	Excellent
Claude	6	Mar 4	34	32	36	38.7	✗	4.7	Poor
ChatGPT	1	Feb 27	33	31.2	35.6	32	✓	1.4	Good
ChatGPT	2	Feb 28	32	29	34	33	✓	1.5	Good
ChatGPT	3	Mar 2	33	31	35	34	✓	1.0	Excellent
ChatGPT	4	Mar 2	32	29.6	34	34	✓	2.2	Acceptable
ChatGPT	5	Mar 3	32	30	34.5	33.7	✓	1.5	Good
ChatGPT	6	Mar 4	33.5	30.8	36.1	38.7	✗	5.2	Poor
Gemini	1	Feb 27	32	30.5	33.5	32	✓	0.0	Excellent
Gemini	2	Feb 27	27	26	28	32	✗	5.0	Poor
Gemini	3	Mar 1	28	27	29.5	32	✗	4.0	Poor
Gemini	4	Mar 2	29	28	30.5	34	✗	5.0	Poor
Gemini	5	Mar 3	29	27.5	30.5	33.7	✗	4.7	Poor
Gemini	6	Mar 4	33	31	35	38.7	✗	5.7	Very Poor
Grok	1	Feb 27	34	32	36	32	✓	2.0	Good
Grok	2	Feb 28	31	29	33	33	✓	2.0	Good
Grok	3	Mar 1	33	31	35	32	✓	1.0	Excellent
Grok	4	Mar 2	34	32	36	34	✓	0.0	Excellent
Grok	5	Mar 3	35	33	37	33.7	✓	1.3	Good
Grok	6	Mar 4	36	34	38	38.7	✗	2.7	Acceptable
DeepSeek	1	Feb 27	32	31	33	32	✓	0.0	Excellent
DeepSeek	2	Feb 28	32	31	33	33	✓	1.0	Excellent
DeepSeek	3	Mar 1	31	30	32	32	✓	1.0	Excellent
DeepSeek	4	Mar 2	29	28	30	34	✗	5.0	Poor
DeepSeek	5	Mar 3	31	30	32	33.7	✗	2.7	Acceptable
DeepSeek	6	Mar 4	32	31	33	38.7	✗	6.7	Very Poor
Perplexity	1	Feb 27	26	24	28	32	✗	6.0	Very Poor
Perplexity	2	Feb 28	31	29	33	33	✓	2.0	Good
Perplexity	3	Mar 1	30	28	32	32	✓	2.0	Good
Perplexity	4	Mar 2	31	29	33	34	✗	3.0	Acceptable
Perplexity	5	Mar 3	30	28	32	33.7	✗	3.7	Poor
Perplexity	6	Mar 4	30	28	32	38.7	✗	8.7	Very Poor
2D — TOKYO LOWEST TEMPERATURE (°C)
ACTUALS: Feb27=7° | Feb28=10° | Mar1=6° | Mar2=8° | Mar3=4° | Mar4=4° | PE threshold (absolute °C): Exc≤1° | Gd≤2° | Acc≤3° | Poor≤5°
MODEL	SQ	PRED DATE	PREDICTED	CI LOW	CI HIGH	ACTUAL	CI HIT	PE / ABS ERR	GRADE
Claude	1	Feb 27	9	6	12	7	✓	2.0	Good
Claude	2	Feb 27	8	5	11	7	✓	1.0	Excellent
Claude	3	Mar 2	7	4	10	8	✓	1.0	Excellent
Claude	4	Mar 2	6	3	9	8	✓	2.0	Good
Claude	5	Mar 3	4	2	7	4	✓	0.0	Excellent
Claude	6	Mar 4	7	4	10	4	✓	3.0	Acceptable
ChatGPT	1	Feb 27	9	5.1	12.3	7	✓	1.7	Good
ChatGPT	2	Feb 28	10	6	12.5	10	✓	0.5	Excellent
ChatGPT	3	Mar 2	8	5	12	8	✓	0.5	Excellent
ChatGPT	4	Mar 2	9	5.2	12	8	✓	0.6	Excellent
ChatGPT	5	Mar 3	9	5.5	11.8	4	✗	4.8	Poor
ChatGPT	6	Mar 4	8.2	5.0	11.7	4	✗	4.2	Poor
Gemini	1	Feb 27	8	6.5	9.5	7	✓	1.0	Excellent
Gemini	2	Feb 27	7	6	8	7	✓	0.0	Excellent
Gemini	3	Mar 1	6	5	7.5	6	✓	0.0	Excellent
Gemini	4	Mar 2	8	6.5	9.5	8	✓	0.0	Excellent
Gemini	5	Mar 3	5	3.5	6.5	4	✓	1.0	Excellent
Gemini	6	Mar 4	4	3	5.5	4	✓	0.0	Excellent
Grok	1	Feb 27	7	3	11	7	✓	0.0	Excellent
Grok	2	Feb 28	5	2	8	10	✗	5.0	Poor
Grok	3	Mar 1	8	5	11	6	✓	2.0	Good
Grok	4	Mar 2	6	3	9	8	✓	2.0	Good
Grok	5	Mar 3	4	1	7	4	✓	0.0	Excellent
Grok	6	Mar 4	3	0	6	4	✓	1.0	Excellent
DeepSeek	1	Feb 27	6	4	8	7	✓	1.0	Excellent
DeepSeek	2	Feb 28	8	6	10	10	✓	2.0	Good
DeepSeek	3	Mar 1	8	6	10	6	✓	2.0	Good
DeepSeek	4	Mar 2	8	6	10	8	✓	0.0	Excellent
DeepSeek	5	Mar 3	9	7	11	4	✗	5.0	Poor
DeepSeek	6	Mar 4	8	6	10	4	✗	4.0	Poor
Perplexity	1	Feb 27	10	8	12	7	✗	3.0	Acceptable
Perplexity	2	Feb 28	6	4	8	10	✗	4.0	Poor
Perplexity	3	Mar 1	5	3	7	6	✓	1.0	Excellent
Perplexity	4	Mar 2	7	5	9	8	✓	1.0	Excellent
Perplexity	5	Mar 3	5	3	7	4	✓	1.0	Excellent
Perplexity	6	Mar 4	7	5	9	4	✗	3.0	Acceptable
2F — BITCOIN CLOSING PRICE (USD/BTC)
ACTUALS: Feb27=65,860 | Feb28=66,970 | Mar1=65,770 | Mar2=66,196 | Mar3=68,800 | Mar4=72,674 | PE threshold: Exc≤2% | Gd≤5% | Acc≤10% | Poor≤20%
MODEL	SQ	PRED DATE	PREDICTED	CI LOW	CI HIGH	ACTUAL	CI HIT	PE / ABS ERR	GRADE
Claude	1	Feb 27	68,900	59500	78300	65860	✓	4.6	Good
Claude	2	Feb 27	69,400	60500	78300	65860	✓	5.4	Acceptable
Claude	3	Mar 2	65,200	57400	73000	66196	✓	1.5	Excellent
Claude	4	Mar 2	63,700	54500	72900	66196	✓	3.8	Good
Claude	5	Mar 3	61,400	51500	71300	68800	✓	10.8	Poor
Claude	6	Mar 4	65,200	53800	76600	72674	✓	10.3	Poor
ChatGPT	1	Feb 27	69,420	60200	78900	65860	✓	5.4	Acceptable
ChatGPT	2	Feb 28	69,000	62000	76000	66970	✓	3.0	Good
ChatGPT	3	Mar 2	68,200	62000	74000	66196	✓	3.0	Good
ChatGPT	4	Mar 2	68,400	61500	75500	66196	✓	3.3	Good
ChatGPT	5	Mar 3	68,150	61400	74900	68800	✓	0.9	Excellent
ChatGPT	6	Mar 4	68,300	61600	75000	72674	✓	6.0	Acceptable
Gemini	1	Feb 27	61,450	58900	64000	65860	✗	6.7	Acceptable
Gemini	2	Feb 27	67,450	66800	68100	65860	✗	2.4	Good
Gemini	3	Mar 1	66,420	64800	68100	65770	✓	1.0	Excellent
Gemini	4	Mar 2	68,150	66400	69900	66196	✗	3.0	Good
Gemini	5	Mar 3	61,200	59000	63400	68800	✗	11.0	Poor
Gemini	6	Mar 4	61,850	59500	64200	72674	✗	14.9	Poor
Grok	1	Feb 27	68,000	65000	71000	65860	✓	3.2	Good
Grok	2	Feb 28	66,800	62200	71400	66970	✓	0.3	Excellent
Grok	3	Mar 1	68,000	63000	73000	65770	✓	3.4	Good
Grok	4	Mar 2	68,200	63500	72900	66196	✓	3.0	Good
Grok	5	Mar 3	69,000	64000	74000	68800	✓	0.3	Excellent
Grok	6	Mar 4	69,500	64500	74500	72674	✓	4.4	Good
DeepSeek	1	Feb 27	62,800	61500	64100	65860	✗	4.6	Good
DeepSeek	2	Feb 28	68,500	66800	70200	66970	✓	2.3	Good
DeepSeek	3	Mar 1	72,300	70500	74100	65770	✗	9.9	Acceptable
DeepSeek	4	Mar 2	66,500	64800	68200	66196	✓	0.5	Excellent
DeepSeek	5	Mar 3	84,200	82000	86400	68800	✗	22.4	Very Poor
DeepSeek	6	Mar 4	88,100	85900	90300	72674	✗	21.2	Very Poor
Perplexity	1	Feb 27	63,651	55800	71500	65860	✓	3.4	Good
Perplexity	2	Feb 28	76,667	72500	82500	66970	✗	14.5	Poor
Perplexity	3	Mar 1	80,000	76000	85000	65770	✗	21.6	Very Poor
Perplexity	4	Mar 2	82,000	78000	87000	66196	✗	23.9	Very Poor
Perplexity	5	Mar 3	73,640	70000	77300	68800	✗	7.0	Acceptable
Perplexity	6	Mar 4	69,000	65000	73000	72674	✓	5.1	Acceptable
2G — GOLD LOWEST PRICE (USD/oz)
ACTUALS: Feb27=5,205 | Feb28=5,183 | Mar1=5,278 | Mar2=5,278 | Mar3=5,074 | Mar4=5,073 | PE threshold: Exc≤2% | Gd≤5% | Acc≤10% | Poor≤20%. ⚠️ DeepSeek runs1,3,5,6 and Perplexity run5 used $/g → scored as wrong.
MODEL	SQ	PRED DATE	PREDICTED	CI LOW	CI HIGH	ACTUAL	CI HIT	PE / ABS ERR	GRADE
Claude	1	Feb 27	5,148	5090	5235	5204.9	✓	1.1	Excellent
Claude	2	Feb 27	5,158	5085	5228	5204.9	✓	0.9	Excellent
Claude	3	Mar 2	5,168	5080	5310	5278.1	✓	2.1	Good
Claude	4	Mar 2	5,190	5055	5345	5278.1	✓	1.7	Excellent
Claude	5	Mar 3	5,318	5175	5461	5073.6	✗	4.8	Good
Claude	6	Mar 4	5,310	5165	5455	5073	✗	4.7	Good
ChatGPT	1	Feb 27	5,172	5060	5325	5204.9	✓	0.6	Excellent
ChatGPT	2	Feb 28	5,150	5020	5300	5182.9	✓	0.6	Excellent
ChatGPT	3	Mar 2	5,140	4980	5300	5278.1	✓	2.6	Good
ChatGPT	4	Mar 2	5,130	4980	5300	5278.1	✓	2.8	Good
ChatGPT	5	Mar 3	5,140	4980	5300	5073.6	✓	1.3	Excellent
ChatGPT	6	Mar 4	5,135	4980	5290	5073	✓	1.2	Excellent
Gemini	1	Feb 27	5,053	5015	5090	5204.9	✗	2.9	Good
Gemini	2	Feb 27	5,147	5125	5169	5204.9	✗	1.1	Excellent
Gemini	3	Mar 1	5,212	5185	5240	5278.1	✗	1.3	Excellent
Gemini	4	Mar 2	5,185	5145	5225	5278.1	✗	1.8	Excellent
Gemini	5	Mar 3	5,245	5210	5280	5073.6	✗	3.4	Good
Gemini	6	Mar 4	5,310	5260	5360	5073	✗	4.7	Good
Grok	1	Feb 27	5,125	5050	5220	5204.9	✓	1.5	Excellent
Grok	2	Feb 28	5,140	5080	5200	5182.9	✓	0.8	Excellent
Grok	3	Mar 1	5,120	5060	5180	5278.1	✗	3.0	Good
Grok	4	Mar 2	5,085	5030	5140	5278.1	✗	3.7	Good
Grok	5	Mar 3	5,050	4990	5110	5073.6	✓	0.5	Excellent
Grok	6	Mar 4	5,015	4960	5070	5073	✗	1.1	Excellent
DeepSeek	1	Feb 27	2,875	2860	2890	5204.9	✗	N/A	Very Poor
DeepSeek	2	Feb 28	5,480	5430	5530	5182.9	✗	5.7	Acceptable
DeepSeek	3	Mar 1	2,878	2863	2893	5278.1	✗	N/A	Very Poor
DeepSeek	4	Mar 2	5,250	5200	5300	5278.1	✓	0.5	Excellent
DeepSeek	5	Mar 3	2,885	2870	2900	5073.6	✗	N/A	Very Poor
DeepSeek	6	Mar 4	2,892	2877	2907	5073	✗	N/A	Very Poor
Perplexity	1	Feb 27	5,053	5000	5106	5204.9	✗	2.9	Good
Perplexity	2	Feb 28	5,052	5020	5085	5182.9	✗	2.5	Good
Perplexity	3	Mar 1	5,050	5010	5090	5278.1	✗	4.3	Good
Perplexity	4	Mar 2	5,045	5010	5080	5278.1	✗	4.4	Good
Perplexity	5	Mar 3	3,627	3600	3655	5073.6	✗	N/A	Very Poor
Perplexity	6	Mar 4	5,208	5150	5265	5073	✗	2.7	Good
2E — T20 CRICKET: TOP RUN SCORER (Name + Runs)
Scoreable dates: Feb27 (Will Jacks 32), Feb28 (Farhan 100), Mar1 (Samson 97), Mar4 (Finn Allen 100*). Mar2 and Mar3: no match scheduled. Note: Feb27 actual (32 runs) was an unusually low score; Feb28, Mar1, Mar4 all scored 97-100 runs. Name scoring: last-name match. Perplexity: probability-format only, no numeric CI.
MODEL	SQ	PRED DATE	PRED NAME	PRED RUNS	CI LO	CI HI	ACT NAME	ACT RUNS	NAME ✓/✗	RUNS CI HIT	RUNS PE%	NOTE
Claude	1	Feb 27	Harry Brook	62	18	108	Will Jacks	32	✗	✓	94%
Claude	2	Feb 27	Babar Azam	58	14	109	Will Jacks	32	✗	✓	81%
Claude	Seq3 — Mar 2 — NO MATCH (excluded)
Claude	Seq4 — Mar 2 — NO MATCH (excluded)
Claude	Seq5 — Mar 3 — NO MATCH (excluded)
Claude	6	Mar 4	Heinrich Klaasen	52	12	96	Finn Allen	100	✗	✗	48%
ChatGPT	1	Feb 27	Devon Conway	58	16	104	Will Jacks	32	✗	✓	81%
ChatGPT	2	Feb 28	(no name)	72	22	132	Sahibzada Farhan	100	N/A	✓	28%
ChatGPT	Seq3 — Mar 2 — NO MATCH (excluded)
ChatGPT	Seq4 — Mar 2 — NO MATCH (excluded)
ChatGPT	Seq5 — Mar 3 — NO MATCH (excluded)
ChatGPT	6	Mar 4	Heinrich Klaasen	64	20	108	Finn Allen	100	✓	✓	36%
Gemini	1	Feb 27	Finn Allen	N/A	42	88	Will Jacks	32	✗	✗	N/A
Gemini	2	Feb 27	Harry Brook	58	42	74	Will Jacks	32	✗	✗	81%
Gemini	3	Mar 1	Yashasvi Jaiswal	64	28	112	Sanju Samson	97	✗	✓	34%
Gemini	Seq4 — Mar 2 — NO MATCH (excluded)
Gemini	Seq5 — Mar 3 — NO MATCH (excluded)
Gemini	6	Mar 4	Quinton de Kock	52	24	88	Finn Allen	100	✗	✗	48%
Grok	1	Feb 27	(no name)	85	50	125	Will Jacks	32	N/A	✗	166%
Grok	2	Feb 28	Babar Azam	64	22	110	Sahibzada Farhan	100	✗	✓	36%
Grok	3	Mar 1	Rohit Sharma	68	20	115	Sanju Samson	97	✗	✓	30%
Grok	Seq4 — Mar 2 — NO MATCH (excluded)
Grok	Seq5 — Mar 3 — NO MATCH (excluded)
Grok	6	Mar 4	David Warner	70	25	115	Finn Allen	100	✗	✓	30%
DeepSeek	1	Feb 27	(no name)	78	65	91	Will Jacks	32	N/A	✗	144%
DeepSeek	2	Feb 28	(no name)	72	60	84	Sahibzada Farhan	100	N/A	✗	28%
DeepSeek	3	Mar 1	(no name)	81	68	94	Sanju Samson	97	N/A	✗	16%
DeepSeek	Seq4 — Mar 2 — NO MATCH (excluded)
DeepSeek	Seq5 — Mar 3 — NO MATCH (excluded)
DeepSeek	6	Mar 4	(no name)	74	62	86	Finn Allen	100	N/A	✗	26%
Perplexity	1	Feb 27	Harry Brook	N/A	N/A	N/A	Will Jacks	32	✗	N/A	N/A
Perplexity	2	Feb 28	Suryakumar Yadav	N/A	N/A	N/A	Sahibzada Farhan	100	✗	N/A	N/A
Perplexity	3	Mar 1	Nicholas Pooran	N/A	N/A	N/A	Sanju Samson	97	✗	N/A	N/A
Perplexity	Seq4 — Mar 2 — NO MATCH (excluded)
Perplexity	Seq5 — Mar 3 — NO MATCH (excluded)
Perplexity	6	Mar 4	Devon Conway	N/A	N/A	N/A	Finn Allen	100	✗	N/A	N/A
PART 3 — OVERALL MODEL RANKINGS
RANK	MODEL	CI HITS	CI RATE	CI GRADE	MEAN PE	PE SCORE /100	OVERALL SCORE	OVERALL GRADE	SPX CI RATE	NIFTY CI RATE	BTC CI RATE	GOLD CI RATE	TEMP CI RATE	HEADLINE
1	Claude	32/38	84%	Well calibrated	6.1%	82	83	A VERY GOOD	6/6 100%	3/5 60%	6/6 100%	4/6 67%	M:5/6 83% T:6/6 100%	Best CI calibration (84%, closest to 90% target). Accurate SPX, Nifty, BTC. Gold drop on Mar4 missed by all models. Clean methodology.
2	ChatGPT	30/36	83%	Well calibrated	7.7%	77	80	A- GOOD*	5/5 100%	1/4 25%	6/6 100%	4/6 67%	T20: 3/3 100% | BTC: 6/6 100% | Gold: 6/6 100%	83% CI (30/36; run6 data entry error corrected — see Finding 6). Nifty CI calibration weakness: 1/4 hit rate (25%) — intervals too narrow across all scoreable runs. Tokyo also below target: 4/6 (67%). T20, BTC, Gold all 100%. Well calibrated for financial and crypto variables.
3	Grok	27/35	77%	Well calibrated	7.5%	77	77	B+ GOOD	4/4 100%	1/3 33%	6/6 100%	3/6 50%	M:5/6 83% T:5/6 83%	Second-best CI calibration (77%). Balanced approach — CIs wide enough without being uninformative. Only model with CI for every T20 match except no-match days.
4	Gemini	11/37	30%	Severely narrow	5.3%	84	57	B CALIBRATION FAIL	2/5 40%	0/4 0%	1/6 17%	0/6 0%	M:1/6 17% T:6/6 100%	Best point estimate accuracy (5.3% PE) but 30% CI calibration. CIs are 5-10× too narrow — essentially reporting prediction intervals as forecasts. Technical skill, poor uncertainty quantification.
5	Perplexity	9/31	29%	Severely narrow	13.3%	60	45	D+ WEAK	2/4 50%	0/3 0%	2/6 33%	0/6 0%	M:2/6 33% T:3/6 50%	Frozen SPX predictions (unchanged across 3 consecutive runs). BTC severely overestimated mid-study. Gold wrong units run5. Wide CIs save CI rate on some vars.
6	DeepSeek	11/35	31%	Severely narrow	14.2%	58	44	D POOR	1/4 25%	0/3 0%	2/6 33%	1/6 17%	M:3/6 50% T:4/6 67%	SPX systematically off (6k range predicted vs 6.8-6.9k actual). Gold wrong units 4/6 runs. BTC Mar5,6 doubled actuals. Only run4 SPX was accurate.
PART 4 — KEY FINDINGS
FINDING 1 PRECISION vs CALIBRATION		Gemini achieves the best point estimate accuracy (5.3% mean error) across all 6 runs but the worst CI calibration (30%, vs 90% target). Its CIs are structurally too narrow — e.g., Bitcoin CI range of $1,300 for a 90% interval, when daily BTC vol alone is ~$2,000+. This is the classic precision-vs-calibration tradeoff. A well-calibrated model should be willing to say "the answer could be anywhere …
FINDING 2 SPX ANOMALIES		DeepSeek SPX: 5 of 6 predictions in range 6,015–6,068 vs actual market of 6,840–6,901 (~12% low). With CIs of only ±30pts, these runs would require SPX to be at Feb 2025 levels — clearly stale data. Only run 4 (6,890 CI [6,850–6,930]) was accurate, catching the actual 6,901. Perplexity SPX: frozen at 7,357 for three consecutive runs, then 7,447 for two — no adaptation to the actual market level o…
FINDING 3 T20 UPSETS — All Failed		Feb 27 T20: Will Jacks scored just 32 runs — well below all model predictions (58–85 runs). Only Claude 1,2 and ChatGPT 1 had CIs starting low enough (14–18) to technically capture 32. The other models started their CIs at 42–65, missing entirely. Feb 28/Mar 1: Farhan 100 and Samson 97 — high scores that most models with wider CIs did capture (any CI extending to 110+ would cover these). Mar 4: F…
FINDING 4 BTC MARCH 4 Surprise		Bitcoin on March 4 closed at $72,674 — the highest value in the study period and a $4,000+ jump from the prior session ($68,800). Models that maintained wider CIs captured it: Claude (53,800–76,600 ✓), ChatGPT (same), Grok (64,500–74,500 ✓), Perplexity (65,000–73,000 ✓). Gemini missed completely (59,500–64,200 ✗) — its tight CIs excluded the actual. Interestingly BTC was the variable where the wi…
FINDING 5 GOLD DROP — All Missed		Gold fell from $5,278 (Mar2) to $5,073 (Mar4) — a $205 drop in 48 hours. Every model predicted gold would hold around $5,100–$5,350 for Mar4, with CIs starting at ~$4,960. Grok came closest (5,015, CI [4,960–5,070]) — the CI upper bound was 5,070 vs actual 5,073, missing by just $3. All other models missed. This was the hardest variable in the study.
FINDING 6 CHATGPT RUN6 DATA CORRECTED		ChatGPT run 6 (03-Mar-2026, predicting 04-Mar-2026) was initially entered with values matching Claude run 6 (a data entry error) — a data entry error identified during quality review. The correct ChatGPT predictions have been verified from the original session log (timestamp 08:45 IST, 03-Mar-2026) and are: S&P 6,980 [6,820–7,140], Nifty 25,260 [24,930–25,700], Mumbai 33.5°C [30.8–36.1°C], Tokyo …
OVERALL SCORING SUMMARY		Ranking: (1) Claude — A: best CI calibration 84%, solid PE 6.1%, clean data. (2) ChatGPT — A-: 83% CI (30/36; data entry error in run6 identified and corrected — see Finding 6). (3) Grok — B+: 77% CI, 7.5% PE, balanced approach, T20 CIs most informative. (4) Gemini — B (calibration fail): 5.3% PE (best) but 30% CI (worst) — overconfident. (5) DeepSeek — D: systematic SPX errors, gold wrong units …

## Sheet: Meta-Statistics
META-STATISTICS | Cross-protocol analysis: V1 (72 runs) · V3 (34 runs) · V4 (36 runs) | 6 models | Spearman correlations, consistency scores, reliability signatures, multi-protocol leaderboard
S1 — PROTOCOL OVERVIEW
PROTOCOL	RUNS	MODELS	SESSIONS PER MODEL	WHAT IS MEASURED	PRIMARY METRIC	KEY FORMULA DIFFERENCES
V1	72	6	12	5 financial metrics (entropy, deviation, acceleration, dispersion, RC) computed from 3-predictor market bias model. Self-audit required. Regime classification.	Metric accuracy (MATCH/NEAR/WRONG)	Entropy: 3dp. Accel: 1st derivative ΔD. RANGING RC: BULL=0, BEAR=0, NEUT=+1. No CF rule. 3 regimes.
V3	34	6 (ChatGPT 4)	6	Same 5 metrics with formula changes. CF compliance strict rule. Session numbering required for 2nd-derivative accel. Added VOLATILE regime.	Metric accuracy + protocol compliance	Entropy: 4dp. Accel: 2nd derivative Δ²D, sessions 1+2=N/A. RANGING RC: BULL=−1, BEAR=−1, NEUT=+1. CF regime table. 4 regimes.
V4	36	6	6	7 independent real-world variables predicted with 90% CI: SPX, Nifty, Mumbai temp, Tokyo temp, T20 top scorer, Bitcoin, Gold.	CI calibration rate + % point error	Completely different from V1/V3. CI hit rate (should be ~90%). PE accuracy by variable type.
S2 — V1 STATISTICS | 72 runs, 6 models × 12 sessions, 5 metrics
S2A — Metric Accuracy Matrix (% of runs scoring MATCH or NEAR×0.5)
MODEL	ENTROPY (H_ENT)	DEVIATION (D)	DISPERSION (DISP)	REGIME CONS (RC)	ACCELERATION (ACCEL)	OVERALL ACC %	RANK	WEAKEST METRIC	STRONGEST
Claude	100	100	91.7	100	91.7	96.7	1	DISP	ENT
Grok	100	100	91.7	100	83.3	95	2	ACCEL	ENT
Gemini	100	100	4.2	83.3	91.7	75.8	3	DISP	ENT
ChatGPT	66.7	66.7	37.5	75	8.3	50.8	5	ACCEL	ENT
DeepSeek	58.3	58.3	45.8	100	8.3	54.2	4	ACCEL	RC
Perplexity	0	0	0	58.3	41.7	20	6	ENT	RC
S2B — Metric Difficulty (cross-model accuracy per metric)
METRIC	MEAN ACC %	STDEV	MIN (worst model)	MAX (best model)	RANGE	HARDEST MODEL	EASIEST MODEL	ASSESSMENT
Entropy	70.8	39.3	0% (Perplexity)	100% (Claude)	100	Perplexity	Claude	Entropy: High accuracy across most models. Perplexity V1 0% (used raw H not normalised). DeepSeek 58% (wrong formula variant).
Deviation	70.8	39.3	0% (Perplexity)	100% (Claude)	100	Perplexity	Claude	Deviation = 1−entropy. If entropy wrong, deviation wrong. Mirrors entropy accuracy pattern exactly.
Dispersion	45.1	40.3	0% (Perplexity)	92% (Claude)	91.7	Perplexity	Claude	Most variable metric across models. Gemini 4% V1 (wrong formula — sqrt missing). ChatGPT 38%.
Regime Cons.	86.1	17.2	58% (Perplexity)	100% (Claude)	41.7	Perplexity	Claude	High accuracy overall. All models understand regime→bias mapping well. Perplexity 58% (CF confusion).
Acceleration	54.2	40.1	8% (ChatGPT)	92% (Claude)	83.3	ChatGPT	Claude	Hardest metric on average. Requires session memory. ChatGPT/DeepSeek 8% (no memory). Many models output null vs 0.
S2C — V1 Regime Distribution & Indeterminate Rate
MODEL	BULLISH runs	BEARISH runs	RANGING runs	VOLATILE runs	INDET %	ACC in TRENDING %	ACC in INDET %	DIFF
Claude	5	5	2	0	16.7	96	100	4
ChatGPT	9	0	3	0	25	72.2	N/A	-72.2
Gemini	10	0	0	2	16.7	79	60	-19
Grok	12	0	0	0	0	95	N/A	N/A
DeepSeek	11	1	0	0	0	54.2	N/A	N/A
Perplexity	12	0	0	0	0	20	N/A	N/A
S3 — V3 STATISTICS | 34 runs, 5–6 sessions per model, 5 metrics + protocol compliance
S3A — V3 Metric Accuracy + Protocol Compliance Matrix
MODEL	H_NORM %	D %	DISP %	RC %	ACCEL %	METRIC OVERALL	CF COMPL %	SN INTEG %	SELF AUDIT %	INDET RUNS	V3 GRADE
Claude	100	100	100	100	100	100	100	100	100	6	A+ PERFECT
ChatGPT	100	33	50	67	100	80	100	25	25	0	B GOOD
Gemini	100	100	83.3	100	100	96.7	100	100	100	1	A EXCELLENT
Grok	100	100	100	100	83.3	96.7	100	33.3	83.3	6	A EXCELLENT
DeepSeek	16.7	16.7	33.3	100	58.3	45	100	100	0	0	D POOR
Perplexity	100	100	16.7	33.3	33.3	56.7	100	16.7	16.7	0	D POOR
S3B — V1 → V3 Change Matrix (percentage point change in overall accuracy)
MODEL	V1 ACC %	V3 ACC %	DELTA pp	DIRECTION	FORMULA METRIC CHANGE (H)	FORMULA METRIC CHANGE (RC)	CF COMPLIANCE IMPACT	DRIVER OF CHANGE
Claude	96.7	100	+3.3	↑ GAIN	100%→100%	100%→100%	100%	Already near-perfect in V1 (97%). V3 gains last 3% via cleaner CF rule eliminating edge cases. Perfect compliance.
ChatGPT	50.8	80	+29.2	↑↑ MAJOR GAIN	75%→100%	75%→100%	100%	Entropy/Dev improved (75%→100%) but dispersion dropped (38%→50%) and accel worsened (8%→50%). Session memory broken — SN always 1 after run1 makes 2nd-deriv accel impossible.
Gemini	75.8	96.7	+20.8	↑↑ MAJOR GAIN	100%→100%	83%→100%	100%	Massive improvement: V3 entropy warning heeded (dispersion partially corrected). Main gain: stopped using raw H instead of H_norm. Partial dispersion fix.
Grok	95	96.7	+1.7	→ STABLE	100%→100%	100%→100%	100%	Already accurate in V1. Small accel regression (83%→83%). V3 frozen inputs cause some accel N/A errors. Net stable.
DeepSeek	54.2	45	-9.2	↓ REGRESSION	58%→17%	100%→100%	100%	Regression: V3 entropy formula explicitly warned but still wrong (0.6309 series). Entropy/Dev fell 58%→17%. RC/accel improved due to explicit V3 rules. Net negative.
Perplexity	20	56.7	+36.7	↑↑ MAJOR GAIN	0%→100%	58%→33%	100%	Improvement: entropy now correct (0%→100%). RC partially corrected (58%→33% — new error with wrong regime row). Net positive despite RC regression.
S4 — V4 STATISTICS | 36 runs (6 models × 6 sessions), 7 variables, 90% CI calibration
S4A — CI Hit Rate Matrix: Model × Variable (% of scoreable runs where actual ∈ 90% CI)
MODEL	S&P HIGH	NIFTY LOW	MUMBAI TEMP	TOKYO TEMP	T20 RUNS	BTC CLOSE	GOLD LOW	OVERALL CI %	VS 90% TARGET	BEST VARIABLE	WORST VARIABLE
Claude	100	60	83	100	67	100	67	84	-6pp	SPX	Nifty
ChatGPT	100	25	83	67	100	100	100	83	-7pp	SPX/T20/BTC/Gold	Nifty
Gemini	40	0	17	100	25	17	0	30	-60pp	Tokyo	Nifty
Grok	100	33	83	83	75	100	50	77	-13pp	SPX	Nifty
DeepSeek	25	0	50	67	0	33	17	31	-59pp	Tokyo	Nifty
Perplexity	50	0	33	50		33	0	29	-61pp	SPX	Nifty
S4B — Variable Difficulty (cross-model CI hit rate and PE per variable)
VARIABLE	SCOREABLE RUNS	MEAN CI HIT %	CI STDEV	BEST MODEL CI %	WORST MODEL CI %	CI DIFFICULTY	MEAN PE ACROSS MODELS	STRUCTURAL ISSUE
S&P 500 High	28	71	46	100% (Claude)	25% (DeepSeek)	MODERATE (40-75%)	3.0%	Closed Feb28+Mar1. DeepSeek predicts ~6,015 (stale 2025 data). Perplexity frozen.
Nifty Low	22	27	45.6	60% (Claude)	0% (Gemini)	HARD (<40%)	1.5%	Closed Feb28, Mar1, Mar3. Most models use too-tight CIs for Indian market.
Mumbai Temp	36	58	50	83% (Claude)	17% (Gemini)	MODERATE (40-75%)	2.7%	Always available. Mar4 actual=38.7°C — significant spike above all predictions.
Tokyo Temp	36	81	40.1	100% (Claude)	50% (Perplexity)	EASY (>75%)	1.6%	Always available. Most models capture well. Mar3 (4°C) sometimes missed.
T20 Top Scorer Runs	18	44	51.1	75% (Grok)	0% (DeepSeek)	MODERATE (40-75%)	60.0%	4 scoreable dates. Feb27 Jacks=32 (below all predictions). Mar4 Allen=100*.
Bitcoin Close	36	64	48.7	100% (Claude)	17% (Gemini)	MODERATE (40-75%)	7.0%	BTC Mar4=72,674 — surprise surge. Gemini missed. Wide-CI models captured.
Gold Low	36	36	48.7	83% (ChatGPT)	0% (Gemini)	HARD (<40%)	2.5%	Mar4 gold dropped to $5,073. DeepSeek/Perplexity wrong units on some runs.
S4C — CI Width Analysis (width of 90% CI relative to actual market volatility)
Expected widths for a true 90% CI: SPX ≈±250pts (range 500), Nifty ≈±600pts, BTC ≈±$8,000, Gold ≈±$300, Temp ≈±4°C
MODEL	AVG SPX CI WIDTH	AVG NIFTY CI WIDTH	AVG BTC CI WIDTH	AVG GOLD CI WIDTH	AVG MUMBAI CI WIDTH (°C)	AVG TOKYO CI WIDTH (°C)	CI WIDTH ASSESSMENT
Claude	356	955	$18,867	$231	4.2°	5.8°	APPROPRIATE (0.7–2×)
ChatGPT	349	810	$14,267	$299	4.4°	6.6°	NARROW (0.7–1.4×)
Gemini	98	214	$3,717	$71	2.8°	2.7°	NARROW (0.3–0.7×)
Grok	418	647	$9,100	$125	4.0°	6.3°	APPROPRIATE (0.7–2×)
DeepSeek	68	260	$3,633	$53	2.0°	4.0°	SEVERELY NARROW (<0.3×)
Perplexity	1,014	400	$9,833	$82	4.0°	4.0°	APPROPRIATE (0.7–2×)
S5 — META-STATISTICS | Cross-protocol analysis across V1, V3, V4
S5A — Cross-Protocol Ranking Matrix + Spearman Rank Correlation
V4 ranking uses CI calibration as primary metric (most comparable to V1/V3 accuracy). Spearman ρ measures rank-order consistency between protocols.
MODEL	V1 ACC %	V1 RANK	V3 ACC %	V3 RANK	V4 CI %	V4 RANK	V4 PE %	V4 PE RANK	RANK RANGE (max-min)	RANK STDEV	CONSISTENCY
Claude	96.7	1	100	1	84.2	1	6.1	2	0	0	VERY CONSISTENT
ChatGPT	50.8	5	80	4	83.3	2	7.7	4	3	1.53	MODERATE
Gemini	75.8	3	96.7	2	29.7	5	5.3	1	3	1.53	MODERATE
Grok	95	2	96.7	3	77.1	3	7.5	3	1	0.58	VERY CONSISTENT
DeepSeek	54.2	4	45	6	31.4	4	14.2	6	2	1.15	CONSISTENT
Perplexity	20	6	56.7	5	29	6	13.3	5	1	0.58	VERY CONSISTENT
CORRELATION	V1 vs V3	V1 vs V4-CI	V3 vs V4-CI	V1 vs V4-PE	MEAN ρ	INTERPRETATION
Spearman ρ	0.886	0.714	0.486	0.771	0.695 *	Moderate positive correlation — general trend consistent but specific rankings shift by protocol. * Mean of CI-based correlations only (V1vV3, V1vV4-CI, V3vV4-CI). Excluding V1 vs V4-PE (ρ=0.771) which uses PE rank not CI rank. Mean of all four = 0.714.
					* See note →	Mean ρ computed over 3 CI-rank correlations (V1vV3, V1vV4-CI, V3vV4-CI). V1 vs V4-PE ρ=0.771 shown separately (PE rank ≠ CI rank). Mean of all four ρ = 0.714.
S5B — Model Consistency Scores (performance stability across protocols and conditions)
MODEL	BEST PROTOCOL	WORST PROTOCOL	SCORE RANGE	TRENDING/ INDET DIFF	V1→V3 CONSISTENCY	STRUCTURAL WEAKNESS	RELIABILITY PROFILE
Claude	V3 (100%)	V4-CI (84%)	15.8	+4.0pp	+3.3pp	None identified. Consistent across all three protocols.	Formula-compliant, data-live, CI-appropriate. Consistent A/A+ across all tasks.
ChatGPT	V4-CI (83%)	V1 (51%)	29.2	N/A (no indet runs)	+25.8pp	Session memory — SN breaks in V3 making 2nd-deriv accel impossible. Nifty CIs consistently too tight across all runs.	Strong on stateless formulas, weak on session continuity. High V4 CI rate (83%) despite tight Nifty intervals.
Gemini	V3 (97%)	V4-CI (30%)	66.9	-19.0pp	+20.8pp	CI overconfidence — technically accurate but fails to quantify uncertainty. Tight CIs failed 70% of time.	Best point prediction accuracy but severely miscalibrated uncertainty. Good at "where" but not "how confident."
Grok	V3 (97%)	V4-CI (77%)	19.5	N/A (no indet runs)	+1.7pp	Data freshness — inputs frozen Feb27-Mar2 in V3. Predicted wrong match in V4 T20 run6.	Balanced, wide-CI approach. Solid formulaically. Limited by data freshness in V3.
DeepSeek	V1 (54%)	V4-CI (31%)	22.7	N/A (no indet runs)	-9.2pp	Entropy formula — custom variant used despite explicit warning in V3. SPX stale data in V4 (5 of 6 runs).	Correct RC/CF but wrong entropy formula across both V1 and V3. SPX data fundamentally stale in V4.
Perplexity	V3 (57%)	V1 (20%)	36.7	N/A (no indet runs)	+36.7pp	Session memory absent — no updating across sessions. SPX frozen 3 consecutive runs in V4. Gold units error.	Improved from V1 to V3 on entropy. But stateless — cannot carry context across sessions in any protocol.
S5C — Error Pattern Analysis (systematic vs random errors, formula vs conceptual)
MODEL	ERROR TYPE	V1 ERRORS	V3 ERRORS	V4 ERRORS
Claude	NONE / RARE	Run1 accel=null reported vs null (ERR scored). Occasional dispersion rounding. No systematic error.	Zero errors across all 34 scored metrics. Perfect. No formula, compliance, or protocol errors.	Gold drop on Mar4 missed (universal across all models). No model-specific errors.
ChatGPT	FORMULA + SESSION	Dispersion formula wrong (~38% hit V1) — missing confidence weight in formula or wrong inputs. Accel 8% — no session memory.	Dispersion improved to 50% but accel 50% because SN=1 always after run1. 2nd derivative impossible without session chain.	Nifty CI too tight on Mar2 and Mar4 (actual 24366/24659 below all predicted lower bounds). T20 runs CI well-calibrated. Gold and BTC CIs accurate.
Gemini	CI OVERCONFIDENCE	V1 dispersion 4% — sqrt missing from formula (reports variance not stdev). Entropy correct.	V3 dispersion 83% — partially fixed. Entropy excellent. No CF or SN issues.	Point estimates best in study (5.3% PE) but CIs 5-10× too narrow. Systematic overconfidence in uncertainty quantification.
Grok	DATA FRESHNESS	Acceleration 83% — occasional session boundary issues. Otherwise highly accurate.	SN error run3 (reported 2 not 3). Inputs frozen Feb27-Mar2: same SPX and midpoints across 3 runs.	T20 run6: predicted wrong match (AUS vs SA vs actual SA vs NZ semi). Gold missed Mar4 drop. Otherwise solid.
DeepSeek	FORMULA SYSTEMATIC	Entropy/Deviation 58% — non-standard formula variant (confidence-weighted, not equal-weight Shannon). Accel 8% — no session memory.	Entropy 17% despite explicit V3 warning. Same formula variant persists across 5/6 runs. RC and CF correct due to explicit V3 rules.	SPX stale (6015-6068 range for ~6840-6901 market). Gold wrong units 4/6 runs. BTC doubled actual runs 5-6.
Perplexity	STATELESS + CALIBRATION	Entropy 0% — consistently reports raw H not H_norm. Dispersion 0% — wrong formula throughout V1.	Entropy now correct (100%) but RC wrong (33%) — switched to wrong regime row for BEARISH. SN=1 always.	SPX frozen (7357 repeated 3 runs, 7447 repeated 2 runs). BTC overestimated by $10-15k mid-study. Gold units error run5.
S5D — Hardest Conditions Across All Protocols (where all or most models failed)
Ranked by number of models failing (6=all failed, 1=only one failed). Reveals protocol design difficulty and market unpredictability.
#	PROTOCOL	CONDITION / VARIABLE	MODELS FAILED	% FAIL RATE	FAILURE NATURE	REASON
1	V1+V3	T20 top scorer names (all runs)	6	100%	Categorical	Zero correct name predictions across 36 scoreable T20 runs. T20 results driven by match context and team composition unknown to models.
2	V4	Gold Mar4 drop ($5,278→$5,073)	5	83%	Sudden drop	Gold fell $205 in 48hrs. All models predicted ≥$5,100. Grok came within $3 on CI upper bound. Demand/geopolitical shock not foreseeable.
3	V4	T20 Feb27 Will Jacks 32 runs	5	83%	Below all CIs	Jacks scored 32 — all models predicted 52-85 runs. Claude/ChatGPT CIs started at 14-18, capturing 32. Others started at 42-65, failed.
4	V1	Dispersion formula	5	83%	Formula error	Gemini 4% (sqrt missing), ChatGPT 38% (weight error). Requires exact confidence-weighted std dev. Correct formula requires careful implementation.
5	V1+V3	Acceleration (session memory)	4	67%	Memory required	Requires PREV_DEV. Models without session memory (ChatGPT, DeepSeek, Perplexity) score ~8%. V3 worse: needs 2 prior sessions.
6	V4	Nifty CI hit rate	4	67%	Tight CIs	Gemini (0%), Nifty (0%), Perplexity (0%), DeepSeek (0%). Only Claude (60%) and ChatGPT (50%) and Grok (33%) got any hits.
7	V1	V1 entropy Perplexity	1	17%	Formula miss	Perplexity 0% V1 entropy — uses raw H not normalised. Fixed in V3 (100%). Most models got this right in V1.
8	V4	BTC Mar4 surge ($72,674)	2	33%	Above tight CIs	Gemini CI [59,500-64,200] missed. Perplexity [65,000-73,000] barely missed. Wide-CI models all captured.
9	V3	DeepSeek entropy formula	1	17%	Systematic	Only DeepSeek used confidence-weighted entropy despite explicit V3 warning. All other models corrected or were already correct.
S5E — Protocol Difficulty Comparison
PROTOCOL	MEAN ACC / CI ACROSS MODELS	STDEV ACROSS MODELS	TOP PERFORMER	BOTTOM PERFORMER	SPREAD (top−bottom)	DIFFICULTY RANK	PRIMARY CHALLENGE
V4-CI	55.8	28.3	Claude (84%)	Perplexity (29%)	55.2	1	V4 CI calibration rate. Main challenge: appropriate uncertainty quantification. Gemini/DeepSeek/Perplexity < 35%.
V1	66	29.2	Claude (97%)	Perplexity (20%)	76.7	2	Mean of all 5 metric accuracy scores, 12 runs each. Main challenge: entropy formula variants, dispersion formula, session memory.
V3	79.2	23.3	Claude (100%)	DeepSeek (45%)	55	3	V3 metric accuracy. Main challenge: 2nd-derivative accel (requires 3-session chain), tighter entropy precision, strict CF rule.
S5F — Model Reliability Signatures (what each model is consistently good / consistently bad at across all 3 protocols)
MODEL	CONSISTENT STRENGTHS	CONSISTENT WEAKNESSES	SIGNATURE FINDING
Claude	Formula accuracy: entropy/deviation exact in V1 (100%), V3 (100%). Regime consistency RC 100% V1+V3. CF compliance 100% V3. CI calibration closest to 90% target in V4 (84%). Session memory intact.	Very minor: Gold drop Mar4 (missed — universal failure). V1 accel run1 null-vs-null (scored ERR).	The Reference Model. Consistent A/A+ across all three protocols. Only model with zero systematic errors.
ChatGPT	Entropy/deviation V3 100%. RC 75%+ both protocols. CF compliance V3 100%. V4 CI rate 83%.	Session memory: SN breaks in V3 (accel impossible). Dispersion formula error V1 (38%). Nifty CIs persistently too tight in V4 (1/4 hit rate).	Memory-Dependent. Excellent when task is stateless. Falls apart when cross-session tracking required.
Gemini	Point estimate accuracy: best in study at V4 PE=5.3%. Entropy V1+V3 100%. Deviation V1+V3 100%. CF compliance V3 100%.	CI overconfidence: V4 CI hit rate 30% — CIs 5-10× too narrow. V1 dispersion 4% (sqrt missing). Took 3 sessions to reach correct SPX in V4.	Precision without Calibration. Knows where but not how uncertain. V1 dispersion bug partially fixed by V3.
Grok	Entropy/deviation 100% both. RC 100% both. CF V3 100%. V4 CI 77% — balanced. T20 CIs appropriately wide.	Data freshness V3: identical SPX/midpoints 3 consecutive sessions. T20 run6: predicted wrong match.	Consistently Solid. Second most reliable overall. Limited only by data staleness in V3, not by formula errors.
DeepSeek	RC 100% V1+V3. CF V3 100% (explicit rules helped). Accel V3 58% (improved). Some V4 financial predictions reasonable.	Entropy formula: custom variant persists across V1 (58%) and V3 (17%) despite explicit warning. SPX stale V4 (5/6 runs). Gold wrong units 4/6. BTC doubled actual mid-study.	Systematic Formula Bias. Cannot override its entropy variant. Data quality failures in V4 not seen in other models.
Perplexity	Entropy corrected V1→V3 (0%→100%) — largest single improvement in study. CF V3 100%. Tokyo CI reasonable.	Stateless: SN=1 always in V3. SPX frozen in V4 (no updating). RC wrong in V3 (new error after fixing entropy). BTC overestimated by $10-15k mid-study.	Improving but Stateless. Cannot carry context. Each session starts fresh — fundamental limitation for session-dependent metrics.
S5G — OVERALL MULTI-PROTOCOL LEADERBOARD (composite across V1, V3, V4)
Composite = (V1 acc + V3 acc + V4 CI rate) / 3. Secondary sort by rank consistency (lower stdev = better).
FINAL RANK	MODEL	V1 ACC %	V3 ACC %	V4 CI %	V4 PE %	COMPOSITE SCORE	RANK STDEV	OVERALL GRADE	MULTI-PROTOCOL VERDICT
1	Claude	96.7	100	84.2	6.1	93.6	0	A+ GOLD STANDARD	Consistently the strongest model across all three protocols. Perfect V3, best V4 CI, high V1. Only model with no systematic failures. Gold standard.
2	Grok	95	96.7	77.1	7.5	89.6	0.58	A VERY GOOD	Second overall on composite. Strong V1, excellent V3. V4 CI 77% — only behind Claude. No formula errors. Limited by V3 data freshness.
3	ChatGPT	50.8	80	83.3	7.7	71.4	1.53	A- GOOD (memory/Nifty caveat)	Strong V1 and V4, weaker V3 (session memory gap). Nifty CI calibration weakness in V4 (25% hit rate vs 90% target). Genuine #3 if V3 memory limitation addressed.
4	Gemini	75.8	96.7	29.7	5.3	67.4	1.53	B MIXED (CI failure)	V3 excellent (97%). V4 CI drag (30%) pulls composite down significantly. Would rank #2 if CI calibration were appropriate.
5	DeepSeek	54.2	45	31.4	14.2	43.5	1	D POOR	Persistent entropy formula error (V1+V3) and V4 data quality failures (SPX stale, gold units, BTC error). Lowest composite.
6	Perplexity	20	56.7	29	13.3	35.2	0.58	C WEAK	V1 weakness (20%) drags composite despite V3 improvement (57%) and moderate V4 CI (29%). Stateless architecture limits scalability.
